# Supplementary material for: An intercomparison study of four different techniques for measuring the chemical composition of nanoparticles
Source: Copernicus journal article supplement (doi:10.5194/acp-2022-498), 2022-08-26
Supplement: Supplementary file [file acp-2022-498-AC1-supplement.pdf]

Interactive discussion on *an intercomparison study of four different techniques for measuring the chemical composition of nanoparticles* by Caudillo et al., Atmos. Chem. Phys. Discuss., <https://doi.org/10.5194/acp-2022-498>, in review, 2022.

We thank the referees for their valuable and constructive feedback. We greatly appreciate their time investment for carefully reviewing our manuscript. In order to facilitate the discussion, we give different font colors. The comments by the referees are shown in black, while our answers are in blue. Any reference to the main text in the manuscript can be found in red.

### **Anonymous Referee #1**

“An intercomparison study of four different techniques for measuring the chemical composition of nanoparticles,” by Caudillo et al., compares measurements made by 4 different methods that have, to a varying degree, sensitivity that allow them to measure sub-100 nm diameter particle chemical composition. Such intercomparisons are rare, as many involve specialized instruments that are not often available for side-by-side intercomparisons. It is, however, important to point out the unique sensitivities that are inevitable with any measurement technique. Therefore, this manuscript represents a potentially important contribution to measurement science and therefore might eventually be suitable for publication in ACP. I have several concerns that I would like to ask authors to address before I consider this manuscript suitable.

Major comments.

I think it’s important for the authors to define early on what it means for an instrument to “measure the composition of <100 nm particles.” Clearly the method must be able to sample particles in this size range, but most instruments are capable of this including the Aerodyne AMS. The FIGAERO CIMS, filter-based methods, EESI-TOF, DAI, and many other methods can measure nanoparticle composition but only if the sampled population consists only of nanoparticles, since none of these methods have a means of size-separating sampled particles. Even instruments that are not designed to efficiently sample nanoparticles are able to do so provided that the sampling time and mass concentration of sampled nanoparticles are large enough. Can the authors be more descriptive of what makes these instruments the focus of this study? Are you looking specifically at instruments that measure the composition of sub-100 nm particles with a certain time resolution and concentration range?

The instruments that are described in this work provide the chemical composition at molecular level and have been designed to some extent for measuring sub-100 nm particles. Specifically, the TD-DMA was developed for performing size-resolved measurements in a size range from ~10 to ~30 nm. Nevertheless, we performed non-size-resolved TD-DMA measurements in order to increase the sample mass collected and to be comparable to the other methods (FIGAERO and EESI) that do not perform size selection.

Furthermore, this experiment was not originally planned as a rigorous particle inter-comparison experiment. However, as we carried out experiments on aerosol nucleation from highly oxygenated molecules at CLOUD and as we had the four methods available at the same time, we decided afterwards to inter-compare the methods.

The new particle formation experiments that we performed at CERN produce mainly sub-100 nm particles. Therefore, in this work, we present results of chemically laboratory-generated sub-100 nm diameter SOA only.

Following my first point, it seems important that any intercomparison study of instruments that measure nanoparticles should very clearly characterize sample size, specifically is the mass distribution of sampled particles, as well as sampling times. Unfortunately, in this manuscript very little attention is paid to this. The closest thing I could find is a mention of sample size and mass is “intensity” plots (units of counts/sec) in Figure S1. In that figure, there is no information on the mass distribution of particles sampled by the TD-DMA or filters, and how this mass distribution compares to those for the other two methods. It appears that most of the FIGAERO and EESI signals are coming from the latter part of the 4-hour period, so those samples may be biased by that sampling condition whereas the filter and TD-DMA mass-average over the entire period of the particle formation event. Please provide more analysis of this important issue.

Many thanks to the referee for this important point. In Section 2.2.1, we mentioned that the comparison period is based on the TD-DMA and FILTER collection times. Nevertheless, we recognize Figure S1 can be confusing. In order to better clarify how the intercomparison was done, we have updated Section 2.2.1, and moved Figure S1 into the main text (now as a Fig. 1). Additionally, we created a new Figure S1, and a table with the information about the collection times and parameters related to the particle sample for the purpose of the comparison.

Section 2.2.1 was adjusted:

In order to align the sampling times for the different techniques and perform a more direct particle-phase comparison, we selected as a reference the TD-DMA and FILTER collection times. Thus, for the comparison at -30 °C and -50 °C, EESI-TOF particle signals were averaged, and FIGAERO particle signals were integrated during the period where the TD-DMA collected particles (~3 and 5 hours, respectively). While for the comparison at -10 °C, the EESI-average and FIGAERO-integration period corresponded to the time where the particles were collected with the FILTER for the offline analysis (~17 hours).

Figure 1 provides an overview of a representative experiment at -30 °C. The overview of the experiments at -10 °C and -50 °C are shown in Fig. S1 in the supplement. Table 2 summarizes the sampling conditions during the experiments reported in this study (for the purpose of the intercomparison), including the particle number concentration, mass concentration and median mass diameter (MMD) calculated from the SMPS. The MMD indicates the particle size measured by the SMPS for which 50 % of the aerosol mass is contained in smaller particles and 50 % is

contained in larger particles. From Table 2 it can be seen that for the experiments at -30 °C and -50 °C  $MMD_{av} < 100$  nm, while for the experiment at -10 °C,  $MMD_{av} \sim 106$  nm.

Figure 1 has been updated in order to provide more information about the sample size:

Figure 1 shows a representative experiment at -30 °C in which EESI-TOF, FIGAERO and TD-DMA measured simultaneously. In Figure 1a, we added the mass median diameter (MMD), this parameter shows the particle diameter measured by the SMPS for which 50 % of the aerosol mass is contained in smaller particles and 50 % is contained in larger particles. During the experiment at -30 °C the MMD is smaller than 100 nm. Regarding the sampling times, we have added shadows into Figure 1d and e, to indicate the sample size period that was considered for the comparison.

As shown in Fig. 1f, the TD-DMA collected particles during the first hours of the particle nucleation event. For the particle phase comparison at -30 °C, EESI-TOF particle signals were averaged and FIGAERO signals were integrated during the TD-DMA collection time, as well as at -50 °C. While at -10 °C, the comparison period corresponded to the time where the particles were collected with the FILTER for the offline analysis.

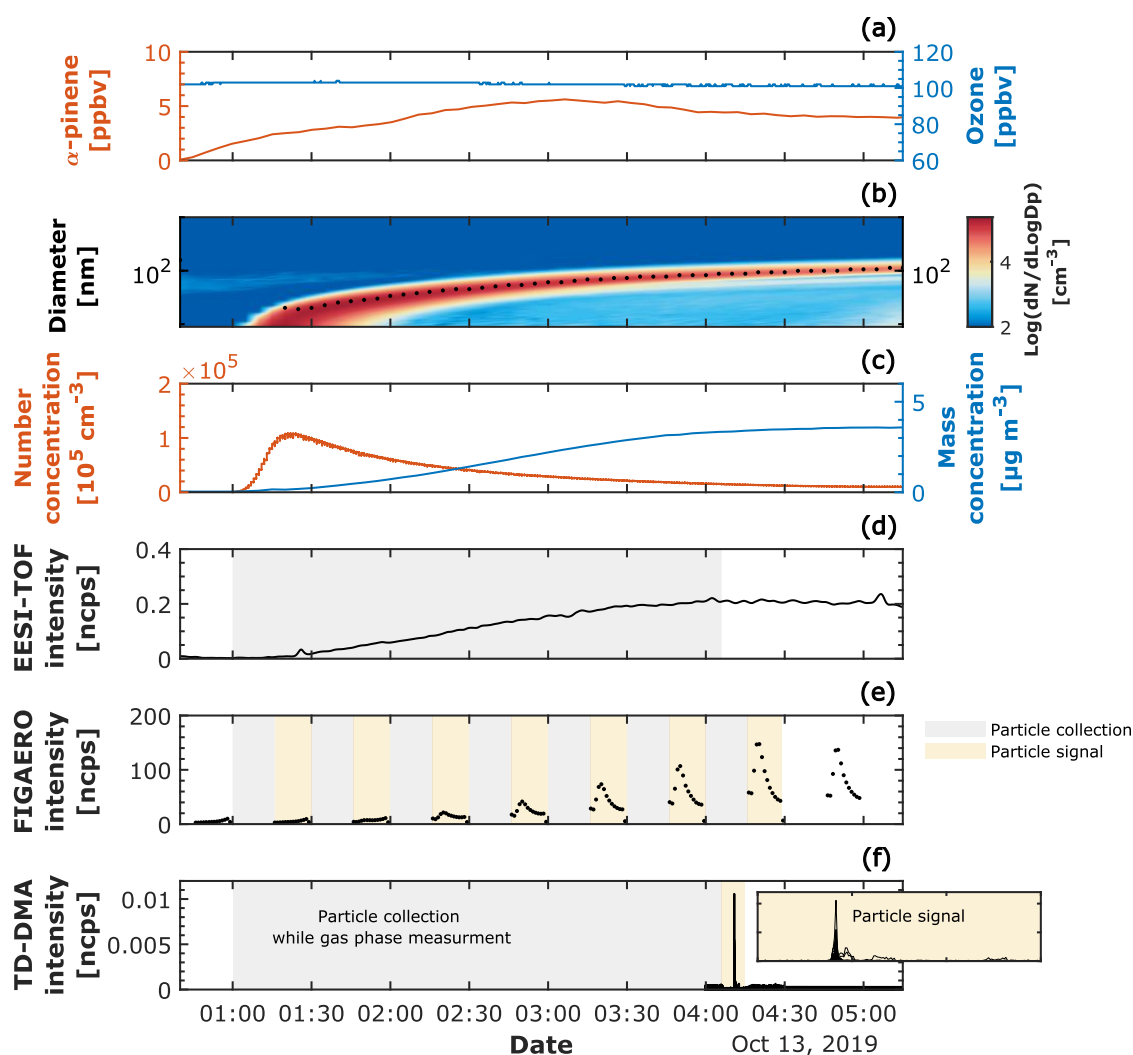

Figure 1. Experimental overview of a representative biogenic new particle formation experiment ( $\alpha$ -pinene ozonolysis at  $-30$  °C and 20 % RH). (a) Mixing ratio in ppbv for the precursor gases,  $\alpha$ -pinene and ozone. (b) Particle size distribution measured by the SMPS; the color scale represents the log 10 of the normalized particle concentration per cubic centimeter ( $\text{cm}^{-3}$ ). The median mass diameter (MMD) is shown with a black dashed line. (c) Particle number concentration in  $\text{cm}^{-3}$  measured by the CPC with a cut-off diameter of 2.5 nm and mass concentration in  $\mu\text{g m}^{-3}$  (obtained by integrating the normalized mass concentration from the SMPS). (d) Particle-phase signal measured continuously by the EESI-TOF, the gray shaded area refers to the period where the EESI-TOF was averaged for the intercomparison with TD-DMA and FIGAERO. (e) Particle-phase measured by FIGAERO, the gray shaded areas refer to the particle collection period and the yellow shaded areas to the desorption period. FIGAERO measured in a semicontinuous mode, namely 15-minute particle collections followed by 15-minute desorption periods. In order to intercompare with EESI-TOF and TD-DMA, FIGAERO signals were integrated during the period where the TD-DMA collected particles ( $\sim 3$  hours), seven FIGAERO particle samples were integrated during the 3 hours comparison period. (f) Particle-phase measured by the TD-DMA; The TD-DMA collection period was approximately 3 hours while the desorption period lasted around 1 minute followed by a second heating for estimating the background.



Besides the representative experiment shown in Figure 1, we added a new Figure (Fig. S1), which shows the size distribution for experiments at  $-10\text{ }^{\circ}\text{C}$  and  $-50\text{ }^{\circ}\text{C}$ .

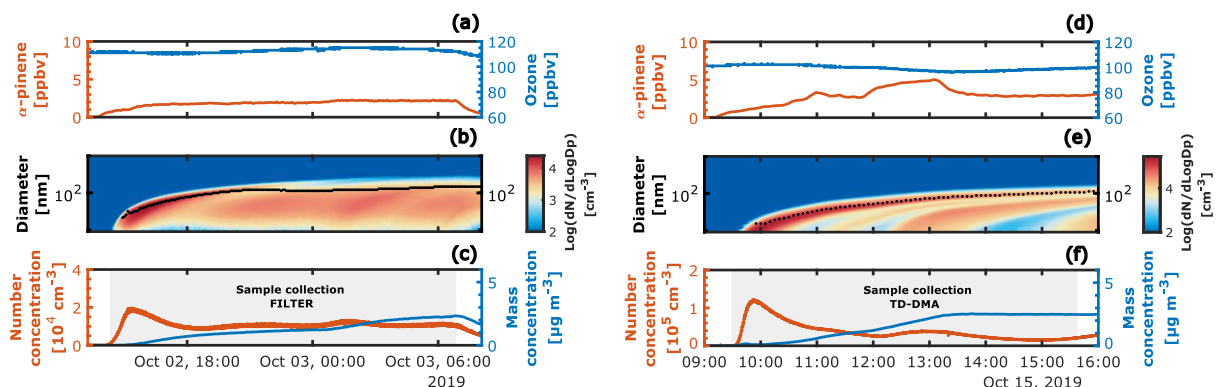

Figure S1. Experimental overview of biogenic new particle formation experiments performed at  $-10\text{ }^{\circ}\text{C}$  (left) and  $-50\text{ }^{\circ}\text{C}$  (right). Figures (a) and (d), show the mixing ratio in ppbv for the precursor gases,  $\alpha$ -pinene, and ozone at  $-10\text{ }^{\circ}\text{C}$  and  $-50\text{ }^{\circ}\text{C}$ , respectively. Figures (b) and (e) particle size distribution measured by the SMPS; the color scale represents the log 10 of the normalized particle concentration per cubic centimeter ( $\text{cm}^{-3}$ ). The median mass diameter (MMD) is shown with a black dashed line. Figures (c) and (f), particle number concentration in  $\text{cm}^{-3}$  measured by the CPC with a cut-off diameter of 2.5 nm and mass concentration in  $\mu\text{g m}^{-3}$  (obtained by integrating the normalized mass concentration from the SMPS), the gray shaded areas refer to the particle collection period used for the comparison with EESI-TOF and FIGAERO. The sample collection period for the intercomparison was determined by the FILTER at  $-10\text{ }^{\circ}\text{C}$  and by the TD-DMA at  $-50\text{ }^{\circ}\text{C}$ .

To summarize, we introduce a new table (Table 2) into the main text.

**Table 2.** Sample size conditions during the experiments performed at  $-30\text{ }^{\circ}\text{C}$ ,  $-10\text{ }^{\circ}\text{C}$  and  $-50\text{ }^{\circ}\text{C}$ . For the purposes of this intercomparison study, the sampling times were aligned base on the TD-DMA and FILTER collection times.

| Experiment                    | Instruments intercompared    | Collection time / Comparison period (TD-DMA or FILTER) | Particle number concentration average* $\text{CPC}_{2.5}$ [ $\text{cm}^{-3}$ ] | Mass concentration average* SMPS [ $\mu\text{g cm}^{-3}$ ] | Median mass diameter (MMD) average*, max** [nm] |
|-------------------------------|------------------------------|--------------------------------------------------------|--------------------------------------------------------------------------------|------------------------------------------------------------|-------------------------------------------------|
| $-30\text{ }^{\circ}\text{C}$ | TD-DMA, EESI-TOF and FIGAERO | ~3 hours                                               | 4.5e+04                                                                        | 1.70                                                       | 51, 82                                          |
| $-10\text{ }^{\circ}\text{C}$ | FILTER, EESI-TOF and FIGAERO | ~17 hours                                              | 1.0e+04                                                                        | 1.24                                                       | 106, 147                                        |
| $-50\text{ }^{\circ}\text{C}$ | TD-DMA, EESI-TOF and FIGAERO | ~5 hours                                               | 3.6e+04                                                                        | 1.67                                                       | 66, 106                                         |

\*Average during the sample collection period. \*\*maximum value during the sample collection period

Line 104: Since this is a paper about nanoparticle characterization, why wouldn't a perfect instrument also be capable of measuring particles of sufficient mass concentration and with time scales that represent ambient conditions? It's not sufficient, in my view, to let the vague phrase "in newly formed particles" (Line 102) quantify these conditions. Also, where does size-resolved properties come into play? If this is primarily a study of instruments that are only suitable in lab,

then yes this is an appropriate definition of a perfect instrument. But none of these instruments were tested in this way.

The paragraph has been modified as suggested:

None of the techniques presented in this work represents the perfect instrument. In fact, a perfect instrument would be the one that is able to measure quantitatively all the hundreds of organic compounds that are present not only in the newly formed particles in the lab, but also in aerosol particles present in the ambient, i.e., with larger particles being present as well and at low mass concentration of the ultrafine particles. A perfect instrument should also be able to identify the molecular structures (including their isomeric and spatial configuration) at high time resolution and in real-time. Such an ideal instrument does not exist; and at present, a combination of techniques is required for a more complete characterization of SOA (Hallquist et al., 2009).

Section 2.1.2: It's important to state here that the TD-DMA is can run in size-resolved mode but was not run this way in order to maximize sample size. Sample size is key to these intercomparisons so it's important for the reader to understand situations in which the instrument operation was altered for these studies. Specifically, it appears that 4 hours were needed for TD-DMA and 15 min collection for FIGAERO. This is an important distinction and the reader needs to know why this compromise was made in order to properly assess differences in these methods.

Section 2.1.2 was modified as suggested:

The TD-DMA coupled to a  $\text{NO}_3^-$  CI-APi-TOF analyzes the chemical composition of nanoparticles in a semi-continuous mode of operation. The design and characterization have been reported by Wagner et al. (2018). This method allows gas-and particle-phase measurements using the same ionization technique. Individual results of gas-and particle-phase comparison of the same chemical system as in this study were reported in Caudillo et al. (2021). While the gas-phase measurement is taking place with the CI-APi-TOF mass spectrometer, the TD-DMA samples particles from the chamber. The TD-DMA can perform size-resolved and non-size-resolved measurements. In any case, the particles are first charged by an X-Ray source and then transferred to the differential mobility analyzer (DMA) unit. When a size-resolved measurement is desired, a specific voltage is applied to the central electrode inside the DMA unit. Subsequently, a sheath flow will carry only particles with specific electrical mobility and will conduct them through the DMA. In contrast, during a non-size-resolved measurement, no voltage to the central electrode and no sheath-flow are applied, and a fraction of the particles charged by the X-ray source will pass through the DMA unit. For the experiments reported in the present study, we performed non-size-resolved measurements in order to maximize the mass collected and to be comparable to the other methods that do not perform size selection.

The particle collection takes place by electrostatic precipitation on a platinum/rhodium (90:10) filament placed inside the central electrode. After a certain collection time (~3 hours for the experiment at  $-30\text{ }^\circ\text{C}$ , and ~5 hours for the experiment at  $-50\text{ }^\circ\text{C}$ ), an electric current is applied to the filament, which causes its direct heating. We estimate based on the filament resistance, that the

temperature gradually increased up to approximately 600 °C in a period of ~1 minute (details of the heating curve will be discussed in Section 3.2).

Lines 204 and 227: How long were filter samples collected? This is important for comparison to other methods.

We have corrected and added the filter collection time in Section 2.1.5 as requested.

First, the particles were collected from a flow of 5 l min<sup>-1</sup> on a 47 mm diameter Emfab™ Filter (Pall Life Science, USA) during approximately 17 hours for the experiment at -10 °C (see Table 2 and Figure S1). After sampling, the filter was stored at -18 °C to avoid possible losses by evaporation.

Furthermore, we revised the text of Section 2.2.1., see above (lines 250-255 of the revised manuscript). As mentioned previously, all the information regarding sampling times for the intercomparison is now enclosed in Table 2 and Figure S2.

Line 223: I don't understand ... I thought 15 min collections??? Do you mean thermogram data were averaged? Also in the next section you say that you averaged TD-DMA to 1 sec, so it's a bit confusing to say that the raw data were processed to 1 min but the PMF was done on 1 sec data.

Regardless of the collection time, the TD-DMA and FIGAERO provide 1-second data during the desorption process. In order to get more information about the thermal desorption behavior, the PMF was done using the 1-second TD-DMA and 1-second FIGAERO data. Only for this purpose, the 1-second data was not averaged.

Nevertheless, we do average FIGAERO data for other purposes, for example in Figure 1e, we show 1-minute average data.

We refer to this in Section 2.2.2:

We therefore applied the same procedure as Buchholz et al. (2020) to the TD-DMA and FIGAERO thermal desorption profiles (for the  $\alpha$ -pinene oxidation experiment at -30 °C and 20 % RH only). For the analysis, we processed separately 1-second TD-DMA and 1-second FIGAERO thermograms. Since the FIGAERO measures in a semi-continuous mode, we chose a representative thermogram.

All the data presented in this work has been processed, therefore we have deleted the term raw data from the main text (Section 2.2.1).

TD-DMA, FIGAERO and EESI-TOF data were processed using IGOR Pro 7 (WaveMetrics, Inc., USA) and Tofware (Version 3.1.2, Aerodyne Inc., USA). The data from the offline method was processed with Compound Discoverer 3.2 (Thermo Fisher Scientific). The postprocessing was done using MATLAB R2022a (MathWorks, Inc., USA).

TD-DMA data was corrected by the mass-dependent transmission efficiency in the mass classifier (Heinritzi et al., 2016) and normalized by the nitrate reagent ions. FIGAERO data was averaged to 1 minute and normalized by the reagent ions. EESI-TOF signals were averaged to 10 seconds and normalized by the most abundant electrospray ion ( $\text{NaIna}^+$ ).

Line 231: I believe there is actually a body of work that explored thermal degradation in FIGAERO (D'Ambro et al., 2019; Lopez-Hilfiker et al., 2015; Stark et al., 2017; Wang and Hildebrandt Ruiz, 2018). Please discuss and reference relevant studies.

D'Ambro, E. L., Schobesberger, S., Gaston, C. J., Lopez-Hilfiker, F. D., Lee, B. H., Liu, J., Zelenyuk, A., Bell, D., Cappa, C. D., Helgestad, T., Li, Z., Guenther, A., Wang, J., Wise, M., Caylor, R., Surratt, J. D., Riedel, T., Hyttinen, N., Salo, V.-T., Hasan, G., Kurtén, T., Shilling, J. E., and Thornton, J. A.: Chamber-based insights into the factors controlling epoxydiol (IEPOX) secondary organic aerosol (SOA) yield, composition, and volatility, *Atmos. Chem. Phys.*, 19, 11253–11265, <https://doi.org/10.5194/acp-19-11253-2019>, 2019.

Lopez-Hilfiker, F. D., Mohr, C., Ehn, M., Rubach, F., Kleist, E., Wildt, J., Mentel, Th. F., Carrasquillo, A. J., Daumit, K. E., Hunter, J. F., Kroll, J. H., Worsnop, D. R., and Thornton, J. A.: Phase partitioning and volatility of secondary organic aerosol components formed from  $\alpha$ -pinene ozonolysis and OH oxidation: the importance of accretion products and other low volatility compounds, *Atmos. Chem. Phys.*, 15, 7765–7776, <https://doi.org/10.5194/acp-15-7765-2015>, 2015.

Stark, H., Yatavelli, R. L. N., Thompson, S. L., Kang, H., Krechmer, J. E., Kimmel, J. R., Palm, B. B., Hu, W., Hayes, P. L., Day, D. A., Campuzano-Jost, P., Canagaratna, M. R., Jayne, J. T., Worsnop, D. R., and Jimenez, J. L.: Impact of Thermal Decomposition on Thermal Desorption Instruments: Advantage of Thermogram Analysis for Quantifying Volatility Distributions of Organic Species, *Environ. Sci. Technol.*, 51, 8491–8500, <https://doi.org/10.1021/acs.est.7b00160>, 2017.

Wang, D. S. and Hildebrandt Ruiz, L.: Chlorine-initiated oxidation of n-alkanes under high-NO<sub>x</sub> conditions: insights into secondary organic aerosol composition and volatility using a FIGAERO–CIMS, *Atmos. Chem. Phys.*, 18, 15535–15553, <https://doi.org/10.5194/acp-18-15535-2018>, 2018.

Thank you very much for the suggestion, we have added these references to the main text in both Introduction and Section 3.2.1.

Please also refer to the lines 632, 768, 812, 852 of the revised manuscript (tracked version).

#### Section 1. Introduction:

Thermal decomposition on FIGAERO particle phase data has been reported previously. D'Ambro et al. (2019), observed that some of the major components of IEPOX (isoprene-derived epoxydiol) in SOA such as  $\text{C}_5\text{H}_{10}\text{O}_3$  and  $\text{C}_5\text{H}_{12}\text{O}_4$  are likely artifacts of thermal decomposition. Lopez-Hilfiker et al. (2015), Stark et al. (2017), Wang and Hildebrandt Ruiz (2018) have addressed the importance of considering thermal decomposition for assessing the chemical composition and

volatility properties of SOA in techniques in which the aerosol is heated before or during the analysis. In this study, we evaluate thermal decomposition of TD-DMA samples for the first time and intercompare the results with FIGAERO.

### Section 3.2.1 Positive matrix factorization results:

By applying PMF analysis to thermal desorption data we observed that often, several factors are needed to explain the behavior of a single ion. One example is shown in the thermal profile of  $C_8H_{12}O_4$  for both FIGAERO and TD-DMA (in the Supplement Fig. S11). Particularly, F4<sub>TD-DMA</sub> and F6<sub>FIGAERO</sub> explain the  $C_8H_{12}O_4$  signal at higher temperature. This is consistent with previous observations. Lopez-Hilfiker et al. (2015) reported a significant contribution of thermal decomposition to the detection of  $C_8H_{12}O_4$  in the  $\alpha$ -pinene ozonolysis system and stated that small acids present in higher-than-expected concentrations in SOA are likely entirely due to thermal decomposition. In our previous work (Caudillo et al., 2021), we presented individual results of gas- and particle-phase of the same chemical system as in this study using the same ionization and detection scheme. We found that  $C_8H_{12}O_4$  contributed ~10 times more to the particles than to the gas-phase.

Furthermore, in the present study, the presence of the other PMF factors suggests that either there are at least 3 isomers with distinguishable volatility, or that there are different thermal decomposition processes occurring at different desorption temperatures which all form  $C_8H_{12}O_4$  as a stable product. There are some studies that suggest possible decomposition pathways. For example, Hyttinen et al. (2022) investigated the two possible thermal decomposition reactions (dehydration and decarboxylation) proposed by Yang et al. (2021), and explored which reactants provide  $C_8H_{12}O_4$  as a product. They reported two isomers of  $C_8H_{12}O_4$  formed from  $C_9H_{12}O_6$  decarboxylation and one isomer formed from  $C_8H_{14}O_5$  dehydration. Certainly, the mechanisms that explain our observation remain uncertain and need to be further investigated.

Line 265: This is well-known and should have been discussed previously when the methods were introduced (with references). Here are some that I know about:

Lopez-Hilfiker, F. D., Iyer, S., Mohr, C., Lee, B. H., D'Ambro, E. L., Kurtén, T., and Thornton, J. A.: Constraining the sensitivity of iodide adduct chemical ionization mass spectrometry to multifunctional organic molecules using the collision limit and thermodynamic stability of iodide ion adducts, *Atmos. Meas. Tech.*, 9, 1505–1512, <https://doi.org/10.5194/amt-9-1505-2016>, 2016.

Modeling the Detection of Organic and Inorganic Compounds Using Iodide-Based Chemical Ionization, Siddharth Iyer, Felipe Lopez-Hilfiker, Ben H. Lee, Joel A. Thornton, and Theo Kurtén, *The Journal of Physical Chemistry A* 2016 120 (4), 576-587, DOI: 10.1021/acs.jpca.5b09837

We added the references regarding the chemical ionization methods when we introduced them. Additionally, we deleted the acronym HOMs and use the terms highly oxygenated molecules and intermediate oxygenated molecules instead.

#### Section 2.1.2 TD-DMA

With the nitrate ionization technique, sulfuric acid (Jokinen et al., 2012), iodic acid (He et al., 2021), methane sulfonic acid (Shen et al., 2022), and highly oxygenated molecules (Kirkby et al., 2016; Simon et al., 2020) can be detected.

#### Section 2.1.3 FIGAERO

With this soft ionization technique, the FIGAERO HRTof-CIMS can detect intermediate oxygenated organic molecules (Wang et al., 2020; Stolzenburg et al., 2018; Lopez-Hilfiker et al., 2016), organosulfates, and inorganic acids such as sulfuric acid and nitric acid.

#### Section 2.1.4 EESI-TOF

With this ionization method, most organic compounds that are relevant for atmospheric SOA particles can be analyzed, such as intermediate oxygenated organic molecules with the exception of species that are not oxygenated and organosulfates (Lopez-Hilfiker et al., 2019).

Please also refer to the lines 666, 706, 775, 779, 790, 800, 816 and 856 of the revised manuscript (tracked version).

Section 3.2 and Figure 5: Why isn't the background subtracted for the TD-DMA data. Also it is very difficult to compare spectra when the temperature range is so different. Can the TD-DMA data be plotted over the same temperature range? In general, I felt that very little in the way of analysis is provided in this section.

The purpose of Section 3.2 and Figure 6 (before Fig. 5) is to describe the thermal desorption profiles in both FIGAERO and TD-DMA for three different compounds. One of the main differences in the desorption process of these two instruments is that the TD-DMA performs a second heating immediately after without particle collection. Thus, the second TD-DMA heating helps us to estimate the background (e.g., due to the heating of the inlet line). Moreover, we show in Fig. 6 that most of the TD-DMA particle constituents have been efficiently evaporated in the first heating. We agree that it is difficult to compare FIGAERO and TD-DMA profiles in the way that they are currently plotted. Hence, we have modified Fig. 6 as suggested:

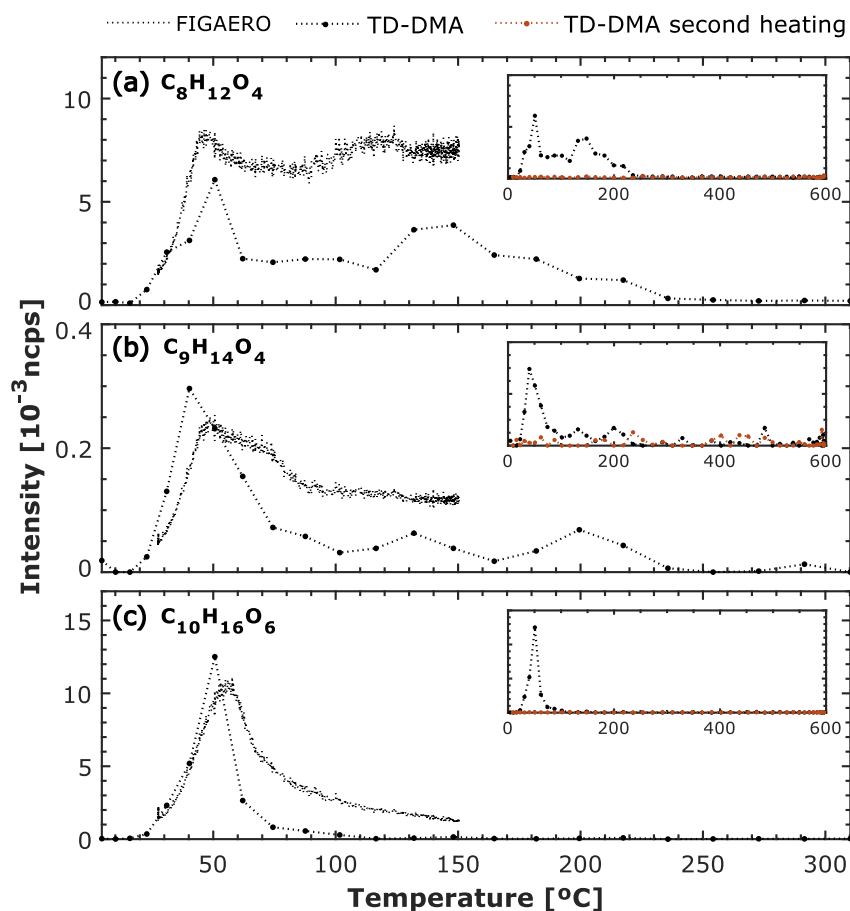

Figure 6. FIGAERO and TD-DMA thermal desorption profiles for three different compounds detected in  $\alpha$ -pinene ozonolysis experiment at  $-30\text{ }^{\circ}\text{C}$  and 20 % RH. (a)  $\text{C}_8\text{H}_{12}\text{O}_4$ , (b)  $\text{C}_9\text{H}_{14}\text{O}_4$ , and, (c)  $\text{C}_{10}\text{H}_{16}\text{O}_6$ . FIGAERO and TD-DMA intensities are normalized by the reagent ions and expressed in normalized counts per second (ncps), FIGAERO signals have been divided by  $1\text{E}3$  in (a) and (c) and by  $5\text{E}4$  in (b). FIGAERO temperature is slowly ramped up to  $150\text{ }^{\circ}\text{C}$  in approximately 15 minutes while TD-DMA temperature increased up to  $600\text{ }^{\circ}\text{C}$  in approximately 1 minute. The TD-DMA temperature is an estimate based on the resistance of the filament. For the TD-DMA two heating profiles are needed for determining the particle signal and the background due to the heating of the inlet line.

Thereby, we have updated Section 3.2, as follows:

Figure 6 shows the thermograms obtained by FIGAERO and TD-DMA for three different species detected in the  $\alpha$ -pinene ozonolysis experiment at  $-30\text{ }^{\circ}\text{C}$ . Fig. 5a shows that the  $\text{C}_8\text{H}_{12}\text{O}_4$  signal measured by both FIGAERO and TD-DMA is broad and exhibits a multimodal behavior, two maxima are observed at approximately  $50\text{--}60\text{ }^{\circ}\text{C}$  and at  $\sim 120\text{--}150\text{ }^{\circ}\text{C}$ . As described in Section 2, the FIGAERO temperature is slowly ramped up to  $150\text{ }^{\circ}\text{C}$  in approximately 15 minutes while the TD-DMA temperature increased up to  $600\text{ }^{\circ}\text{C}$  in approximately 1 minute. From Fig. 6a it can be seen at  $\sim 250\text{ }^{\circ}\text{C}$  the  $\text{C}_8\text{H}_{12}\text{O}_4$  signal measured by the TD-DMA reached background levels. This might suggest that higher than  $150\text{ }^{\circ}\text{C}$  FIGAERO temperatures are needed for completely evaporating this SOA component collected at  $-30\text{ }^{\circ}\text{C}$ . In contrast, Fig. 6b and c show that the normalized intensity of  $\text{C}_9\text{H}_{14}\text{O}_4$  and  $\text{C}_{10}\text{H}_{16}\text{O}_6$  first increased reached a maximum at around 40-



60 °C, and gradually decreased (sharp peak). A similar trend is observed in both FIGAERO and TD-DMA.

Additionally, we display in Fig. 6 the second TD-DMA heating. A second heating is performed immediately after the first heating, without particle collection. This performance allows us to estimate the signal coming from the particles and the signal coming from the background due to the inlet line. From the background measurement, it can be seen that the particle constituents measured by the TD-DMA have been efficiently evaporated.

Hyttinen et al. (2022) reported the  $T_{\max}$  values of several particle-phase compounds measured by FIGAERO during  $\alpha$ -pinene ozonolysis experiments. The reported values for  $C_8H_{12}O_4$ ,  $C_9H_{14}O_4$ , and  $C_{10}H_{16}O_6$  are ~80 °C, ~73 °C, and ~61 °C. These values do not distant from the ones measured by both TD-DMA and FIGAERO during the experiment reported here, with the exception of the second maxima observed in  $C_8H_{12}O_4$ .

Section 3.3. First of all, the title is not very descriptive. I would suggest something like “Discussion of advantages and disadvantages of methods for measuring sub-100 nm SOA.” Overall, I have a lot of concerns about this section. Every point made in this section could have been stated even before this study began, having been established elsewhere. Firstly, the discussion in the first paragraph really appears to emphasize that this was not a very well-characterized intercomparison study (actually finally here I see that the filters were collected for 8 hours ... that should appear earlier in the paper as I have already suggested). The first paragraph is just stating the sampling conditions. The second paragraph discusses the implications of sampling longer. The third and fourth paragraphs just say more things about the sampling for the TD-DMA and HRMS analysis. Most of the information up to this point should be in the methods section. The point made in line 429 and following regarding FIGAERO has been made by several others (see references above) although this may be a new finding for the TDDMA. Line 436 discusses extraction of filter samples, another well-studied problem. The paragraph of the importance of ionization has been already well-studied. Summarizing, in reading this, it appears that all the main conclusions of this study have already been made elsewhere. So other than be reminded of them, is there any reason why a someone should read this manuscript? Please don't misinterpret this question because I think this is a very rich study with a lot of data. I just don't feel that if Section 3.3 contains the main take-aways from this study, the I feel that this study does not have a lot of things to teach us about these methods.

Many thanks for your suggestion. We have modified the title as suggested and removed from this section the information that indeed belongs to the methods section. We agree that most of the findings from our study with respect to the performance and limitations of the methods have been reported before, nevertheless we would like to point out that it is very important to confirm such previous findings by independent studies, and on the other hand demonstrate that the findings from the different methods are not contradicting each other. From direct comparison of the methods discussed in Figures 2, 3, 4, and 5, the results from the methods for the identical aerosol system are compared and therefore the observed differences can be directly contributed to the differences



of the methods. This study therefore provides valuable new insights about the methods (especially for TD-DMA these points have not been established before). We think that discussing the advantages and disadvantages of the methods is valuable and it is helpful for the readers. Therefore, our suggestion of section 3.3 is as follows:

### Section 3.3 Discussion of advantages and disadvantages of methods for measuring sub-100 nm SOA

Table 3 summarizes some advantages and disadvantages that should be considered when applying the methods presented here to the measurement of laboratory-generated sub-100 nm diameter SOA. When measuring particle chemical composition, the time needed for collecting enough particles (mass) should be carefully considered. This fact becomes a challenge when analyzing nanoparticles, since the small particles do not contribute significantly to the overall SOA mass. In that regard, EESI-TOF and FIGAERO provide a faster response (every 1 second and 30 minutes, respectively) than the other two methods, and allows a nearly real time monitoring. This is especially convenient when the chemical composition changes continuously (i.e., in complex environments or during oxidative flow reactor or chamber experiments). In fact, the EESI-TOF's total particle signal exhibited a good correlation with the mass concentration calculated from the Scanning Mobility Particle Sizer (SMPS) measurements ( $r^2 > 0.94$ , Fig. S12 in the Supplementary material). Despite the fact that there is a size-dependence on EESI-TOF sensitivity, EESI-TOF sensitivity decreases as the size of the particles increases (Lee et al., 2021b). The particle collection periods for TD-DMA and FILTER (offline analysis) were much longer and depended on the particle load and limit of detection. Besides the low time resolution, a main disadvantage of longer collection times is that aerosol aging may occur. This can potentially change the chemical composition and therefore lead to inaccurate aerosol speciation. Several studies have reported positive and negative artifacts caused by adsorption of gases on the collection surfaces, longer sampling periods, and volatilization of organic species either during collection or during storage (Turpin et al., 1994; Subramanian et al., 2004; Kristensen et al., 2016).

The mass spectrometers coupled to TD-DMA and FIGAERO (nitrate CI-APi-TOF and iodide HRTof-CIMS, respectively) can perform gas-phase measurements while the particle collection takes place. EESI-TOF in the dual-configuration can measure both particle-and gas-phase quasi simultaneously. This allows for a direct comparison between gas-and particle-phase. Nevertheless, these mass spectrometry techniques can only identify chemical formulas but with some limitations. Thus, it is not possible for example to provide structural information or identification of isomers. In contrast, the UHPLC-HESI-HRMS offline method has the advantage of being able to distinguish between clusters, molecules, and isomers based on the chromatographic separation. Furthermore, the fragmentation pattern (via MS<sup>2</sup>-experiments) can provide hints to interpret the functional groups and can be used for unambiguous compound identification. Hence, UHPLC-HRMS can provide robust analytical insight of the stable compounds.

The thermal desorption methods (TD-DMA and FIGAERO) exhibit significant thermal decomposition of compounds with desorption temperatures above 100 °C. For the EESI this seems to be less of an issue in general but in some specific studies thermal decomposition was found to

be relevant (Bell et al., 2021). PMF analysis of the thermal desorption data from the TD-DMA and FIGAERO could separate the contribution of products from thermal decomposition from those directly desorbing. However, even with this method, it is not possible to obtain information about the original compounds decomposing and their true volatility. The observed decomposition temperature can be used as an upper limit for volatility (i.e., their true volatility is lower than that associated with the apparent desorption temperature).

For the FILTER method, the compounds collected on the filter have to be extracted into a liquid phase for the UHPLC separation. The choice of solvents for this extraction will determine which fraction of organic compounds will be analyzed. The water-methanol mixture used in this study will extract polar, hydrophilic compounds similar to the water-soluble organic carbon category. Note that the exposure to water (or other solvents) may lead to chemical reactions, e.g., hydrolysis of (hydro) peroxides. The selective extraction and potential aqueous phase chemistry may explain the smaller number of compounds detected with the FILTER method. However, for the compounds that do get analyzed, a much deeper understanding can be achieved (e.g., separation of isomers).

The ionization technique also plays a role on the final detection. If the ionization technique is not soft enough, this can result in fragmentation and affects the final response in the detection. In principle, the ionization techniques utilized by the instruments reported here are soft, meaning that no significant fragmentation occurs during the detection. Nevertheless, the ionization efficiency is different between the techniques. For example, with the nitrate reagent ion, highly oxygenated species can be better detected, while the ionization techniques used for FIGAERO and EESI-TOF ( $I^-$ , and  $Na^+$ , respectively) are more sensitive to intermediately oxygenated organic compounds. The UHPLC-HESI-HRMS can be operated in both polarity modes, however, and therefore detect species are either able to donate protons (in the negative mode) or form clusters with protons or sodium (in the positive mode).

The complete characterization of species in the particle-phase in terms of chemical formula and structure represents an analytical challenge. In this sense, the full identification of organic compounds is only possible by combining different techniques.

Minor corrections:

It is very difficult to see the shaded regions of Figure S1e and f.

Figure S1 was moved into the main text (now Fig. 1), and modified as requested. We added darker shaded regions.

Line 55: "nanoparticles" has a lot of possible definitions. For the abstract, I would prefer to see a mobility or physical diameter range mentioned.

We have modified the sentence as requested:

Several methods for particle-phase characterization have been recently developed to better detect and infer more accurately the sources and fates of sub-100 nm particles, but a detailed comparison of different approaches is missing.

Lines 66 and 111, 295: A more accurate work instead of “calculating” is “estimating” or “modeling”.

Lines 66, 11 and 295 have been modified as suggested.

Line 121: imprecise -- constituents (not particles) are transferred to the gas phase.

Modified as suggested:

Both instruments first collect particles and subsequently the particles are evaporated in order to transfer their constituents to the gas-phase.

Line 128: Do the authors mean SOA in sub-100 nm particles here?

Yes, we have modified it accordingly.

The four techniques described in this work are feasible for measuring sub-100 nm SOA particles and represent an important analytical development.

Line 167: “signal” is an imprecise term. Suggest "a more accurate determination of particle constituents" or some-such.

Modified as suggested:

A second heating cycle of the particle collecting filament is performed afterwards (without particle collection) in order to estimate the instrumental background due to the heating of the inlet line; this enables a more accurate determination of particle constituents. The particle constituents are estimated by subtracting the second heating from the first heating. Besides the particle and background estimations, a second heating up to ~600 °C ensures that the filament is clean and avoids memory effects for the next measurement.

Lines 169 and 184: It is important to note that HOMs, as defined here, are different because of the I- chemistry or NO<sub>3</sub>- chemistry. In the text it makes the reader believe that these are the same compounds.

We deleted the acronym HOMs and use the terms highly oxygenated molecules and intermediate oxygenated molecules instead and intermediate oxygenated molecules.

Please refer to the lines 190, 204 and 220 of the revised manuscript.

Line 188: imprecise language -- particles obviously need to be collected. Replace with "batch collection" perhaps.

Modified as suggested:

The Extractive electrospray ionization time-of-flight mass spectrometer (Lopez-Hilfiker et al., 2019) is a technique used for online particle-phase measurements without batch collection.

Line 194: Imprecise definition of electrospray. Solvent evaporation leads to Coulomb fissioning and/or direct ion desorption.

Modified as suggested:

The particles then collide with electrospray droplets and the soluble components are extracted and ionized. Then, solvent evaporation occurs in a heated stainless-steel capillary, leading to Coulomb fissioning and/or direct ion desorption. Finally, ions enter a time-of-flight mass spectrometer.

Line 197: provide reference ... is it still Lopez-Hilfiker?

The reference was added:

Yes, it is still Lopez-Hilfiker. Please refer to the line 221 of the revised manuscript.

Lines 219 and 225: were processed and were averaged

Modified as suggested:

TD-DMA, FIGAERO and EESI-TOF data were processed using IGOR Pro 7 (WaveMetrics, Inc., USA) and Tofware (Version 3.1.2, Aerodyne Inc., USA). The data from the offline method was processed with Compound Discoverer 3.2 (Thermo Fisher Scientific). The postprocessing was done using MATLAB R2022a (MathWorks, Inc., USA).

TD-DMA data was corrected by the mass-dependent transmission efficiency in the mass classifier (Heinritzi et al., 2016) and normalized by the nitrate reagent ions. FIGAERO data was averaged to 1 minute and normalized by the reagent ions. EESI-TOF signals were averaged to 10 seconds and normalized by the most abundant electrospray ion ( $\text{NaIna}^+$ ). In order to align the sampling times for the different techniques and perform a more direct particle-phase comparison, we selected as a reference the TD-DMA and FILTER collection times. Thus, for the comparison at  $-30\text{ }^\circ\text{C}$  and  $-50\text{ }^\circ\text{C}$ , EESI-TOF particle signals were averaged, and FIGAERO particle signals were integrated during the period where the TD-DMA collected particles ( $\sim 3$  and  $5$  hours, respectively). While for the comparison at  $-10\text{ }^\circ\text{C}$ , the EESI-average and FIGAERO-integration

period corresponded to the time where the particles were collected with the FILTER for the offline analysis (~17 hours).

Line 228: what postprocessing? Why is there a line break here?

The line break was eliminated and mentioned as it follows:

TD-DMA, FIGAERO and EESI-TOF data were processed using IGOR Pro 7 (WaveMetrics, Inc., USA) and Tofware (Version 3.1.2, Aerodyne Inc., USA). The data from the offline method was processed with Compound Discoverer 3.2 (Thermo Fisher Scientific). The postprocessing was done using MATLAB R2022a (MathWorks, Inc., USA).

Tofware and Compound Discover helped us to analyze mass spectrometry data (peak fitting and chemical compound identification). By postprocessing, we mean that we use MATLAB for plotting and treating the final data.

Line 275: correct term is soft ionization techniques

Modified as suggested:

On the other hand, the resulting fractions of  $C_{>10}$  can be influenced by the ionization method employed: chemical ionization and electrospray are soft ionization techniques, for which one can expect little fragmentation. Thus, we presume that thermal decomposition during evaporation could be the most significant factor that explain these differences.

Line 354: Not a good idea to start a new paragraph with “On the other hand”. Suggest: "For the purpose of comparison,"

Modified as suggested:

For the purpose of comparison, we present in Figure 8 the results from applying PMF to the FIGAERO thermal desorption data for a solution with 6 factors.

Line 395: imprecise: “when applying the methods presented here to the measurement of laboratory-generated sub-100 nm diameter SOA.”

Modified as suggested:

Table 3 summarizes some advantages and disadvantages that should be considered when applying the methods presented here to the measurement of laboratory-generated sub-100 nm diameter SOA.

### Anonymous Referee #3

Caudillo et al. performed an intercomparison of four widely used techniques for analyzing sub-100 nm particle chemical compositions based on the dataset from the same CLOUD experiment. The manuscript is full of technical details and the discussions on the advantages and disadvantages of TD-DMA, FIGAERO, EESI-TOF, and UHPLC-HESI-HRMS are comprehensive. I think it will be more acceptable to enclose some discussion on what's new about science from the experiment that the intercomparison can bring to us before the manuscript is suitable for publication in ACP. I only have the following four major concerns:

We agree that most of the findings from our study with respect to the performance and limitations of the methods have been reported before, nevertheless we would like to point out that it is very important to confirm such previous findings by independent studies, and on the other hand demonstrate that the findings from the different methods are not contradicting each other. From direct comparison of the methods discussed in Figures 2, 3, 4, and 5 (of the revised manuscript), the results from the methods for the identical aerosol system are compared and therefore the observed differences can be directly contributed to the differences of the methods. This study therefore provides valuable new insights about the methods (especially for TD-DMA these points have not been established before).

About time resolution: since the four techniques have very significantly different time resolutions, it should be very careful to compare the chemical compositions obtained, especially for a typical nucleation experiment, where the particle size (mass) distributions and gas-phase chemistry are always changing. I could argue that the different observations from the four techniques may be simply because they are looking at different samples. Of course, there is no perfect instrument, so how to align the timelines of the four techniques to make more direct intercomparisons should be discussed.

Many thanks for this important comment. We realized that we did not provide enough details in how the comparison was done. In Section 2.2.1, we only mentioned that the comparison period is based on the TD-DMA and FILTER collection times. Nevertheless, we recognize Figure S1 can be confusing. In order to better clarify how we intercompared the methods, we have updated Section 2.2.1, and moved Figure S1 into the main text (now as a Fig. 1). Additionally, we created a new Figure S1, and a table with the information about the collection times and parameters related to the particle sample for the purpose of the comparison.

Section 2.2.1 was adjusted:

In order to align the sampling times for the different techniques and perform a more direct particle-phase comparison, we selected as a reference the TD-DMA and FILTER collection times. Thus, for the comparison at -30 °C and -50 °C, EESI-TOF particle signals were averaged, and FIGAERO particle signals were integrated during the period where the TD-DMA collected particles (~3 and 5 hours, respectively). While for the comparison at -10 °C, the EESI-average and FIGAERO-

integration period corresponded to the time where the particles were collected with the FILTER for the offline analysis (~17 hours).

Figure 1 provides an overview of a representative experiment at -30 °C. The overview of the experiments at -10 °C and -50 °C are shown in Fig. S1 in the supplement. Table 2 summarizes the sampling conditions during the experiments reported in this study (for the purpose of the intercomparison), including the particle number concentration, mass concentration and median mass diameter (MMD) calculated from the SMPS. The MMD indicates the particle size measured by the SMPS for which 50 % of the aerosol mass is contained in smaller particles and 50 % is contained in larger particles. From Table 2 it can be seen that for the experiments at -30 °C and -50 °C  $MMD_{av} < 100$  nm, while for the experiment at -10 °C,  $MMD_{av} \sim 106$  nm.

Figure 1 has been updated in order to provide more information about the sample size:

Figure 1 shows a representative experiment at -30 °C in which EESI-TOF, FIGAERO and TD-DMA measured simultaneously. In Figure 1a, we added the mass median diameter (MMD), this parameter shows the particle diameter measured by the SMPS for which 50 % of the aerosol mass is contained in smaller particles and 50 % is contained in larger particles. During the experiment at -30 °C the MMD is smaller than 100 nm. Regarding the sampling times, we have added shadows into Figure 1d and e, to indicate the sample size period that was considered for the comparison.

As shown in Fig. 1f, the TD-DMA collected particles during the first hours of the particle nucleation event. For the particle phase comparison at -30 °C, EESI-TOF particle signals were averaged and FIGAERO signals were integrated during the TD-DMA collection time, as well as at -50 °C. While at -10 °C, the comparison period corresponded to the time where the particles were collected with the FILTER for the offline analysis.





Figure 1. Experimental overview of a representative biogenic new particle formation experiment ( $\alpha$ -pinene ozonolysis at  $-30$  °C and 20 % RH). (a) Mixing ratio in ppbv for the precursor gases,  $\alpha$ -pinene and ozone. (b) Particle size distribution measured by the SMPS; the color scale represents the log 10 of the normalized particle concentration per cubic centimeter ( $\text{cm}^{-3}$ ). The median mass diameter (MMD) is shown with a black dashed line. (c) Particle number concentration in  $\text{cm}^{-3}$  measured by the CPC with a cut-off diameter of 2.5 nm and mass concentration in  $\mu\text{g m}^{-3}$  (obtained by integrating the normalized mass concentration from the SMPS). (d) Particle-phase signal measured continuously by the EESI-TOF, the gray shaded area refers to the period where the EESI-TOF was averaged for the intercomparison with TD-DMA and FIGAERO. (e) Particle-phase measured by FIGAERO, the gray shaded areas refer to the particle collection period and the yellow shaded areas to the desorption period. FIGAERO measured in a semicontinuous mode, namely 15-minute particle collections followed by 15-minute desorption periods. In order to intercompare with EESI-TOF and TD-DMA, FIGAERO signals were integrated during the period where the TD-DMA collected particles ( $\sim 3$  hours), seven FIGAERO particle samples were integrated during the 3 hours comparison period. (f) Particle-phase measured by the TD-DMA; The TD-DMA collection period was approximately 3 hours while the desorption period lasted around 1 minute followed by a second heating for estimating the background.



Besides the representative experiment shown in Figure 1, we added a new Figure (Fig. S1), which shows the size distribution for experiments at  $-10\text{ }^{\circ}\text{C}$  and  $-50\text{ }^{\circ}\text{C}$ .



Figure S1. Experimental overview of biogenic new particle formation experiments performed at  $-10\text{ }^{\circ}\text{C}$  (left) and  $-50\text{ }^{\circ}\text{C}$  (right). Figures (a) and (d), show the mixing ratio in ppbv for the precursor gases,  $\alpha$ -pinene, and ozone at  $-10\text{ }^{\circ}\text{C}$  and  $-50\text{ }^{\circ}\text{C}$ , respectively. Figures (b) and (e) particle size distribution measured by the SMPS; the color scale represents the log 10 of the normalized particle concentration per cubic centimeter ( $\text{cm}^{-3}$ ). The median mass diameter (MMD) is shown with a black dashed line. Figures (c) and (f), particle number concentration in  $\text{cm}^{-3}$  measured by the CPC with a cut-off diameter of 2.5 nm and mass concentration in  $\mu\text{g m}^{-3}$  (obtained by integrating the normalized mass concentration from the SMPS), the gray shaded areas refer to the particle collection period used for the comparison with EESI-TOF and FIGAERO. The sample collection period for the intercomparison was determined by the FILTER at  $-10\text{ }^{\circ}\text{C}$  and by the TD-DMA at  $-50\text{ }^{\circ}\text{C}$ .

To summarize, we introduce a new table (Table 2) into the main text.

**Table 2.** Sample size conditions during the experiments performed at  $-30\text{ }^{\circ}\text{C}$ ,  $-10\text{ }^{\circ}\text{C}$  and  $-50\text{ }^{\circ}\text{C}$ . For the purposes of this intercomparison study, the sampling times were aligned base on the TD-DMA and FILTER collection times.

| Experiment                    | Instruments intercompared    | Collection time / Comparison period (TD-DMA or FILTER) | Particle number concentration average* $\text{CPC}_{2.5}$ [ $\text{cm}^{-3}$ ] | Mass concentration average* SMPS [ $\mu\text{g cm}^{-3}$ ] | Median mass diameter (MMD) average*, max** [nm] |
|-------------------------------|------------------------------|--------------------------------------------------------|--------------------------------------------------------------------------------|------------------------------------------------------------|-------------------------------------------------|
| $-30\text{ }^{\circ}\text{C}$ | TD-DMA, EESI-TOF and FIGAERO | ~3 hours                                               | 4.5e+04                                                                        | 1.70                                                       | 51, 82                                          |
| $-10\text{ }^{\circ}\text{C}$ | FILTER, EESI-TOF and FIGAERO | ~17 hours                                              | 1.0e+04                                                                        | 1.24                                                       | 106, 147                                        |
| $-50\text{ }^{\circ}\text{C}$ | TD-DMA, EESI-TOF and FIGAERO | ~5 hours                                               | 3.6e+04                                                                        | 1.67                                                       | 66, 106                                         |

\*Average during the sample collection period. \*\*maximum value during the sample collection period

About aerosol size: I think more details should be provided about how TD-DMA collects all sub-100 nm particles since DMA is designed to do size selection. Also, from Fig. S1, it looks like about 4 hours later, the particle size distribution has two modes. How does the sampling work during this period?

Although the TD-DMA is designed to perform size-selection, for the present study we conducted non-size-selection in order to maximize the mass collection and to be comparable to the other methods that do not select the particle size.

We added to Section 2.1.2 how the TD-DMA works in case of size selection, as well as the parameters we consider for performing either size or non-size-selection measurements.

The TD-DMA can perform size-resolved and non-size-resolved measurements. In any case, the particles are first charged by an X-Ray source and then transferred to the differential mobility analyzer (DMA) unit. When a size-resolved measurement is desired, a specific voltage is applied to the central electrode inside the DMA unit. Subsequently, a sheath flow will carry only particles with specific electrical mobility and will conduct them through the DMA. In contrast, during a non-size-resolved measurement, no voltage to the central electrode and no sheath-flow are applied, and a fraction of the particles charged by the X-ray source will pass through the DMA unit. For the experiments reported in the present study, we performed non-size-resolved measurements in order to maximize the mass collected and to be comparable to the other methods that do not perform size selection.

About PMF analysis and scientific findings: what are the samples analyzed by PMF? Are they from the same experiment (Fig. S1) or are they compiled from different experiments (-50 C, -30 C, -10 C)? Are the PMFs different in different experiments? What new science can be learned from them? This is a very technical manuscript with few discussions about the science that we can learn from the intercomparison. It is better to make some conclusive scientific statements at the end of Section 3.2.1, just like the paragraph in Line 317.

The PMF analysis was only applied to the experiment at -30 °C and to the methods based on thermal desorption.

This is accordingly mentioned in Section 2.2.2

We therefore applied the same procedure as Buchholz et al. (2020) to the TD-DMA and FIGAERO thermal desorption profiles (for the  $\alpha$ -pinene oxidation experiment at -30 °C and 20 % RH only). For the analysis, we processed separately 1-second TD-DMA and 1-second FIGAERO thermograms.

The samples analyzed by PMF comprise two data sets: the TD-DMA thermogram and a representative FIGAERO thermogram. Both thermograms have been background subtracted. Further details are given in Section 2.2.2.

For the analysis, we processed separately 1-second TD-DMA and 1-second FIGAERO thermograms. Since the FIGAERO measures in a semi-continuous mode, we chose a

representative thermogram. Both TD-DMA and FIGAERO data sets were background subtracted. For the TD-DMA background, we used the second heating cycle that is performed immediately after the first heating (described in Section 2.1.2). For the FIGAERO background, we used a period where no significant particle load was present in the chamber (at the beginning of the experiment).

We agree that it would be beneficial to analyze with PMF multiple samples at different temperatures and conditions. Nevertheless, answering the question of how the temperature or relative humidity affect the results obtained by PMF is beyond our scope for the present manuscript. We are further investigating these effects in a forthcoming study.

In the present work, we applied for the first time PMF to TD-DMA data and found that thermal decomposition does play an important role. Moreover, we found that TD-DMA and FIGAERO are in good agreement in terms of thermal behavior, even though they both apply different heating curves.

This intercomparison shows us for example how we can improve our settings to better detect these compounds. For example, increasing the FIGAERO temperature would be beneficial to evaporate all the compounds (e.g.,  $C_8H_{12}O_4$  shown in Figure 6). Or changing the resolution time (less than 1 second) during the TD-DMA desorption will give us better-defined signals.

We have added more discussion into Section 3.2.1 focus especially on  $C_8H_{12}O_4$ :

By applying PMF analysis to thermal desorption data we observed that often, several factors are needed to explain the behavior of a single ion. One example is shown in the thermal profile of  $C_8H_{12}O_4$  for both FIGAERO and TD-DMA (in the Supplement Fig. S11). Particularly, F4<sub>TD-DMA</sub> and F6<sub>FIGAERO</sub> explain the  $C_8H_{12}O_4$  signal at higher temperature. This is consistent with previous observations. Lopez-Hilfiker et al. (2015) reported a significant contribution of thermal decomposition to the detection of  $C_8H_{12}O_4$  in the  $\alpha$ -pinene ozonolysis system and stated that small acids present in higher-than-expected concentrations in SOA are likely entirely due to thermal decomposition. In our previous work (Caudillo et al., 2021), we presented individual results of gas- and particle-phase of the same chemical system as in this study using the same ionization and detention scheme. We found that  $C_8H_{12}O_4$  contributed ~10 times more to the particles than to the gas-phase.

Furthermore, in the present study, the presence of the other PMF factors suggests that either there are at least 3 isomers with distinguishable volatility, or that there are different thermal decomposition processes occurring at different desorption temperatures which all form  $C_8H_{12}O_4$  as a stable product. There are some studies that suggest possible decomposition pathways. For example, Hyttinen et al. (2022) investigated the two possible thermal decomposition reactions (dehydration and decarboxylation) proposed by Yang et al. (2021), and explored which reactants provide  $C_8H_{12}O_4$  as a product. They reported two isomers of  $C_8H_{12}O_4$  formed from  $C_9H_{12}O_6$  decarboxylation and one isomer formed from  $C_8H_{14}O_5$  dehydration. Certainly, the mechanisms that explain our observation remain uncertain and need to be further investigated.

About positive and negative modes: the ionization efficiency depends on the ion polarity and the molecular property. For example, (-)ESI can be more sensitive to those molecules tending to donate protons, thus the mass spectrum cannot represent the complete information of chemical composition. It will be beneficial to add some discussion about the effects of the ionization efficiency and the polarity on the completeness of aerosol chemical composition detection when comparing the fractions of compounds with different carbon numbers and volatilities.

Thanks for the suggestion, we have added this in Section 3.1

For the methods utilizing electrospray ionization (EESI-TOF and UHPLC-HESI-HRMS), the polarity plays an important role. The EESI-TOF ran in the positive mode, allowing the SOA species to be detected as adducts with  $\text{Na}^+$ . While HESI utilized in the offline method ran in the negative mode, in which molecular ions are produced by deprotonation. Surdu et al. (2021) used an aerosol growth model based on the condensation of organic vapors, and demonstrated that the chemical composition measured by the EESI-TOF (in the positive mode as in this study) is consistent with the expected condensed oxidation products with small differences. On the other hand, Ungeheuer et al. (2021), who utilized the UHPLC-HESI-HRMS method, reported that the detection of ester molecules was accomplished only in the positive ionization mode (1000 compounds were detected in the positive mode while only 16 were detected in the negative mode). Besides the polarity, several other factors can influence the electrospray ionization response, such as, analyte chargeability and surface activity (Cech and Enke, 2001), and therefore impact on the completeness of the chemical composition of aerosol particles.

The references have been accordingly added. Please refer to the lines 626, 830 and 842 of the revised manuscript (tracked version).

# An intercomparison study of four different techniques for measuring the chemical composition of nanoparticles

Lucía Caudillo<sup>1</sup>, Mihnea Surdu<sup>2</sup>, Brandon Lopez<sup>3</sup>, Mingyi Wang<sup>3,4</sup>, Markus Thoma<sup>1</sup>, Steffen Bräkling<sup>5</sup>, Angela Buchholz<sup>6</sup>, Mario Simon<sup>1</sup>, Andrea C. Wagner<sup>1</sup>, Tatjana Müller<sup>1,7</sup>, Manuel Granzin<sup>1</sup>, Martin Heinritzi<sup>1</sup>, Antonio Amorim<sup>8</sup>, David M. Bell<sup>2</sup>, Zoé Brasseur<sup>9</sup>, Lubna Dada<sup>2</sup>, Jonathan Duplissy<sup>9,10</sup>, Henning Finkenzeller<sup>11</sup>, Xu-Cheng He<sup>9</sup>, Houssni Lamkaddam<sup>2</sup>, Naser G. A. Mahfouz<sup>3</sup>, Vladimir Makhmutov<sup>12,13</sup>, Hanna E. Manninen<sup>14</sup>, Guillaume Marie<sup>1</sup>, Ruby Marten<sup>2</sup>, Roy L. Mauldin<sup>15,3</sup>, Bernhard Mentler<sup>16</sup>, Antti Onnela<sup>14</sup>, Tuukka Petäjä<sup>9</sup>, Joschka Pfeifer<sup>1,14</sup>, Maxim Philippov<sup>12</sup>, Ana A. Piedehierro<sup>17</sup>, Birte Rörup<sup>9</sup>, Wiebke Scholz<sup>16</sup>, Jiali Shen<sup>9</sup>, Dominik Stolzenburg<sup>9</sup>, Christian Tauber<sup>18</sup>, Ping Tian<sup>19</sup>, António Tomé<sup>20</sup>, Nsikanabasi Silas Umo<sup>21</sup>, Dongyu S. Wang<sup>2</sup>, Yonghong Wang<sup>9</sup>, Stefan K. Weber<sup>1,14</sup>, André Welti<sup>17</sup>, Marcel Zauner-Wieczorek<sup>1</sup>, Urs Baltensperger<sup>2</sup>, Richard C. Flagan<sup>4</sup>, Armin Hansel<sup>16,22</sup>, Jasper Kirkby<sup>1,14</sup>, Markku Kulmala<sup>9,10,23</sup>, Katrianne Lehtipalo<sup>9,17</sup>, Douglas R. Worsnop<sup>9,24</sup>, Imad El Haddad<sup>2</sup>, Neil M. Donahue<sup>3</sup>, Alexander L. Vogel<sup>1</sup>, Andreas Kürten<sup>1</sup>, Joachim Curtius<sup>1</sup>.

15 <sup>1</sup>Institute for Atmospheric and Environmental Sciences, Goethe University Frankfurt, Frankfurt am Main, 60438, Germany

<sup>2</sup>Laboratory of Atmospheric Chemistry, Paul Scherrer Institute, 5232 Villigen, Switzerland

<sup>3</sup>Center for Atmospheric Particle Studies, Carnegie Mellon University, Pittsburgh, PA 15213, USA

<sup>4</sup>Division of Chemistry and Chemical Engineering, California Institute of Technology, Pasadena, CA 91125, USA

<sup>5</sup>TOFWERK AG, Thun, 3600, Switzerland

20 <sup>6</sup>Department of Applied Physics, University of Eastern Finland, Kuopio, Finland

<sup>7</sup>Atmospheric Chemistry Department, Max Planck Institute for Chemistry, 55128 Mainz, Germany

<sup>8</sup>CENTRA and Faculdade de Ciências da Universidade de Lisboa, Campo Grande 1749-016, Lisboa, Portugal

<sup>9</sup>Institute for Atmospheric and Earth System Research (INAR) / Physics, Faculty of Science, University of Helsinki, 00014 Helsinki, Finland

25 <sup>10</sup>Helsinki Institute of Physics, University of Helsinki, 00014 Helsinki, Finland

<sup>11</sup>Department of Chemistry & CIRES, University of Colorado Boulder, Boulder, CO, 80309-0215, USA

<sup>12</sup>Lebedev Physical Institute, Russian Academy of Sciences, 119991, Moscow, Russia

<sup>13</sup>Moscow Institute of Physics and Technology, Moscow, 117303, Russia

<sup>14</sup>CERN, 1211 Geneva, Switzerland

30 <sup>15</sup>Department of Atmospheric and Oceanic Sciences, University of Colorado Boulder, Boulder, CO 80309, USA

<sup>16</sup>Institute for Ion and Applied Physics, University of Innsbruck, 6020 Innsbruck, Austria

<sup>17</sup>Finnish Meteorological Institute, 00560 Helsinki, Finland

<sup>18</sup>Faculty of Physics, University of Vienna, 1090 Vienna, Austria

<sup>19</sup>Beijing Weather Modification Office, China

35 <sup>20</sup>IDL, Universidade da Beira Interior, R. Marquês de Ávila e Bolama, Covilhã, 6201-001, Portugal

<sup>21</sup>Institute of Meteorology and Climate Research, Karlsruhe Institute of Technology, Karlsruhe, Germany

<sup>22</sup>Ionic Analytik GmbH, 6020 Innsbruck, Austria

<sup>23</sup>Aerosol and Haze Laboratory, Beijing Advanced Innovation Center for Soft Matter Science and Engineering, Beijing University of Chemical Technology, Beijing, 100029, P.R. China

40 <sup>24</sup>Aerodyne Research, Billerica, MA 01821 USA

*Correspondence to:* Lucía Caudillo (lucia.caudillo@iau.uni-frankfurt.de) and Joachim Curtius (curtius@iau.uni-frankfurt.de)

45

50

## Abstract.

Currently, the complete chemical characterization of nanoparticles (<100 nm) represents an analytical challenge, since these particles are abundant in number but have negligible mass. Several methods for particle-phase characterization have been recently developed to better detect and infer more accurately the sources and fates of ~~sub-100 nm~~ ultra-fine particles, but a detailed comparison of different approaches is missing. Here we report on the chemical composition of secondary organic aerosol (SOA) nanoparticles from experimental studies of  $\alpha$ -pinene ozonolysis at -50 °C, -30 °C, and -10 °C, and inter-compare the results measured by different techniques. The experiments were performed at the Cosmics Leaving OUtdoor Droplets (CLOUD) chamber at the European Organization for Nuclear Research (CERN). The chemical composition was measured simultaneously by four different techniques: 1) Thermal Desorption-Differential Mobility Analyzer (TD-DMA) coupled to a  $\text{NO}_3^-$  chemical ionization-atmospheric-pressure-interface-time-of-flight (CI-API-TOF) mass spectrometer, 2) Filter Inlet for Gases and AEROsols (FIGAERO) coupled to an I high-resolution time-of-flight chemical-ionization mass spectrometer (HRTof-CIMS), 3) Extractive Electrospray  $\text{Na}^+$  Ionization time-of-flight mass spectrometer (EESI-TOF), and 4) Offline analysis of filters (FILTER) using Ultra-high-performance liquid chromatography (UHPLC) and heated electrospray ionization (HESI) coupled to an Orbitrap high-resolution mass spectrometer (HRMS). Intercomparison was performed by contrasting the observed chemical composition as a function of oxidation state and carbon number, by ~~estimating~~ calculating the volatility and comparing the fraction of volatility classes, and by comparing the thermal desorption behavior (for the thermal desorption techniques: TD-DMA and FIGAERO) and performing positive matrix factorization (PMF) analysis for the thermograms. We found that the methods generally agree on the most important compounds that are found in the nanoparticles. However, they do see different parts of the organic spectrum. We suggest potential explanations for these differences: thermal decomposition, aging, sampling artifacts, etc. We applied PMF analysis and found insights of thermal decomposition in the TD-DMA and the FIGAERO.

## 1 Introduction

So far there is no well-established instrument and technique to measure the complete chemical composition of ultrafine (< 100 nm) Secondary Organic Aerosol (SOA) particles. However, several analytical techniques have recently been developed in order to better advance our understanding on their chemistry. Techniques that are capable of measuring sub-30 nm particles include the Volatile Aerosol Component Analyzer (VACA) (Curtius et al., 1998), the Thermal Desorption Chemical Ionization Mass Spectrometry (TDCIMS) (Voisin et al., 2003), the Nano Aerosol Mass Spectrometer (NAMS) (Wang et al., 2006), the Aerosol time-of-flight mass spectrometer (Laitinen et al., 2009), the inlet for the size-resolved collection of aerosols (Phares and Collier, 2010), the Chemical Analyzer for Charged Ultrafine Particles (CACHUP) (Gonser and Held, 2013), the Electrostatic Precipitation-Electrospray Ionization Mass Spectrometry (EP-ESI-MS) (He et al., 2015), the Droplet Assisted Inlet Ionization (DAII) (Horan et al., 2017), and the Online Aerosol Chemical Characterization by Extractive Electrospray Ionization-Ultrahigh-Resolution Mass Spectrometer (EESI-Orbitrap) (Lee et al., 2020). Single-particle analysis by mass spectrometry methods based on aerodynamics, light scattering and laser desorption ionization are suitable for particles with larger sizes. These methods include for example, the Aerosol Mass Spectrometer (AMS) described in Jayne et al. (2000), and the suite of single particle methods described in the review by Bzdek et al. (2012). The detection of particles with  $d < 100$  nm using these techniques becomes difficult, because the scattering efficiency decreases when the particle diameter becomes smaller.

Using the Cosmics Leaving OUtdoor Droplets (CLOUD) chamber at the European Organization for Nuclear Research (CERN), we used simultaneously four different techniques for measuring the chemical composition of ultrafine particles and inter-compare the results.

1. Thermal Desorption-Differential Mobility Analyzer (TD-DMA) coupled to a  $\text{NO}_3^-$  chemical ionization-atmospheric-pressure-interface-time-of-flight (CI-API-TOF) mass spectrometer (Wagner et al., 2018);
2. Filter Inlet for Gases and AEROsols (FIGAERO) coupled to an  $\text{I}^-$  high-resolution time-of-flight chemical-ionization mass spectrometer (HRTof-CIMS) (Lopez-Hilfiker et al., 2014) ;
3. Extractive Electrospray  $\text{Na}^+$  Ionization time-of-flight mass spectrometer (EESI-TOF) (Lopez-Hilfiker et al., 2019); and,
4. Offline analysis of filters (FILTER) using Ultra-high-performance liquid chromatography (UHPLC) and heated electrospray ionization (HESI) coupled to an Orbitrap high-resolution mass spectrometer (HRMS) (Ungeheuer et al., 2021).

None of the techniques presented in this work represents the perfect instrument. In fact, a perfect instrument would be the one that is able to measure quantitatively all the hundreds of organic compounds that are present not only in the newly formed particles in the lab, but also in aerosol particles present in the ambient, i.e., with larger particles being present as well and at low mass concentration of the ultrafine particles. A perfect instrument should also be able to ~~and~~ identify the molecular structures (including their isomeric and spatial configuration) at high time resolution and in real-time. Such an ideal instrument does not exist; and at present, a combination of techniques is required for a more complete characterization of SOA (Hallquist et al., 2009).

In order to compare the techniques mentioned above and to gain insights into their limitations (e.g., due to decomposition during evaporation, different ionization techniques, etc.), we performed  $\alpha$ -pinene ozonolysis experiments at -50 °C, -30 °C and -10 °C. For the experiments at -50 °C and -30 °C TD-DMA, FIGAERO and EESI-TOF were inter-compared while for the experiment at -10 °C FILTER, FIGAERO and, EESI-TOF were inter-compared. We carried out the in-depth inter-comparison by a) comparing the observed composition as a function of oxidation state and carbon number, b) ~~estimating~~calculating the volatility and comparing the fraction of ultralow-volatility (ULVOC), extremely low-volatility (ELVOC), low-volatility (LVOC), semi-volatile (SVOC), and intermediate-volatility (IVOC) organic compounds, and c) comparing the thermograms (for the thermal desorption techniques: TD-DMA and FIGAERO), and by performing positive matrix factorization (PMF) analysis to the thermograms.

Because the four techniques provide chemical composition, and more specifically the carbon, hydrogen and oxygen content (CHO), we determined the carbon oxidation state (OSc), which is a metric for the degree of the oxidation of organic species in the atmosphere (Kroll et al., 2011). It is calculated based on the ratios O:C and H:C and is useful to describe organic mixtures upon oxidation processes. In addition, we ~~estimated~~calculated the volatility (as introduced by Donahue et al. (2011) and modified by Stolzenburg et al. (2018)), and determined to which volatility classes the detected compounds belong. Regarding the thermal desorption methods (TD-DMA and FIGAERO) we investigated the thermal behavior of the detected species. Both instruments first collect particles and subsequently the particles are evaporated in order to transfer their constituents before transferring them to the gas-phase. When a temperature ramp is applied, the species that are adsorbed on the surface gradually desorb (as represented on a thermogram). In order to evaluate whether the thermal desorption methods lead to significant decomposition during evaporation, we applied a method called positive matrix factorization (PMF) (Paatero and Tapper, 1994; Buchholz et al., 2020), in which a dataset matrix is expressed in terms of the sum of factors matrices and a residual matrix. Thermal decomposition on FIGAERO particle phase data has been reported previously. D'Ambro et al. (2019), observed that some of the major components of IEPOX (isoprene-derived epoxydiol) in SOA such as  $\text{C}_5\text{H}_{10}\text{O}_3$  and  $\text{C}_5\text{H}_{12}\text{O}_4$  are likely artifacts of thermal decomposition. Lopez-Hilfiker et al. (2015), Stark et al. (2017), Wang and Hildebrandt Ruiz (2018) have addressed the importance of considering thermal decomposition for assessing the chemical composition and volatility properties of SOA in techniques in which the aerosol is heated before or during the analysis. In this study, we evaluate thermal decomposition of TD-DMA samples for the first time and intercompare the results with FIGAERO.



135 Lastly, we present an overview on the advantages and disadvantages for the different methods. All methods presented here agreed on the most dominant compounds that are found in the nanoparticles. Nevertheless, they do see different parts of the organic spectrum. Therefore, the techniques are complementary. The four techniques described in this work are feasible for measuring [sub-100 nm SOA particles](#) and represent an important analytical development.

## 2. Methods

### 140 2.1 Experimental approach

#### 2.1.1 The CLOUD chamber experiment

We conducted experiments in the CLOUD chamber at CERN to study pure biogenic new particle formation (NPF), without the presence of nitrogen oxides (NO<sub>x</sub>). The CLOUD chamber is a stainless-steel cylinder with a volume of 26.1 m<sup>3</sup> which has been extensively described by Kirkby et al. (2011) and Duplissy et al. (2016). To create the particles, NPF was induced by continuously adding  $\alpha$ -pinene and ozone into the chamber. The monoterpene concentration was regulated by an evaporation source, in which dry nitrogen (N<sub>2</sub>) passes through an evaporator containing liquid  $\alpha$ -pinene at a precisely controlled temperature. Ozone was produced by exposing cryogenic O<sub>2</sub> to UV light and was introduced directly into the chamber via a separate line. The relative humidity was adjusted with a temperature-controlled Nafion humidifier using ultrapure Millipore water. All the precursor gases were homogeneously mixed in the chamber by two magnetically driven Teflon fans placed at the top and at the bottom of the chamber. The temperature was kept constant by an insulated thermal housing, which surrounds the chamber. The  $\alpha$ -pinene mixing ratio was measured by a proton transfer reaction time-of-flight (PTR-TOF) mass spectrometer (Graus et al., 2010; Breitenlechner et al., 2017), whereas ozone was measured by a TEI 49C ozone analyzer (Thermo Environmental Instruments). The experiments relevant for this work were performed at -50 °C, -30 °C, and -10 °C. The  $\alpha$ -pinene mixing ratio ranged between 1 and 8 ppbv and ozone was approximately 100 ppbv. [Figure S1 in the Supplement provides an overview of a representative experiment at -30 °C.](#)

Table 1 presents the most important features for the instruments used in this work. We categorize the techniques according to certain criteria: continuous or discontinuous operation mode, evaporation method, phase measured, ionization technique, reagent ion, target substances, occurrence of significant thermal decomposition and, whether the technique allows to perform size-resolved analysis of aerosol particles.

#### 160 2.1.2 Thermal Desorption-Differential Mobility Analyzer (TD-DMA) coupled to a NO<sub>3</sub><sup>-</sup> chemical ionization-atmospheric-pressure-interface-time-of-flight (CI-APi-TOF) mass spectrometer

The TD-DMA coupled to a NO<sub>3</sub><sup>-</sup> CI-APi-TOF analyzes the chemical composition of nanoparticles in a semi-continuous mode of operation. The design and characterization have been reported by Wagner et al. (2018). This method allows gas- and particle-phase measurements using the same ionization technique. Individual results of gas- and particle-phase comparison of the same chemical system as in this study were reported in Caudillo et al. (2021). While the gas-phase measurement is taking place with the CI-APi-TOF mass spectrometer, the TD-DMA samples particles from the chamber. [The TD-DMA can perform size-resolved and non-size-resolved measurements. In any case, the particles are first charged by an X-Ray source and then transferred to the differential mobility analyzer \(DMA\) unit. When a size-resolved measurement is desired, a specific voltage is applied to the central electrode inside the DMA unit. Subsequently, a sheath flow will carry only particles with specific electrical mobility and will conduct them through the DMA. In contrast, during a non-size-resolved measurement, no voltage to the central electrode and no sheath-flow are applied, and a fraction of the particles charged by the X-ray source will pass through the DMA unit. For the experiments reported in the present study, we performed non-size-resolved measurements in order to maximize the mass collected and to be comparable to the other methods that do not perform size selection.](#)



175 The particle collection takes place by electrostatic precipitation on a platinum/rhodium (90:10) filament placed  
inside the central electrode. collected on a platinum/rhodium (90:10) filament by electrostatic precipitation. After a certain  
collection time (~~in this study ~3 hours for the experiment at -30 °C, and ~5 hours for the experiment at -50 °C~~4 hours), an  
electric current is applied to the filament, which causes its direct heating. We estimate based on the filament resistance, that  
180 the temperature gradually increased up to approximately 600 °C in a period of ~1 minute (details of the heating curve will be  
discussed in Section 3.2).

The vapors that evaporate from the heated particles are carried by an N<sub>2</sub> flow to the nitrate CI-APi-TOF for chemical  
composition analysis. For chemical ionization of the vapors, nitrate reagent ions (HNO<sub>3</sub>)<sub>n</sub> NO<sub>3</sub><sup>-</sup> with n = 0-2 are created by a  
corona discharge (Kürten et al., 2011; Kürten et al., 2014). Some of the vapor molecules are ionized and subsequently  
detected by the APi-TOF mass spectrometer. A second heating cycle of the particle collecting filament is performed  
185 afterwards (without particle collection) in order to estimate the instrumental background due to the heating of the inlet line;  
this enables a more accurate determination of particle constituent signal estimation. The particle constituents are estimated  
by subtracting the second heating from the first heating. Besides the particle and background estimations, a second heating  
up to ~600 °C ensures that the filament is clean and avoids memory effects for the next measurement. With the nitrate  
ionization technique, sulfuric acid (Jokinen et al., 2012), iodic acid (He et al., 2021), methane sulfonic acid (Shen et al.,  
190 2022), and highly oxygenated molecules (Kirkby et al., 2016; Simon et al., 2020) (~~HOMs~~) can be detected.

### 2.1.3 Filter Inlet for Gases and AEROSols (FIGAERO) coupled to an I<sup>-</sup> high-resolution time-of-flight chemical-ionization mass spectrometer (HRTof-CIMS)

The Filter Inlet for Gases and AEROSols (FIGAERO) coupled to an I<sup>-</sup> high-resolution time-of-flight chemical-ionization  
mass spectrometer (HRTof-CIMS) was first described by Lopez-Hilfiker et al. (2014) and optimized for CLOUD operation  
195 conditions by Wang et al. (2020). FIGAERO uses a multi-port to measure in alternation both gas-and particle-phase  
following the same general procedure as the TD-DMA/CI-APi-TOF. While the gas-phase is analyzed, particle collection  
takes place on a polytetrafluoroethylene (PTFE) filter, and after a certain collection time (in this study 15 minutes), the filter  
is automatically moved into the ion-molecule reactor and exposed to a pure N<sub>2</sub> gas flow. The N<sub>2</sub> flow is gradually heated to  
evaporate the particles by thermal desorption using a temperature-programmed heating curve. For the measurements  
200 reported in this study, the temperature was slowly ramped from room temperature up to 150 °C in approximately 15 minutes  
(an example of the heating curve is discussed in Section 3.2). When the heating cycle ends a new collection starts, and the  
process repeats. Thus, 15-minute collection period is followed by 15-minute desorption-period, which implies two  
collections per hour (resulting in a resolution of 30 minutes). (~~an example of the heating curve is discussed in Section 3.2~~).  
The detection technique is based on iodide-molecule adduct ionization. Iodine ions I, I<sub>3</sub><sup>-</sup> and (H<sub>2</sub>O)I<sup>-</sup> are generated from a  
205 solution of methyl iodide (CH<sub>3</sub>I) and a Po-210 ion source (Lee et al., 2014). With this soft ionization technique, the  
FIGAERO HRTof-CIMS can detect intermediate oxygenated organic molecules (Wang et al., 2020; Stolzenburg et al.,  
2018; Lopez-Hilfiker et al., 2016) (~~HOMs~~), organosulfates, and inorganic acids such as sulfuric acid and nitric acid.

### 2.1.4 Extractive electrospray Na<sup>+</sup> ionization time-of-flight mass spectrometer (EESI-TOF)

The Extractive electrospray ionization time-of-flight mass spectrometer (Lopez-Hilfiker et al., 2019) is a technique used for  
210 online particle-phase measurements without batchparticle collection. This technique aims to provide the chemical  
composition of organic particles in real time (1 second). It is also possible to measure the gas-phase by using the dual  
configuration (Lee et al., 2022). In the beginning of the sampling process, the aerosol sample passes through the inlet line  
where a carbon denuder is located to remove the gas-phase molecules. The particles then collide with electrospray droplets  
and the soluble components are extracted and ionized. Then, solvent evaporation occurs in a heated stainless-steel capillary,  
215 leading to Coulomb fissioning and/or direct ion desorption. Finally, ions enter a time-of-flight mass spectrometer. The EESI-

TOF uses here an electrospray solution of pure water doped with 100 ppm NaI and is running in the positive ion mode. This enables the measurements of SOA species as adducts with Na<sup>+</sup>. ~~The electrospray droplets are evaporated as they pass through a heated stainless steel capillary via the Coulomb explosion mechanism and the analytes are detected by a time-of-flight mass spectrometer.~~ With this ionization method, ~~various-most~~ organic compounds that are relevant for atmospheric SOA particles can be analyzed, such as intermediate oxygenated organic molecules with the exception of species that are not oxygenated and organosulfates (Lopez-Hilfiker et al., 2019).

### 2.1.5 Offline analysis of filters (FILTER) using Ultra-high-performance liquid chromatography (UHPLC) and heated electrospray ionization (HESI) coupled to an Orbitrap high-resolution mass spectrometer (HRMS)

This procedure was optimized and described in detail by Ungeheuer et al. (2021). The method enhances the separation of organic compounds with high-resolution, and enables the determination of the accurate mass. The analysis consists mainly of four steps: sampling, extraction, separation, and detection.

First, the particles were collected from a flow of 5 l min<sup>-1</sup> on a 47 mm diameter Emfab™ Filter (Pall Life Science, USA) during approximately 17 hours for the experiment at -10 °C (see Table 2 and Figure S1). After sampling, the filter was stored at -18 °C to avoid possible losses by evaporation. The filter was cut into small pieces (approximately 3 x 3 mm) and extracted two times in 0.2 ml solution (mixture of 90 % water and 10 % methanol) for 20 min. After each extraction step, the extract was filtered through a syringe filter (PTFE with a pore size of 0.2 μm). For chromatographic separation a gradient of ultrapure water (eluent A, Milli-Q Reference A+, Merck Millipore) and methanol (eluent B, Optima LC/MS Grade, Fisher Scientific) was applied. Both eluents were mixed with 0.1 % formic acid (v/v) for improved chromatographic performance. The injection volume was 5 μl, the flow rate was 400 μl min<sup>-1</sup>, and the temperature was 40 °C. The gradient started with 1 % eluent B (0-0.5 min), increased linearly to 99 % B (0.5-14 min), stayed at 99 % B (14-16 min), backflushed in 1 min, and equilibrated in 3 min, resulting in a total run time of 20 min. Negative ionization mode was used for the detection, in which the molecular ions [M-H]<sup>-</sup> are produced by deprotonation. The ion source setting used for this purpose were: -3.5 kV spray voltage, 40 psi sheath gas, 8 arbitrary units auxiliary gas, and 262.5 °C capillary temperature. The scan range in full MS was 50-750 *m/z* with a mass resolving power of about 70k at *m/z* 200. For data-dependent MS<sup>2</sup> (ddMS<sup>2</sup>) the resolution was 17.5k. Fragments were produced in a higher-energy collisional dissociation (HCD) cell with stepped collision energies of 15, 30, and 45 eV.

## 2.2 Data analysis

### 2.2.1 Data processing

TD-DMA, FIGAERO and EESI-TOF ~~raw data was-were~~ processed using IGOR Pro 7 (WaveMetrics, Inc., USA) and Tofware (Version 3.1.2, Aerodyne Inc., USA). The data from the offline method was processed with Compound Discoverer 3.2 (Thermo Fisher Scientific). The postprocessing was done using MATLAB R2022a (MathWorks, Inc., USA).

TD-DMA data was corrected by the mass-dependent transmission efficiency in the mass classifier (Heinritzi et al., 2016) and normalized by the nitrate reagent ions. FIGAERO ~~raw~~ data was averaged to 1 minute and normalized by the reagent ions. EESI-TOF ~~raw~~ signals were averaged to 10 seconds and normalized by the most abundant electrospray ion (NaINa<sup>+</sup>). In order to align the sampling times for the different techniques and perform a more direct particle-phase comparison, we selected as a reference the TD-DMA and FILTER collection times. Thus, Additionally, for the comparison at -30 °C and -50 °C, EESI-TOF particle signals were averaged, and FIGAERO particle signals were integrated data was averaged during the period where the TD-DMA collected particles (~3 and 5 hours, respectively). While for the comparison at -10 °C, the EESI-average and FIGAERO-integration period corresponded to the time where the particles were collected with the FILTER for the offline analysis (~17 hours).

Figure 1 provides an overview of a representative experiment at -30 °C. The overview of the experiments at -10 °C and -50 °C are shown in Fig. S1 in the supplement. Table 2 summarizes the sampling conditions during the experiments reported in this study (for the purpose of the intercomparison), including the particle number concentration, mass concentration and median mass diameter (MMD) calculated from the SMPS. The MMD indicates the particle size measured by the SMPS for which 50 % of the aerosol mass is contained in smaller particles and 50 % is contained in larger particles. From Table 2 it can be seen that for the experiments at -30 °C and -50 °C  $MMD_{av} < 100$  nm, while for the experiment at -10 °C,  $MMD_{av} \sim 106$  nm. The postprocessing was done using MATLAB R2022a (MathWorks, Inc., USA).

### 2.2.2 Positive matrix factorization (PMF) analysis

One of the main questions we want to answer in this work is whether the thermal desorption methods (TD-DMA and FIGAERO) experience significant decomposition during the desorption process. To answer this question, we utilized positive matrix factorization (PMF) analysis. This method was originally described by Paatero and Tapper (1994) for analyzing time series of variable (e.g. mass spectra data) from ambient observations, and it was implemented by Buchholz et al. (2020) to thermal desorption data for identifying different processes during particle evaporation. We therefore applied the same procedure as Buchholz et al. (2020) to the TD-DMA and FIGAERO thermal desorption profiles (for the  $\alpha$ -pinene oxidation experiment at -30 °C and 20 % RH only). For the analysis, we processed separately 1-second TD-DMA and 1-second FIGAERO thermograms. Since the FIGAERO measures in a semi-continuous mode, we chose a representative thermogram. Both TD-DMA and FIGAERO data sets were background subtracted. For the TD-DMA background, we used the second heating cycle that is performed immediately after the first heating (described in Section 2.1.2). For the FIGAERO background, we used a period where no significant particle load was present in the chamber (at the beginning of the experiment). We considered only the organic compounds and excluded the reagent ions for this analysis. We ran the PMF software using the CNerror scheme (based on the noise of each ion) and up to 10 different solutions. 4-factor TD-DMA and 6-factor FIGAERO solutions (discussed later in Section 3.2.1) were chosen as the most interpretable results by a) comparing the residuals and by looking at which solution captured the total signal and certain species the best (e.g.,  $C_8H_{12}O_4$ ), b) by finding an equilibrium between good reconstructed signal and physically interpretable results. This means, that for the solutions presented here, likely a higher number of factors improve the residuals, nevertheless, we chose the solution with the smallest number of factors that can still provide realistic information.

## 3. Results and discussion

### 3.1 Chemical composition comparison

Figure 24 shows the  $OS_C$ , calculated as  $OS_C = 2 \times O:C - H:C$  (an approximation stated by Kroll et al. (2011)) against the number of carbon atoms for  $\alpha$ -pinene oxidation products in the particle-phase at -30 °C and 20 % RH as measured by three different techniques: TD-DMA, FIGAERO, and EESI-TOF. For all techniques, the highest intensities correspond to compounds with 10 carbon atoms ( $C_{10}$ ) for which the oxidation state varies between 0.5 and -1.5 depending on the measurement technique. Compounds with more than 10 carbon atoms were also detectable by the TD-DMA, FIGAERO and EESI-TOF. The TD-DMA and FIGAERO detected ~~also~~ compounds with less than 5 carbon atoms and  $OS_C > 0$  which, in contrast, are not detected by the EESI-TOF (this feature will be discussed in Section 3.2.1). In order to simplify the comparison, we calculated the fraction of species containing less than 10 carbon atoms ( $C_{<10}$ ), 10 carbon atoms ( $C_{10}$ ), and more than 10 carbon atoms ( $C_{>10}$ ), since this can provide an insight of the detected fraction of monomers and dimers for each technique (Figure 24d). Approximately 42 %, 32 %, and 23 % of the signals correspond to  $C_{<10}$ , 47 %, 65 % and, 53 % to  $C_{10}$  and, around 11 %, 3 %, and 24 % to  $C_{>10}$  measured by the TD-DMA, FIGAERO and EESI-TOF, respectively. Figure S2 in the Supplement displays the results for the experiments at -50 °C. In every case,  $C_{10}$  represents the highest fraction

detected by all the techniques in this experiment. Nevertheless, we do see significant differences between the techniques for  $C_{<10}$ ,  $C_{10}$ , and  $C_{>10}$ .

The chemical ionization utilized by the TD-DMA (nitrate,  $\text{NO}_3^-$ ) is more sensitive towards highly oxygenated species, while the FIGAERO (iodide, I) detects intermediately oxygenated species with higher sensitivity. In Figures S3 and S4 in the Supplement, we present the results (number of oxygen atoms vs number of carbon atoms) at  $-30^\circ\text{C}$  and  $-50^\circ\text{C}$ , respectively. From the figures (S3 and S4) we observe that more oxygenated species contribute more to the total signal on TD-DMA than in FIGAERO, this observation is consistent with the sensitivity that one would expect according to the chemical ionization. The electrospray ionization ( $\text{Na}^+$ ) for the EESI-TOF is usually more sensitive towards intermediate oxygenated species, even though in the results presented here, it seems to capture very well the whole spectrum.

Besides the reagent ion selectivity, several factors can explain the quantitative differences. For example, both the TD-DMA and FIGAERO detect a lower fraction of  $C_{>10}$  (11 % and 3 % compared to 24 % for the EESI-TOF). The TD-DMA and FIGAERO techniques are based on thermal desorption, which may cause decomposition of thermally unstable compounds during evaporation (as discussed in more detail in Section 3.2.1). On the other hand, the resulting fractions of  $C_{>10}$  can be influenced by the ionization method employed: chemical ionization and electrospray are soft ionization techniques, for which one can expect little fragmentation. Thus, we presume that thermal decomposition during evaporation could be the most significant factor that explain these differences.

Figure 32 presents the results for the experiment conducted at  $-10^\circ\text{C}$  ( $\alpha$ -pinene oxidation products at 80 % RH) for particles collected on a FILTER (Fig. 32a) and later analyzed by the UHPLC-HESI-HRMS method, and as measured by the FIGAERO and EESI-TOF (Fig. 32b and 32c, respectively). Overall, fewer compounds are detected by UHPLC-HESI-HRMS than by FIGAERO and EESI-TOF. The highest intensities in Fig. 32a (FILTER) correspond to  $\text{C}_8\text{H}_{12}\text{O}_4$ ,  $\text{C}_9\text{H}_{14}\text{O}_4$ ,  $\text{C}_{10}\text{H}_{16}\text{O}_{3-6}$ ,  $\text{C}_{17}\text{H}_{26}\text{O}_8$ , and  $\text{C}_{19}\text{H}_{28}\text{O}_7$ . Ions with the same formulas are also detected by the FIGAERO and EESI-TOF, but the contribution to the total signal differs. The results at  $-10^\circ\text{C}$  (number of oxygen atoms vs number of carbon atoms) are shown in Figure S5 in the Supplement. By applying the UHPLC-HESI-HRMS method, it is possible to distinguish between compounds with identical chemical formula (isomers). For the experiment reported here, two isomers for  $\text{C}_8\text{H}_{12}\text{O}_4$ ,  $\text{C}_{10}\text{H}_{16}\text{O}_3$ , and  $\text{C}_{10}\text{H}_{16}\text{O}_5$ , as well as three isomers for  $\text{C}_{10}\text{H}_{16}\text{O}_4$  and  $\text{C}_{10}\text{H}_{16}\text{O}_6$  were detected. The detection of these isomers is enabled by the chromatographic separation (their interaction with a reversed-phase column results in different retention times and therefore makes the separation feasible). However, complementary experiments are needed to investigate the molecular structure. Furthermore, Figure 32d shows the contributions of the  $C_{<10}$ ,  $C_{10}$  and  $C_{>10}$  fractions to the total signal for the FILTER, FIGAERO and EESI-TOF. At  $-10^\circ\text{C}$ , the fraction of compounds with more than 10 carbon atoms ( $C_{>10}$ ) has the smallest contribution to the total signal (14 %, 5 % and, 24 % for the FILTER, FIGAERO and EESI-TOF, respectively). The fractions  $C_{<10}$  and  $C_{10}$  do not seem to have a clear tendency, they both contribute substantially to the total signal in each technique.

For the methods utilizing electrospray ionization (EESI-TOF and UHPLC-HESI-HRMS), the polarity plays an important role. The EESI-TOF ran in the positive mode, allowing the SOA species to be detected as adducts with  $\text{Na}^+$ . While HESI utilized in the offline method ran in the negative mode, in which molecular ions are produced by deprotonation. Surdu et al. (2021) used an aerosol growth model based on the condensation of organic vapors, and demonstrated that the chemical composition measured by the EESI-TOF (in the positive mode as in this study) is consistent with the expected condensed oxidation products with small differences. On the other hand, Ungeheuer et al. (2021), who utilized the UHPLC-HESI-HRMS method, reported that the detection of ester molecules was accomplish only in the positive ionization mode (1000 compounds were detected in the positive mode while only 16 were detected in the negative mode). Besides the polarity, several other factors can influence the electrospray ionization response, such as, analyte chargeability and surface activity (Cech and Enke, 2001), and therefore impact on the completeness of the chemical composition of aerosol particles.

We ~~estimated~~~~calculated~~ the volatilities of the detected particle-phase compounds and associated them with defined volatility classes. We used the parametrization introduced in Donahue et al. (2011) and modified by Stolzenburg et al. (2018). This approach has been also discussed in Simon et al. (2020), and Wang et al. (2020). The volatility was ~~approximated~~~~calculated~~ from the number of carbon and oxygen atoms in the specific molecules, and it was first defined at 300 K. By using the Clausius–Clapeyron equation, the volatility was then shifted according to the corresponding experimental temperature. The evaporation enthalpy was approximated according to Donahue et al. (2011) and Epstein et al. (2009). Thereafter the volatility was associated with any of the following classes: ultralow-volatility (ULVOC), extremely low-volatility (ELVOC), low-volatility (LVOC), semi-volatile (SVOC), and intermediate-volatility (IVOC) organic compounds.

Figures ~~43~~ and ~~54~~ show the contribution of each volatility class to the total particle signal for the corresponding experiment and for each technique. The results at - 50 °C are reported in the Figure S6 in the Supplement. For the experiment at -30 °C (Fig. ~~43~~), LVOC constitute the higher fraction for the TD-DMA, FIGAERO and, EESI-TOF. EESI-TOF detects the highest fraction of ULVOC (~12 % compared to 6 %, and 2 % measured by TD-DMA and FIGAERO, respectively). An IVOC fraction (~8 %) is only detected by the EESI-TOF. At -10 °C (Figure ~~54~~), semi-volatile organic compounds (SVOC) contribute the most to the total particle signal for the FILTER, FIGAERO and EESI-TOF. Very small fractions of ULVOC are also detected by all the techniques. The EESI-TOF detects a higher fraction of IVOC (20 %) than FILTER and FIGAERO (2 % and 4 %), respectively. Taking into account the particle load (~1-3 ug m<sup>-3</sup>) and size of the particles (diameter < 100 nm), it is possible that a significant fraction of IVOC measured by the EESI-TOF results from measurement artefacts, as seen in previous studies using EESI (Surdu et al., 2021). Several reasons (or a combination of them) can explain this feature: a) the Na<sup>+</sup> ionization technique may be more sensitive to lower oxygenated organic compounds than the I<sup>-</sup> or NO<sub>3</sub><sup>-</sup> techniques; b) likely, some amount of the gas-phase broke through the charcoal denuder (although its efficiency is > 99 %) and reached the detector. Lee et al. (2021a) reported that the EESI-TOF is more sensitive toward gas-phase analytes as compared to their particle-phase counterparts and, c) it can possibly occur some ion-induced fragmentation.

Overall, we observed that the contribution of the lowest volatility classes (ULVOC, ELVOC and LVOC) increases as the temperature decrease. This observation reflects two opposing temperature effects, as discussed in Ye et al. (2019) based on FIGAERO results: autoxidation and thus the extent of oxidation is reduced at low temperature, but any given compound is much less volatile at low temperature because of the strong dependency between saturation concentration and temperature.

### 3.2 Thermal desorption methods: TD-DMA and FIGAERO

Figure 6 shows the thermograms obtained by FIGAERO and TD-DMA for three different species detected in the  $\alpha$ -pinene ozonolysis experiment at -30 °C. Fig. 5a shows that the C<sub>8</sub>H<sub>12</sub>O<sub>4</sub> signal measured by both FIGAERO and TD-DMA is broad and exhibits a multimodal behavior, two maxima are observed at approximately 50-60 °C and at ~120-150 °C. As described in Section 2, the FIGAERO temperature is slowly ramped up to 150 °C in approximately 15 minutes while the TD-DMA temperature increased up to 600 °C in approximately 1 minute. From Fig. 6a it can be seen at ~250 °C the C<sub>8</sub>H<sub>12</sub>O<sub>4</sub> signal measured by the TD-DMA reached background levels. This might suggest that higher than 150 °C FIGAERO temperatures are needed for completely evaporating this SOA component collected at -30 °C. In contrast, Fig. 6b and c show that the normalized intensity of C<sub>9</sub>H<sub>14</sub>O<sub>4</sub> and C<sub>10</sub>H<sub>16</sub>O<sub>6</sub> first increased reached a maximum at around 40-60 °C, and gradually decreased (sharp peak). A similar trend is observed in both FIGAERO and TD-DMA.

Additionally, we display in Fig. 6 the second TD-DMA heating. A second heating is performed immediately after the first heating, without particle collection. This performance allows us to estimate the signal coming from the particles and the signal coming from the background due to the inlet line. From the background measurement, it can be seen that the particle constituents measured by the TD-DMA have been efficiently evaporated.



Hyttinen et al. (2022) reported the  $T_{\max}$  values of several particle-phase compounds measured by FIGAERO during  $\alpha$ -pinene ozonolysis experiments. The reported values for  $C_8H_{12}O_4$ ,  $C_9H_{14}O_4$ , and  $C_{10}H_{16}O_6$  are  $\sim 80$  °C,  $\sim 73$  °C, and  $\sim 61$  °C. These values do not distant from the ones measured by both TD-DMA and FIGAERO during the experiment reported here, with the exception of the second maxima observed in  $C_8H_{12}O_4$ .

Figure 5 shows the thermograms obtained by the FIGAERO and TD-DMA for the species  $C_8H_{12}O_4$ ,  $C_9H_{14}O_4$  and  $C_{10}H_{16}O_6$  detected in the  $\alpha$  pinene ozonolysis experiment at  $30$  °C. In Fig. 5a, c and e, we show a representative thermal desorption profile measured by FIGAERO. During the desorption time ( $\sim 15$  minutes), the normalized intensity of  $C_9H_{14}O_4$  and  $C_{10}H_{16}O_6$  first increased, reached a maximum at about  $50-60$  °C, and then gradually decreased (Fig. 5c and e). In contrast,  $C_8H_{12}O_4$  (Fig. 5a) shows two maxima (at  $\sim 50-60$  °C and  $\sim 120$  °C), which causes a broader signal. In addition, (in Fig. 5a) at  $T > 120$  °C, the signal intensity stays high. In Figure 5b, d and f, we present the TD-DMA thermograms. Two heating cycles are performed in order to estimate the signal coming from the particles and the signal coming from the background due to the inlet line. Based on the filament resistance, we estimated that the temperature gradually increased up to approximately  $600$  °C in a period of  $\sim 1$  minute. In the first heating cycle, the normalized intensity of  $C_9H_{14}O_4$  and  $C_{10}H_{16}O_6$  (Fig. 5d and f) rapidly increased, reached a maximum and subsequently decreased (sharp peak). As in Fig. 5a, the thermal profile of  $C_8H_{12}O_4$  in TD-DMA (Fig. 5b) shows a broadened signal with a multimodal behavior, in which the  $C_8H_{12}O_4$  signal at  $\sim 250$  °C reached background levels. In the second heating cycle (performed immediately afterwards, without particle collection), the normalized intensity remains stable and close to zero. The particle signal is estimated by subtracting the second heating from the first heating.

### 3.2.1 Positive matrix factorization results

The results of the PMF analysis of the TD-DMA data are shown in Figure 76 which contains the factor mass spectra (Fig. 76a-d), the factor thermograms (Fig. 76e), and the contribution of each factor to the total signal (Fig. 76f). We found that four factors are the best choice to reconstruct the TD-DMA data and to provide the most interpretable results (the residuals are shown in Fig. S7 in the Supplement). We numbered the factors according to their peak desorption temperatures (Fig. 76e). F1<sub>TD-DMA</sub> which desorbs at the very first stages of the heating cycle, includes organic compounds with molecular masses between  $150$  and  $250$  Da ( $M_{av} = 211.6$  Da), with a carbon, hydrogen and oxygen average content ( $CHO_{ac}$ ) of  $9.2$ ,  $14.6$  and  $5.4$ , respectively. F1<sub>TD-DMA</sub> contains mainly compounds in the monomer region (see Fig. S8 in the Supplement). F2<sub>TD-DMA</sub> desorbs right after F1<sub>TD-DMA</sub>. The mass average ( $M_{av}$ ) is  $230.7$  Da and the  $CHO_{ac}$  is  $10.0$ ,  $16.1$  and  $5.9$ . Compounds in the monomer region also contribute to this factor (see Fig. S8 in the Supplement). F3<sub>TD-DMA</sub> shows a clear contribution of both monomers and dimers for the time when the time series shows a broadened peak.  $CHO_{ac}$  is  $10.8$ ,  $16.7$  and  $5.5$  and  $M_{av} = 234.5$  Da. Lastly, F4<sub>TD-DMA</sub> is dominated ( $\sim 60$  % of the signal intensity) by a high signal with molecular mass of  $172.18$  Da, which corresponds to  $C_8H_{12}O_4$ . This is reflected by lower values of  $CHO_{ac}$  and  $M_{av}$  compared to the other factors ( $CHO_{ac} = 8.6$ ,  $12.8$ , and  $4.5$ ,  $M_{av} = 188.2$  Da). By looking closer into F4<sub>TD-DMA</sub> (Fig. 76d), we observe that some compounds with mass  $< 200$  Da also contribute to this factor. By integrating each factor thermogram (Fig. 76e), we calculated that F1<sub>TD-DMA</sub> and F2<sub>TD-DMA</sub> contribute to  $\sim 70$  % of the total signal while F3<sub>TD-DMA</sub> and F4<sub>TD-DMA</sub> make up  $\sim 30$  % of the total signal as shown in Figure 76f.

For the purpose of comparison on the other hand, we present in Figure 87 the results from applying PMF to the FIGAERO thermal desorption data for a solution with 6 factors. Figure 87a-f contains the factor mass spectra, Fig. 87g the factor thermograms, and Fig. 87h shows the contribution of each factor to the total particle signal (the residuals and the factors expressed in terms of their oxygen content and mass are shown in Figures S9 and S10 in the Supplement, respectively). F1<sub>FIGAERO</sub>, F2<sub>FIGAERO</sub> and F3<sub>FIGAERO</sub> (Fig. 87a-c) show a distinct contribution from monomers, and similar mass spectra, but display different thermal profiles (in Fig. 87g). Specifically, F2<sub>FIGAERO</sub> and F3<sub>FIGAERO</sub> exhibit well-defined thermal profiles ( $\sim 15$  °C difference in  $T_{\max}$ ). However, F1<sub>FIGAERO</sub> shows a broader profile with no distinct maximum. We

suspect that F1<sub>FIGAERO</sub> can be related to some of the following causes to some extent: a) Limited resolution of the chosen  
425 PMF solution at  $T < 50$  °C, likely to the presence of two neighbouring factors that were not resolved completely; b)  
interference from volatile material already evaporating at the beginning of the thermogram and, c) adsorption of gaseous  
compounds. Reason b could be related to the procedure initiating the desorption, where the filter is flushed with N<sub>2</sub> at  
ambient temperature before starting the heating ramp, which would likely affect the most volatile material. F4<sub>FIGAERO</sub> and F5  
430 F<sub>FIGAERO</sub> (Fig. 87d and e) show contribution of both monomers and dimers, with a very similar CHO<sub>ac</sub> and M<sub>av</sub>. However, they  
show different thermogram behavior ( $\sim -20$  °C difference for T<sub>max</sub>, Fig 87g). F6<sub>FIGAERO</sub> shows mainly contributions from  
compounds with low mass (< 200 Da) and desorbs mainly at the very end of the heating curve. The contribution of each  
factor to the total signal is shown in Fig 87h.

As mentioned previously, we observed some factors with similar CHO<sub>ac</sub> and M<sub>av</sub> but different thermal behavior,  
possibly due to the presence of isomers. Molecules with the same composition but different structure and functional groups  
435 may exhibit different volatilities. In fact, functionality is one of the driving factors that determines volatility (Pankow and  
Asher, 2008; Wang et al., 2020). The mass spectrometry techniques reported here are not able to determine the molecular  
structure. We further note that the factors F4<sub>TD-DMA</sub> and F6<sub>FIGAERO</sub> desorb mainly at the very last stage of the heating curves,  
although they both have a clear contribution of compounds with mass < 200 Da, and one of lowest oxygen content of all  
factors (i.e., the lowest degree of oxidation). We suspect that, F4<sub>TD-DMA</sub> (Fig. 76d) and F6<sub>FIGAERO</sub> (Fig. 87g) are comprised  
440 primarily of products of thermal decomposition; the heat applied to desorb the particles instead cleaves certain chemical  
bonds in (larger) molecules before these could desorb. Small compounds are generally expected to desorb before the  
transmitted thermal energy (i.e., the desorption temperature) is high enough to cause such decomposition. However, F4<sub>TD-</sub>  
DMA and F6<sub>FIGAERO</sub> thermal profiles also exhibit a small peak at lower temperatures (observed more clearly in Fig. 87g at  $\sim$   
40-50 °C), which is likely direct desorption. This may suggest that the low temperature peak stems from monomers  
445 desorbing directly, while the broad high temperature peak represents decomposing dimers/oligomers which are then detected  
at the composition of the corresponding monomers. Previous studies applying PMF analysis to FIGAERO thermal  
desorption data also observed the presence of one or more factors dominated by thermal decomposition products for  $\alpha$ -  
pinene and sesquiterpene derived SOA (Buchholz et al., 2020; Li et al., 2021). Those studies concluded that thermal  
decomposition was the main volatilization process at desorption temperatures above 100 °C with differences between the  
450 observed SOA types.

By applying PMF analysis to thermal desorption data we observed that often, several factors are needed to explain  
the behavior of a single ion. One example is shown in the thermal profile of C<sub>8</sub>H<sub>12</sub>O<sub>4</sub> for both FIGAERO and TD-DMA (in  
the Supplement Fig. S11), ~~in which all the PMF factors contribute~~. Particularly, F4<sub>TD-DMA</sub> and F6<sub>FIGAERO</sub> explain the  
C<sub>8</sub>H<sub>12</sub>O<sub>4</sub> signal at higher temperature. This is consistent with previous observations. Lopez-Hilfiker et al. (2015) reported a  
455 significant contribution of thermal decomposition to the detection of C<sub>8</sub>H<sub>12</sub>O<sub>4</sub> in the  $\alpha$ -pinene ozonolysis system and stated  
that small acids present in higher-than-expected concentrations in SOA are likely entirely due to thermal decomposition. In  
our previous work (Caudillo et al., 2021), we presented individual results of gas- and particle-phase of the same chemical  
system as in this study using the same ionization and detention scheme. We found that C<sub>8</sub>H<sub>12</sub>O<sub>4</sub> contributed  $\sim 10$  times more  
to the particles than to the gas-phase.

460 Furthermore ~~However~~, in the present study, the presence of the other PMF factors suggests that either there are at  
least 3 isomers with distinguishable volatility, or that there are different thermal decomposition processes occurring at  
different desorption temperatures which all form C<sub>8</sub>H<sub>12</sub>O<sub>4</sub> as a stable product. There are some studies that suggest possible  
decomposition pathways. For example, Hyttinen et al. (2022) investigated the two possible thermal decomposition reactions  
(dehydration and decarboxylation) proposed by Yang et al. (2021), and explored which reactants provide C<sub>8</sub>H<sub>12</sub>O<sub>4</sub> as a  
465 product. They reported two isomers of C<sub>8</sub>H<sub>12</sub>O<sub>4</sub> formed from C<sub>9</sub>H<sub>12</sub>O<sub>6</sub> decarboxylation and one isomer formed from C<sub>8</sub>H<sub>14</sub>O<sub>5</sub>  
dehydration. Certainly, the mechanisms that explain our observation remain uncertain and need to be further investigated.

### 3.3 Discussion of Advantages and disadvantages of methods for measuring sub-100 nm SOA

470 Table 32 summarizes some advantages and disadvantages that should be considered when ~~operating—applying~~ the ~~instruments—methods~~ presented here to the measurement of laboratory-generated sub-100 nm diameter SOA. When measuring particle chemical composition, the time needed for collecting enough particles (mass) should be carefully considered. This fact becomes a challenge when analyzing nanoparticles, since the small particles do not contribute significantly to the overall SOA mass. In that regard, EESI-TOF and FIGAERO provide a faster response (every 1 second and 30 minutes, respectively) than the other two methods, and allows a nearly real time monitoring. This is especially convenient when the chemical composition changes continuously (i.e., in complex environments or during oxidative flow reactor or chamber experiments). For instance, for the experiments reported in this work (see Supplementary Fig. S1), the TD-DMA collection time was around 4 hours, the FIGAERO measured in a semicontinuous mode in which the particle collection lasted 15 minutes and was done every 30 minutes during the whole experiment. In contrast, the EESI-TOF measured continuously (every 10 seconds), whereas, for the offline analysis of FILTERS, the particles were collected during the whole experiment of ~~—8 hours~~. In addition In fact, the EESI-TOF's total particle signal exhibited a good correlation with the mass concentration calculated from the Scanning Mobility Particle Sizer (SMPS) measurements ( $r^2 > 0.94$ , Fig. S12 in the Supplementary material). Despite the fact that there is a size-dependence on EESI-TOF sensitivity, EESI-TOF sensitivity decreases as the size of the particles increases (Lee et al., 2021b).

485 ~~EESI-TOF and FIGAERO provide a faster response (every 10 seconds and every 30 minutes, respectively) than the other two methods, and allows a nearly real time monitoring. This is especially convenient when the chemical composition changes continuously (i.e., in complex environments or during oxidative flow reactor or chamber experiments). In contrast, the particle collection periods for TD-DMA and FILTER (offline analysis) were much longer and depended on the particle load and limit of detection.~~ The particle collection periods for TD-DMA and FILTER (offline analysis) were much longer and depended on the particle load and limit of detection. Besides the low time resolution, a main disadvantage of longer collection times is that aerosol aging may occur ~~during that time~~. This can potentially change the chemical composition and therefore lead to inaccurate aerosol speciation. Several studies have reported positive and negative artifacts caused by adsorption of gases on the collection surfaces, longer sampling periods, and volatilization of organic species either during 490 collection or during storage (Turpin et al., 1994; Subramanian et al., 2004; Kristensen et al., 2016).

The mass spectrometers coupled to TD-DMA and FIGAERO (nitrate CI-APi-TOF and iodide HRTof-CIMS, respectively) can perform gas-phase measurements while the particle collection takes places. EESI-TOF in the dual-configuration can measure both particle-and gas-phase quasi simultaneously. This allows for a direct comparison between 495 gas-and particle-phase. ~~Nevertheless, these~~ On the other hand, measurements that are size resolved with respect to the aerosol size distribution (between 10 to 30 nm) are also feasible by the TD-DMA (Wagner et al., 2018). For the experiments presented here, size selective measurements were not performed to maximize the collected mass and to allow the intercomparison with the other methods.

500 ~~The mass spectrometry techniques presented here (TD-DMA + nitrate CI-APi-TOF, FIGAERO + iodide HRTof-CIMS and Na<sup>+</sup>-EESI-TOF)~~ can only identify chemical formulas but with some limitations. Thus, ~~for example,~~ it is not possible for example to provide structural information or identification of isomers. In contrast, the UHPLC-HESI-HRMS offline method has the advantage of being able to distinguish between clusters, molecules, and isomers based on the chromatographic separation. Furthermore, the fragmentation pattern (via MS<sup>2</sup>-experiments) can provide hints to interpret the 505 functional groups and can be used for unambiguous compound identification. Hence, UHPLC-HRMS can provide robust analytical insight of the stable compounds.

The thermal desorption methods (TD-DMA and FIGAERO) exhibit significant thermal decomposition of compounds with desorption temperatures above 100 °C. For the EESI this seems to be less of an issue in general but in some specific studies thermal decomposition was found to be relevant (Bell et al., 2021). PMF analysis of the thermal desorption



510 data from the TD-DMA and FIGAERO could separate the contribution of products from thermal decomposition from those directly desorbing. However, even with this method, it is not possible to obtain information about the original compounds decomposing and their true volatility. The observed decomposition temperature can be used as an upper limit for volatility (i.e., their true volatility is lower than that associated with the apparent desorption temperature).

For the FILTER method, the compounds collected on the filter have to be extracted into a liquid phase for the  
515 UHPLC separation. The choice of solvents for this extraction will determine which fraction of organic compounds will be analyzed. The water-methanol mixture used in this study will extract polar, hydrophilic compounds similar to the water-soluble organic carbon category. Note that the exposure to water (or other solvents) may lead to chemical reactions, e.g., hydrolysis of (hydro) peroxides. The selective extraction and potential aqueous phase chemistry may explain the smaller number of compounds detected with the FILTER method. However, for the compounds that do get analyzed, a much deeper  
520 understanding can be achieved (e.g., separation of isomers).

The ionization technique also plays a role on the final detection. If the ionization technique is not soft enough, this can result in fragmentation and affects the final response in the detection. In principle, the ionization techniques utilized by the instruments reported here are soft, meaning that no significant fragmentation occurs during the detection. Nevertheless, the ionization efficiency is different between the techniques. For example, with the nitrate reagent ion, highly oxygenated  
525 species can be better detected, while the ionization techniques used for FIGAERO and EESI-TOF (I, and Na<sup>+</sup>, respectively) are more sensitive to intermediately oxygenated organic compounds. The UHPLC-HESI-HRMS can be operated in both polarity modes, however, and therefore detect species are either able to donate protons (in the negative mode) or form clusters with protons or sodium (in the positive mode).

The complete characterization of species in the particle-phase in terms of chemical formula and structure represents  
530 an analytical challenge. In this sense, the full identification of organic compounds is only possible by combining different techniques.

#### 4. Conclusions

In this study, we presented an overview of four different methods for measuring the chemical composition of ultrafine particles and we described their capabilities to detect organic compounds. Specifically, we reported the particle-phase  
535 composition from  $\alpha$ -pinene ozonolysis at -50 °C, -30 °C and -10 °C. In all the cases, the highest portion of detected compounds correspond to species with 10 and less than 10 carbon atoms (C<sub>10</sub>, C<sub><10</sub>). The EESI-TOF generally detected a higher fraction (compared to the other techniques: TD-DMA, FIGAERO and FILTERS) of compounds with more than 10 carbon atoms (C<sub>>10</sub>). In terms of volatility classes, EESI-TOF detected the higher fraction of ULVOC in all the experiments reported here, especially for those at lower temperatures (-50 °C and -30 °C). We presume that several factors can explain  
540 these differences, i.e., thermal decomposition of large compounds (for the thermal desorption methods), for which we applied positive matrix factorization on the thermal profiles and suggested a 4-Factor solution for TD-DMA and a 6-Factor solution for the FIGAERO. Specifically, we suspect that F4<sub>TD-DMA</sub> and F6<sub>FIGAERO</sub> might be related to thermal decomposition to some extent. The PMF factors dominated by direct desorption can be interpreted as volatility classes, characterized by their T<sub>max</sub> values (the peak in the respective temperature desorption profiles). Nevertheless, further calibration experiments  
545 are needed to determine the relation between T<sub>max</sub> and saturation concentration. With the offline method UHPLC-HESI-HRMS, we were able to verify the presence of isomers (two isomers for C<sub>8</sub>H<sub>12</sub>O<sub>4</sub>, C<sub>10</sub>H<sub>16</sub>O<sub>3</sub>, C<sub>10</sub>H<sub>16</sub>O<sub>5</sub>, and three isomers for C<sub>10</sub>H<sub>16</sub>O<sub>4</sub> and C<sub>10</sub>H<sub>16</sub>O<sub>6</sub>), which represents an important advantage over the online methods reported here.

While the methods generally agree on the most important compounds that are found in the nanoparticles, they all have their strengths and shortcomings. A major limit of these methods is that the measurements of the chemical compounds  
550 are not quantitative and only rough estimates of the exact contributions of a compound to the overall chemical composition

can be made. However, knowing the limitations of each method and using combinations of the available methods can provide deeper insights into the chemical composition and volatility of nanoparticles.

*Data availability.* Data related to this article are available upon reasonable request to the corresponding authors.

555

*Supplement* The supplement related to this article will be available online.

*Author contributions.*

L. C., M. S., B. L., M. W., S. B., T. M., M. G., Z. B., L. D., J. Du., H. F., X.-C. H., H. L., N. G. A. M., V. M., H. E. M., G.  
560 M., R. M., R. L. M., B. M., A. O., T. P., J. P., M. P., A. A. P., B. R., W. S., J. S., P. T., A. T., N. S. U., D. S. W., S. K. W., A.  
W., W. Y., M. Z.-W., U. B., J. Kir., M. K., K. L., I. E.-H., N. M. D., A. K., and J. Cu. prepared the CLOUD facility and  
measurement instruments. L. C., M. S., B. L., M. W., S. B., T. M., M. G., A. A., D. M. B., L. D., J. Du., H. F., X.-C. H., H.  
L., N. G. A. M., V. M., G. M., R. L. M., B. M., J. S., C. T., A. T., N. S. U., D. S. W., S. K. W., M. Z.-W., and J. Kir.  
collected the data. L. C., M. S., B. L., M. W., M. T., S. B., A. B., S. K. W., and J. Cu. analyzed the data. L. C., M. S., B. L.,  
565 M. W., M. T., A. B., M. Sim., A. C. W., M. H., D. M. B., L. D., T. P., D. S., R. C. F., A. H., M. K., K. L., D. W., I. E.-H., N.  
M. D., A. L. V., A. K., and J. Cu. contributed to the scientific discussion and interpretation of the results. L. C., A. B., U. B.,  
R. C. F., and J. Cu. contributed to the writing of the manuscript.

*Competing interests.* The authors declare that they have no conflict of interest.

570

*Acknowledgments.* We thank CERN for providing the CLOUD facility to perform the experiments and the CLOUD community for supporting this study. We especially would like to thank Katja Ivanova, Timo Keber, Frank Malkemper, Robert Sitals, Hanna Elina Manninen, Antti Onnela, and Robert Kristic for their contributions to the experiment.

575 *Financial support.* This work was supported by Innovative Training Networks – ITN 400 (CLOUD-Motion H2020-MSCA-ITN-2017 no. 764991 and no. 701647) and by the German Ministry of Science and Education (CLOUD-16, 01LK1601A). European Union’s Horizon 2020 research and innovation program through the ATMO-ACCESS Integrating Activity under grant agreement no. 101008004 and, by no. 895875 (“NPF-PANDA”). Deutsche Forschungsgemeinschaft (DFG; German Research Foundation) (grant no. 410009325). US National Science Foundation Award (AGS-1801280, AGS-1801574,  
580 AGS-1801897, AGS-1602086, and AGS-18801329). Swiss National Science Foundation (200020\_172602 and 20FI20\_172622). CERN/FIS-COM/0028/2019, FCT Portuguese national funding agency for science, research and technology. The Jenny and Antti Wihuri Foundation. ACCC Flagship funded by the Academy of Finland grant number 337549, Academy professorship funded by the Academy of Finland (grant no. 302958), Academy of Finland projects no. 325656, 316114, 314798, 325647 and 341349, “Quantifying carbon sink, CarbonSink+ and their interaction with air quality”  
585 INAR project funded by Jane and Aatos Erkko Foundation, Jenny and Antti Wihuri Foundation project “Air pollution cocktail in Gigacity”, European Research Council (ERC) project ATM-GTP Contract No. 742206, and the Arena for the gap analysis of the existing Arctic Science Co-Operations (AASCO) funded by Prince Albert Foundation Contract No 2859.

590

595

|600

## References

- Bell, D. M., Wu, C., Bertrand, A., Graham, E., Schoonbaert, J., Giannoukos, S., Baltensperger, U., Prevot, A. S. H., Riipinen, I., El Haddad, I., and Mohr, C.: Particle-phase processing of  $\alpha$ -pinene NO<sub>3</sub> secondary organic aerosol in the dark, *Atmos. Chem. Phys. Discuss.*, 2021, 1-28, 10.5194/acp-2021-379, 2021.
- 605 Breitenlechner, M., Fischer, L., Hainer, M., Heinritzi, M., Curtius, J., and Hansel, A.: PTR3: An Instrument for Studying the Lifecycle of Reactive Organic Carbon in the Atmosphere, *Analytical Chemistry*, 89, 5824-5831, 10.1021/acs.analchem.6b05110, 2017.
- 610 Buchholz, A., Ylisimä, A., Huang, W., Mohr, C., Canagaratna, M., Worsnop, D. R., Schobesberger, S., and Virtanen, A.: Deconvolution of FIGAERO-CIMS thermal desorption profiles using positive matrix factorisation to identify chemical and physical processes during particle evaporation, *Atmos. Chem. Phys.*, 20, 7693-7716, 10.5194/acp-20-7693-2020, 2020.
- 615 Bzdek, B. R., Pennington, M. R., and Johnston, M. V.: Single particle chemical analysis of ambient ultrafine aerosol: A review, *Journal of Aerosol Science*, 52, 109-120, <https://doi.org/10.1016/j.jaerosci.2012.05.001>, 2012.
- 620 Caudillo, L., Rörup, B., Heinritzi, M., Marie, G., Simon, M., Wagner, A. C., Müller, T., Granzin, M., Amorim, A., Ataei, F., Baalbaki, R., Bertozzi, B., Brasseur, Z., Chiu, R., Chu, B., Dada, L., Duplissy, J., Finkenzeller, H., Gonzalez Carracedo, L., He, X. C., Hofbauer, V., Kong, W., Lamkaddam, H., Lee, C. P., Lopez, B., Mahfouz, N. G. A., Makhmutov, V., Manninen, H. E., Marten, R., Massabò, D., Mauldin, R. L., Mentler, B., Molteni, U., Onnela, A., Pfeifer, J., Philippov, M., Piedehierro, A. A., Schervish, M., Scholz, W., Schulze, B., Shen, J., Stolzenburg, D., Stozhkov, Y., Surdu, M., Tauber, C., Tham, Y. J., Tian, P., Tomé, A., Vogt, S., Wang, M., Wang, D. S., Weber, S. K., Welti, A., Yonghong, W., Yusheng, W., Zauner-Wieczorek, M., Baltensperger, U., El Haddad, I., Flagan, R. C., Hansel, A., Höhler, K., Kirkby, J., Kulmala, M., Lehtipalo, K., Möhler, O., Saathoff, H., Volkamer, R., Winkler, P. M., Donahue, N. M., Kürten, A., and Curtius, J.: Chemical composition of nanoparticles from  $\alpha$ -pinene nucleation and the influence of isoprene and relative humidity at low temperature, *Atmos. Chem. Phys.*, 21, 17099-17114, 10.5194/acp-21-17099-2021, 2021.
- 625 Cech, N. B., and Enke, C. G.: Practical implications of some recent studies in electrospray ionization fundamentals, *Mass Spectrometry Reviews*, 20, 362-387, <https://doi.org/10.1002/mas.10008>, 2001.
- 630 Curtius, J., Sierau, B., Arnold, F., Baumann, R., Busen, R., Schulte, P., and Schumann, U.: First direct sulfuric acid detection in the exhaust plume of a jet aircraft in flight, *Geophysical Research Letters*, 25, 923-926, <https://doi.org/10.1029/98GL00512>, 1998.
- 635 D'Ambro, E. L., Schobesberger, S., Gaston, C. J., Lopez-Hilfiker, F. D., Lee, B. H., Liu, J., Zelenyuk, A., Bell, D., Cappa, C. D., Helgestad, T., Li, Z., Guenther, A., Wang, J., Wise, M., Caylor, R., Surratt, J. D., Riedel, T., Hyttinen, N., Salo, V. T., Hasan, G., Kurtén, T., Shilling, J. E., and Thornton, J. A.: Chamber-based insights into the factors controlling epoxydiol (IEPOX) secondary organic aerosol (SOA) yield, composition, and volatility, *Atmos. Chem. Phys.*, 19, 11253-11265, 10.5194/acp-19-11253-2019, 2019.
- Donahue, N. M., Epstein, S., Pandis, S. N., and Robinson, A. L.: A two-dimensional volatility basis set: 1. organic-aerosol mixing thermodynamics, *Atmospheric Chemistry and Physics*, 11, 3303-3318, 2011.
- 640 Duplissy, J., Merikanto, J., Franchin, A., Tsagkogeorgas, G., Kangasluoma, J., Wimmer, D., Vuollekoski, H., Schobesberger, S., Lehtipalo, K., Flagan, R. C., Brus, D., Donahue, N. M., Vehkamäki, H., Almeida, J., Amorim, A., Barnet, P., Bianchi, F., Breitenlechner, M., Dunne, E. M., Guida, R., Henschel, H., Junninen, H., Kirkby, J., Kürten, A., Kupc, A., Määttä, A., Makhmutov, V., Mathot, S., Nieminen, T., Onnela, A., Praplan, A. P., Riccobono, F., Rondo, L., Steiner, G., Tome, A., Walther, H., Baltensperger, U., Carslaw, K. S., Dommen, J., Hansel, A., Petäjä, T., Sipilä, M., Stratmann, F., Virtala, A., Wagner, P. E., Worsnop, D. R., Curtius, J., and Kulmala, M.: Effect of ions on sulfuric acid-water binary particle formation: 2. Experimental data and comparison with QC-normalized classical nucleation theory, *Journal of Geophysical Research: Atmospheres*, 121, 1752-1775, 10.1002/2015JD023539, 2016.
- 645 Epstein, S. A., Riipinen, I., and Donahue, N. M.: A semiempirical correlation between enthalpy of vaporization and saturation concentration for organic aerosol, *Environmental science & technology*, 44, 743-748, 2009.
- 650 Gonser, S. G., and Held, A.: A chemical analyzer for charged ultrafine particles, *Atmos. Meas. Tech.*, 6, 2339-2348, 10.5194/amt-6-2339-2013, 2013.
- 655 Graus, M., Müller, M., and Hansel, A.: High resolution PTR-TOF: Quantification and formula confirmation of VOC in real time, *Journal of the American Society for Mass Spectrometry*, 21, 1037-1044, 10.1016/j.jasms.2010.02.006, 2010.
- 660 Hallquist, M., Wenger, J. C., Baltensperger, U., Rudich, Y., Simpson, D., Claeys, M., Dommen, J., Donahue, N. M., George, C., Goldstein, A. H., Hamilton, J. F., Herrmann, H., Hoffmann, T., Iinuma, Y., Jang, M., Jenkin, M. E., Jimenez, J. L., Kiendler-Scharr, A., Maenhaut, W., McFiggans, G., Mentel, T. F., Monod, A., Prévôt, A. S. H., Seinfeld, J. H., Surratt, J. D., Szmigielski, R., and Wildt, J.: The formation, properties and impact of secondary organic aerosol: current and emerging issues, *Atmos. Chem. Phys.*, 9, 5155-5236, 10.5194/acp-9-5155-2009, 2009.
- 665 He, S., Li, L., Duan, H., Naqwi, A., and Hogan, C. J.: Aerosol Analysis via Electrostatic Precipitation-Electrospray Ionization Mass Spectrometry, *Analytical Chemistry*, 87, 6752-6760, 10.1021/acs.analchem.5b01183, 2015.
- 670 He, X.-C., Tham, Y. J., Dada, L., Wang, M., Finkenzeller, H., Stolzenburg, D., Iyer, S., Simon, M., Kürten, A., Shen, J., Rörup, B., Rissanen, M., Schobesberger, S., Baalbaki, R., Wang, D. S., Koenig, T. K., Jokinen, T., Samela, N., Beck, L. J., Almeida, J., Amanatidis, S., Amorim, A., Ataei, F., Baccarini, A., Bertozzi, B., Bianchi, F., Brilke, S., Caudillo, L., Chen, D., Chiu, R., Chu, B., Dias, A., Ding, A., Dommen, J., Duplissy, J., El Haddad, I., Gonzalez Carracedo, L., Granzin, M., Hansel, A., Heinritzi, M., Hofbauer, V., Junninen, H., Kangasluoma, J., Kempainen, D., Kim, C., Kong, W., Krechmer, J. E., Kvashin, A., Laitinen, T., Lamkaddam, H., Lee, C. P., Lehtipalo,

- 675 K., Leiminger, M., Li, Z., Makhmutov, V., Manninen, H. E., Marie, G., Marten, R., Mathot, S., Mauldin, R. L., Mentler, B., Möhler, O., Müller, T., Nie, W., Onnela, A., Petäjä, T., Pfeifer, J., Philippov, M., Ranjithkumar, A., Saiz-Lopez, A., Salma, I., Scholz, W., Schuchmann, S., Schulze, B., Steiner, G., Stozhkov, Y., Tauber, C., Tomé, A., Thakur, R. C., Väisänen, O., Vazquez-Pufleau, M., Wagner, A. C., Wang, Y., Weber, S. K., Winkler, P. M., Wu, Y., Xiao, M., Yan, C., Ye, Q., Ylisimiö, A., Zauner-Wieczorek, M., Zha, Q., Zhou, P., Flagan, R. C., Curtius, J., Baltensperger, U., Kulmala, M., Kerminen, V.-M., Kurtén, T., Donahue, N. M., Volkamer, R., Kirkby, J., Worsnop, D. R., and Sipilä, M.: Role of iodine oxoacids in atmospheric aerosol nucleation, *Science*, 371, 589-595, 10.1126/science.abe0298, 2021.
- 680 Heinritzi, M., Simon, M., Steiner, G., Wagner, A. C., Kürten, A., Hansel, A., and Curtius, J.: Characterization of the mass-dependent transmission efficiency of a CIMS, *Atmos. Meas. Tech.*, 9, 1449-1460, 10.5194/amt-9-1449-2016, 2016.
- Horan, A. J., Apsokardu, M. J., and Johnston, M. V.: Droplet Assisted Inlet Ionization for Online Analysis of Airborne Nanoparticles, *Analytical Chemistry*, 89, 1059-1062, 10.1021/acs.analchem.6b04718, 2017.
- 685 Hyttinen, N., Pullinen, I., Nissinen, A., Schobesberger, S., Virtanen, A., and Yli-Juuti, T.: Comparison of saturation vapor pressures of  $\alpha$ -pinene + O<sub>3</sub> oxidation products derived from COSMO-RS computations and thermal desorption experiments, *Atmos. Chem. Phys.*, 22, 1195-1208, 10.5194/acp-22-1195-2022, 2022.
- 690 Jayne, J. T., Leard, D. C., Zhang, X., Davidovits, P., Smith, K. A., Kolb, C. E., and Worsnop, D. R.: Development of an Aerosol Mass Spectrometer for Size and Composition Analysis of Submicron Particles, *Aerosol Science and Technology*, 33, 49-70, 10.1080/027868200410840, 2000.
- 695 Jokinen, T., Sipilä, M., Junninen, H., Ehn, M., Lönn, G., Hakala, J., Petäjä, T., Mauldin Iii, R. L., Kulmala, M., and Worsnop, D. R.: Atmospheric sulphuric acid and neutral cluster measurements using CI-API-TOF, *Atmos. Chem. Phys.*, 12, 4117-4125, 10.5194/acp-12-4117-2012, 2012.
- 700 Kirkby, J., Curtius, J., Almeida, J., Dunne, E., Duplissy, J., Ehrhart, S., Franchin, A., Gagné, S., Ickes, L., Kürten, A., Kupc, A., Metzger, A., Riccobono, F., Rondo, L., Schobesberger, S., Tsagkogeorgas, G., Wimmer, D., Amorim, A., Bianchi, F., Breitenlechner, M., David, A., Dommen, J., Downard, A., Ehn, M., Flagan, R. C., Haider, S., Hansel, A., Hauser, D., Jud, W., Junninen, H., Kreissl, F., Kvashin, A., Laaksonen, A., Lehtipalo, K., Lima, J., Lovejoy, E. R., Makhmutov, V., Mathot, S., Mikkilä, J., Minginette, P., Mogo, S., Nieminen, T., Onnela, A., Pereira, P., Petäjä, T., Schnitzhofer, R., Seinfeld, J. H., Sipilä, M., Stozhkov, Y., Stratmann, F., Tomé, A., Vanhanen, J., Viisanen, Y., Vrtala, A., Wagner, P. E., Walther, H., Weingartner, E., Wex, H., Winkler, P. M., Carslaw, K. S., Worsnop, D. R., Baltensperger, U., and Kulmala, M.: Role of sulphuric acid, ammonia and galactic cosmic rays in atmospheric aerosol nucleation, *Nature*, 476, 429-433, 10.1038/nature10343, 2011.
- 705 Kirkby, J., Duplissy, J., Sengupta, K., Frege, C., Gordon, H., Williamson, C., Heinritzi, M., Simon, M., Yan, C., Almeida, J., Tröstl, J., Nieminen, T., Ortega, I. K., Wagner, R., Adamov, A., Amorim, A., Bernhammer, A.-K., Bianchi, F., Breitenlechner, M., Brilke, S., Chen, X., Craven, J., Dias, A., Ehrhart, S., Flagan, R. C., Franchin, A., Fuchs, C., Guida, R., Hakala, J., Hoyle, C. R., Jokinen, T., Junninen, H., Kangasluoma, J., Kim, J., Krapf, M., Kürten, A., Laaksonen, A., Lehtipalo, K., Makhmutov, V., Mathot, S., Molteni, U., Onnela, A., Peräkylä, O., Piel, F., Petäjä, T., Praplan, A. P., Pringle, K., Rap, A., Richards, N. A. D., Riipinen, I., Rissanen, M. P., Rondo, L., Samela, N., Schobesberger, S., Scott, C. E., Seinfeld, J. H., Sipilä, M., Steiner, G., Stozhkov, Y., Stratmann, F., Tomé, A., Virtanen, A., Vogel, A. L., Wagner, A. C., Wagner, P. E., Weingartner, E., Wimmer, D., Winkler, P. M., Ye, P., Zhang, X., Hansel, A., Dommen, J., Donahue, N. M., Worsnop, D. R., Baltensperger, U., Kulmala, M., Carslaw, K. S., and Curtius, J.: Ion-induced nucleation of pure biogenic particles, *Nature*, 533, 521-526, 10.1038/nature17953, 2016.
- 715 Kristensen, K., Bilde, M., Aalto, P. P., Petäjä, T., and Glasius, M.: Denuder/filter sampling of organic acids and organosulfates at urban and boreal forest sites: Gas/particle distribution and possible sampling artifacts, *Atmospheric Environment*, 130, 36-53, <https://doi.org/10.1016/j.atmosenv.2015.10.046>, 2016.
- 720 Kroll, J. H., Donahue, N. M., Jimenez, J. L., Kessler, S. H., Canagaratna, M. R., Wilson, K. R., Altieri, K. E., Mazzoleni, L. R., Wozniak, A. S., Bluhm, H., Mysak, E. R., Smith, J. D., Kolb, C. E., and Worsnop, D. R.: Carbon oxidation state as a metric for describing the chemistry of atmospheric organic aerosol, *Nature Chemistry*, 3, 133-139, 10.1038/nchem.948, 2011.
- 725 Kürten, A., Rondo, L., Ehrhart, S., and Curtius, J.: Performance of a corona ion source for measurement of sulfuric acid by chemical ionization mass spectrometry, *Atmos. Meas. Tech.*, 4, 437-443, 10.5194/amt-4-437-2011, 2011.
- 730 Kürten, A., Jokinen, T., Simon, M., Sipilä, M., Samela, N., Junninen, H., Adamov, A., Almeida, J., Amorim, A., Bianchi, F., Breitenlechner, M., Dommen, J., Donahue, N. M., Duplissy, J., Ehrhart, S., Flagan, R. C., Franchin, A., Hakala, J., Hansel, A., Heinritzi, M., Hutterli, M., Kangasluoma, J., Kirkby, J., Laaksonen, A., Lehtipalo, K., Leiminger, M., Makhmutov, V., Mathot, S., Onnela, A., Petäjä, T., Praplan, A. P., Riccobono, F., Rissanen, M. P., Rondo, L., Schobesberger, S., Seinfeld, J. H., Steiner, G., Tomé, A., Tröstl, J., Winkler, P. M., Williamson, C., Wimmer, D., Ye, P., Baltensperger, U., Carslaw, K. S., Kulmala, M., Worsnop, D. R., and Curtius, J.: Neutral molecular cluster formation of sulfuric acid–dimethylamine observed in real time under atmospheric conditions, *Proceedings of the National Academy of Sciences*, 111, 15019-15024, 10.1073/pnas.1404853111, 2014.
- 735 Laitinen, T., Hartonen, K., Kulmala, M., and Riekkola, M. L.: Aerosol time-of-flight mass spectrometer for measuring ultrafine aerosol particles, *Boreal Environ Res*, 14, 539-549, 2009.
- 740 Lee, B. H., Lopez-Hilfiker, F. D., Mohr, C., Kurtén, T., Worsnop, D. R., and Thornton, J. A.: An Iodide-Adduct High-Resolution Time-of-Flight Chemical-Ionization Mass Spectrometer: Application to Atmospheric Inorganic and Organic Compounds, *Environmental Science & Technology*, 48, 6309-6317, 10.1021/es500362a, 2014.

- Lee, C. P., Riva, M., Wang, D., Tomaz, S., Li, D., Perrier, S., Slowik, J. G., Bourgain, F., Schmale, J., Prevot, A. S. H., Baltensperger, U., George, C., and El Haddad, I.: Online Aerosol Chemical Characterization by Extractive Electrospray Ionization–Ultrahigh-Resolution Mass Spectrometry (EESI-Orbitrap), *Environmental Science & Technology*, 54, 3871-3880, 10.1021/acs.est.9b07090, 2020.
- 745 Lee, C. P., Surdu, M., Bell, D. M., Dommen, J., Xiao, M., Zhou, X., Baccharini, A., Giannoukos, S., Wehrle, G., Schneider, P. A., Prevot, A. S. H., Slowik, J. G., Lamkaddam, H., Wang, D., Baltensperger, U., and El Haddad, I.: High-Frequency Gaseous and Particulate Chemical Characterization using Extractive Electrospray Ionization Mass Spectrometry (Dual-Phase-EESI-TOF), *Atmos. Meas. Tech. Discuss.*, 2021, 1-21, 10.5194/amt-2021-325, 2021a.
- 750 Lee, C. P., Surdu, M., Bell, D. M., Lamkaddam, H., Wang, M., Ataei, F., Hofbauer, V., Lopez, B., Donahue, N. M., Dommen, J., Prevot, A. S. H., Slowik, J. G., Wang, D., Baltensperger, U., and El Haddad, I.: Effects of aerosol size and coating thickness on the molecular detection using extractive electrospray ionization, *Atmos. Meas. Tech.*, 14, 5913-5923, 10.5194/amt-14-5913-2021, 2021b.
- 755 Lee, C. P., Surdu, M., Bell, D. M., Dommen, J., Xiao, M., Zhou, X., Baccharini, A., Giannoukos, S., Wehrle, G., Schneider, P. A., Prevot, A. S. H., Slowik, J. G., Lamkaddam, H., Wang, D., Baltensperger, U., and El Haddad, I.: High-frequency gaseous and particulate chemical characterization using extractive electrospray ionization mass spectrometry (Dual-Phase-EESI-TOF), *Atmos. Meas. Tech.*, 15, 3747-3760, 10.5194/amt-15-3747-2022, 2022.
- 760 Li, Z., Buchholz, A., Ylisimä, A., Barreira, L., Hao, L., Schobesberger, S., Yli-Juuti, T., and Virtanen, A.: Evolution of volatility and composition in sesquiterpene-mixed and  $\alpha$ -pinene secondary organic aerosol particles during isothermal evaporation, *Atmos. Chem. Phys.*, 21, 18283-18302, 10.5194/acp-21-18283-2021, 2021.
- 765 Lopez-Hilfiker, F. D., Mohr, C., Ehn, M., Rubach, F., Kleist, E., Wildt, J., Mentel, T. F., Lutz, A., Hallquist, M., Worsnop, D., and Thomson, J. A.: A novel method for online analysis of gas and particle composition: description and evaluation of a Filter Inlet for Gases and AEROSols (FIGAERO), *Atmos. Meas. Tech.*, 7, 983-1001, 10.5194/amt-7-983-2014, 2014.
- 770 Lopez-Hilfiker, F. D., Mohr, C., Ehn, M., Rubach, F., Kleist, E., Wildt, J., Mentel, T. F., Carrasquillo, A. J., Daumit, K. E., Hunter, J. F., Kroll, J. H., Worsnop, D. R., and Thomson, J. A.: Phase partitioning and volatility of secondary organic aerosol components formed from  $\alpha$ -pinene ozonolysis and OH oxidation: the importance of accretion products and other low volatility compounds, *Atmos. Chem. Phys.*, 15, 7765-7776, 10.5194/acp-15-7765-2015, 2015.
- 775 Lopez-Hilfiker, F. D., Iyer, S., Mohr, C., Lee, B. H., D'Ambro, E. L., Kurtén, T., and Thomson, J. A.: Constraining the sensitivity of iodide adduct chemical ionization mass spectrometry to multifunctional organic molecules using the collision limit and thermodynamic stability of iodide ion adducts, *Atmospheric Measurement Techniques*, 2016.
- 780 Lopez-Hilfiker, F. D., Pospisilova, V., Huang, W., Kalberer, M., Mohr, C., Stefenelli, G., Thomson, J. A., Baltensperger, U., Prevot, A. S. H., and Slowik, J. G.: An extractive electrospray ionization time-of-flight mass spectrometer (EESI-TOF) for online measurement of atmospheric aerosol particles, *Atmos. Meas. Tech.*, 12, 4867-4886, 10.5194/amt-12-4867-2019, 2019.
- 785 Paatero, P., and Tapper, U.: Positive matrix factorization: A non-negative factor model with optimal utilization of error estimates of data values, *Environmetrics*, 5, 111-126, 1994.
- 790 Pankow, J. F., and Asher, W. E.: SIMPOL. 1: a simple group contribution method for predicting vapor pressures and enthalpies of vaporization of multifunctional organic compounds, *Atmospheric Chemistry and Physics*, 8, 2773-2796, 2008.
- 795 Phares, D. J., and Collier, S.: Direct Collection of Aerosols by Electrostatic Classification for Size-Resolved Chemical Analysis, *Aerosol Science and Technology*, 44, 173-181, 10.1080/02786820903482914, 2010.
- 800 Shen, J., Scholz, W., He, X.-C., Zhou, P., Marie, G., Wang, M., Marten, R., Surdu, M., Rörup, B., Baalbaki, R., Amorim, A., Ataei, F., Bell, D. M., Bertozzi, B., Brasseur, Z., Caudillo, L., Chen, D., Chu, B., Dada, L., Duplissy, J., Finkenzeller, H., Granzin, M., Guida, R., Heinritzi, M., Hofbauer, V., Iyer, S., Kempainen, D., Kong, W., Krechmer, J. E., Kürten, A., Lamkaddam, H., Lee, C. P., Lopez, B., Mahfouz, N. G. A., Manninen, H. E., Massabò, D., Mauldin, R. L., Mentler, B., Müller, T., Pfeifer, J., Philippov, M., Piedehierro, A. A., Roldin, P., Schobesberger, S., Simon, M., Stolzenburg, D., Tham, Y. J., Tomé, A., Umo, N. S., Wang, D., Wang, Y., Weber, S. K., Welti, A., Wollesen de Jonge, R., Wu, Y., Zauner-Wieczorek, M., Züst, F., Baltensperger, U., Curtius, J., Flagan, R. C., Hansel, A., Möhler, O., Petäjä, T., Volkamer, R., Kulmala, M., Lehtipalo, K., Rissanen, M., Kirkby, J., El-Haddad, I., Bianchi, F., Sipilä, M., Donahue, N. M., and Worsnop, D. R.: High Gas-Phase Methanesulfonic Acid Production in the OH-Initiated Oxidation of Dimethyl Sulfide at Low Temperatures, *Environmental Science & Technology*, 56, 13931-13944, 10.1021/acs.est.2c05154, 2022.
- 805 Simon, M., Dada, L., Heinritzi, M., Scholz, W., Stolzenburg, D., Fischer, L., Wagner, A. C., Kürten, A., Rörup, B., He, X. C., Almeida, J., Baalbaki, R., Baccharini, A., Bauer, P. S., Beck, L., Bergen, A., Bianchi, F., Bräkling, S., Brilke, S., Caudillo, L., Chen, D., Chu, B., Dias, A., Draper, D. C., Duplissy, J., El-Haddad, I., Finkenzeller, H., Frege, C., Gonzalez-Carracedo, L., Gordon, H., Granzin, M., Hakala, J., Hofbauer, V., Hoyle, C. R., Kim, C., Kong, W., Lamkaddam, H., Lee, C. P., Lehtipalo, K., Leiminger, M., Mai, H., Manninen, H. E., Marie, G., Marten, R., Mentler, B., Molteni, U., Nichman, L., Nie, W., Ojdanic, A., Onnela, A., Partoll, E., Petäjä, T., Pfeifer, J., Philippov, M., Quéléver, L. L. J., Ranjithkumar, A., Rissanen, M. P., Schallhart, S., Schobesberger, S., Schuchmann, S., Shen, J., Sipilä, M., Steiner, G., Stozhkov, Y., Tauber, C., Tham, Y. J., Tomé, A. R., Vazquez-Pufleau, M., Vogel, A. L., Wagner, R., Wang, M., Wang, D. S., Wang, Y., Weber, S. K., Wu, Y., Xiao, M., Yan, C., Ye, P., Ye, Q., Zauner-Wieczorek, M., Zhou, X., Baltensperger, U., Dommen, J., Flagan, R. C., Hansel, A., Kulmala, M., Volkamer, R., Winkler, P. M., Worsnop, D. R., Donahue, N. M., Kirkby, J., and Curtius, J.: Molecular understanding of new-particle formation from  $\alpha$ -pinene between  $-50$  and  $+25$  °C, *Atmos. Chem. Phys.*, 20, 9183-9207, 10.5194/acp-20-9183-2020, 2020.
- 810

- 815 Stark, H., Yataveli, R. L., Thompson, S. L., Kang, H., Krechmer, J. E., Kimmel, J. R., Palm, B. B., Hu, W., Hayes, P. L., and Day, D. A.: Impact of thermal decomposition on thermal desorption instruments: advantage of thermogram analysis for quantifying volatility distributions of organic species, *Environmental science & technology*, 51, 8491-8500, 2017.
- 820 Stolzenburg, D., Fischer, L., Vogel, A. L., Heinritzi, M., Schervish, M., Simon, M., Wagner, A. C., Dada, L., Ahonen, L. R., Amorim, A., Baccarini, A., Bauer, P. S., Baumgartner, B., Bergen, A., Bianchi, F., Breitenlechner, M., Brilke, S., Buenrostro Mazon, S., Chen, D., Dias, A., Draper, D. C., Duplissy, J., El Haddad, I., Finkenzeller, H., Frege, C., Fuchs, C., Garmash, O., Gordon, H., He, X., Helm, J., Hofbauer, V., Hoyle, C. R., Kim, C., Kirkby, J., Kontkanen, J., Kürten, A., Lampilahti, J., Lawler, M., Lehtipalo, K., Leiminger, M., Mai, H., Mathot, S., Mentler, B., Molteni, U., Nie, W., Nieminen, T., Nowak, J. B., Ojdanic, A., Onnela, A., Passananti, M., Petäjä, T., Quéléver, L. L. J., Rissanen, M. P., Samela, N., Schallhart, S., Tauber, C., Tomé, A., Wagner, R., Wang, M., Weitz, L., Wimmer, D., Xiao, M., Yan, C., Ye, P., Zha, Q., Baltensperger, U., Curtius, J., Dommen, J., Flagan, R. C., Kulmala, M., Smith, J. N., Worsnop, D. R., Hansel, A., Donahue, N. M., and Winkler, P. M.: Rapid growth of organic aerosol nanoparticles over a wide tropospheric temperature range, *Proceedings of the National Academy of Sciences*, 115, 9122-9127, 10.1073/pnas.1807604115, 2018.
- 825 Subramanian, R., Khlystov, A. Y., Cabada, J. C., and Robinson, A. L.: Positive and Negative Artifacts in Particulate Organic Carbon Measurements with Denuded and Undenuded Sampler Configurations Special Issue of *Aerosol Science and Technology* on Findings from the Fine Particulate Matter Supersites Program, *Aerosol Science and Technology*, 38, 27-48, 10.1080/02786820390229354, 2004.
- 830 Surdu, M., Pospisilova, V., Xiao, M., Wang, M., Mentler, B., Simon, M., Stolzenburg, D., Hoyle, C. R., Bell, D. M., Lee, C. P., Lamkaddam, H., Lopez-Hilfiker, F., Ahonen, L. R., Amorim, A., Baccarini, A., Chen, D., Dada, L., Duplissy, J., Finkenzeller, H., He, X.-C., Hofbauer, V., Kim, C., Kürten, A., Kvashnin, A., Lehtipalo, K., Makhmutov, V., Molteni, U., Nie, W., Onnela, A., Petäjä, T., Quéléver, L. L. J., Tauber, C., Tomé, A., Wagner, R., Yan, C., Prevot, A. S. H., Dommen, J., Donahue, N. M., Hansel, A., Curtius, J., Winkler, P. M., Kulmala, M., Volkamer, R., Flagan, R. C., Kirkby, J., Worsnop, D. R., Slowik, J. G., Wang, D. S., Baltensperger, U., and Haddad, I. e.: Molecular characterization of ultrafine particles using extractive electrospray time-of-flight mass spectrometry, *Environmental Science: Atmospheres*, 1, 434-448, 10.1039/D1EA00050K, 2021.
- 835 Turpin, B. J., Huntzicker, J. J., and Hering, S. V.: Investigation of organic aerosol sampling artifacts in the Los Angeles basin, *Atmos. Chem. Phys.*, 28, 3061-3071, 10.1016/1352-2310(94)00133-6, 1994.
- 840 Ungeheuer, F., van Pinxteren, D., and Vogel, A. L.: Identification and source attribution of organic compounds in ultrafine particles near Frankfurt International Airport, *Atmos. Chem. Phys.*, 21, 3763-3775, 10.5194/acp-21-3763-2021, 2021.
- 845 Voisin, D., Smith, J. N., Sakurai, H., McMurry, P. H., and Eisele, F. L.: Thermal Desorption Chemical Ionization Mass Spectrometer for Ultrafine Particle Chemical Composition, *Aerosol Science and Technology*, 37, 471-475, 10.1080/02786820300959, 2003.
- 850 Wagner, A. C., Bergen, A., Brilke, S., Fuchs, C., Ernst, M., Hoker, J., Heinritzi, M., Simon, M., Böhner, B., and Curtius, J.: Size-resolved online chemical analysis of nanoaerosol particles: a thermal desorption differential mobility analyzer coupled to a chemical ionization time-of-flight mass spectrometer, *Atmospheric Measurement Techniques*, 11, 5489-5506, 2018.
- 855 Wang, D. S., and Hildebrandt Ruiz, L.: Chlorine-initiated oxidation of n-alkanes under high-NO<sub>x</sub> conditions: insights into secondary organic aerosol composition and volatility using a FIGAERO-CIMS, *Atmos. Chem. Phys.*, 18, 15535-15553, 10.5194/acp-18-15535-2018, 2018.
- 860 Wang, M., Chen, D., Xiao, M., Ye, Q., Stolzenburg, D., Hofbauer, V., Ye, P., Vogel, A. L., Mauldin, R. L., Amorim, A., Baccarini, A., Baumgartner, B., Brilke, S., Dada, L., Dias, A., Duplissy, J., Finkenzeller, H., Garmash, O., He, X.-C., Hoyle, C. R., Kim, C., Kvashnin, A., Lehtipalo, K., Fischer, L., Molteni, U., Petäjä, T., Pospisilova, V., Quéléver, L. L. J., Rissanen, M., Simon, M., Tauber, C., Tomé, A., Wagner, A. C., Weitz, L., Volkamer, R., Winkler, P. M., Kirkby, J., Worsnop, D. R., Kulmala, M., Baltensperger, U., Dommen, J., El-Haddad, I., and Donahue, N. M.: Photo-oxidation of Aromatic Hydrocarbons Produces Low-Volatility Organic Compounds, *Environmental Science & Technology*, 54, 7911-7921, 10.1021/acs.est.0c02100, 2020.
- 865 Wang, S., Zordan, C. A., and Johnston, M. V.: Chemical Characterization of Individual, Airborne Sub-10-nm Particles and Molecules, *Analytical Chemistry*, 78, 1750-1754, 10.1021/ac052243l, 2006.
- 870 Yang, L. H., Takeuchi, M., Chen, Y., and Ng, N. L.: Characterization of thermal decomposition of oxygenated organic compounds in FIGAERO-CIMS, *Aerosol Science and Technology*, 55, 1321-1342, 10.1080/02786826.2021.1945529, 2021.
- 875 Ye, Q., Wang, M., Hofbauer, V., Stolzenburg, D., Chen, D., Schervish, M., Vogel, A. L., Mauldin, R. L., Baalbaki, R., Brilke, S., Dada, L., Dias, A., Duplissy, J., El Haddad, I., Finkenzeller, H., Fischer, L., He, X., Kim, C., Kürten, A., Lamkaddam, H., Lee, C. P., Lehtipalo, K., Leiminger, M., Manninen, H. E., Marten, R., Mentler, B., Partoll, E., Petäjä, T., Rissanen, M. P., Schobesberger, S., Schuchmann, S., Simon, M., Tham, Y. J., Vazquez-Pufleau, M., Wagner, A. C., Wang, Y., Wu, Y., Xiao, M., Baltensperger, U., Curtius, J., Flagan, R., Kirkby, J., Kulmala, M., Volkamer, R., Winkler, P. M., Worsnop, D. R., and Donahue, N. M.: Molecular Composition and Volatility of Nucleated Particles from  $\alpha$ -Pinene Oxidation between -50 °C and +25 °C, *Environmental Science & Technology*, 10.1021/acs.est.9b03265, 2019.



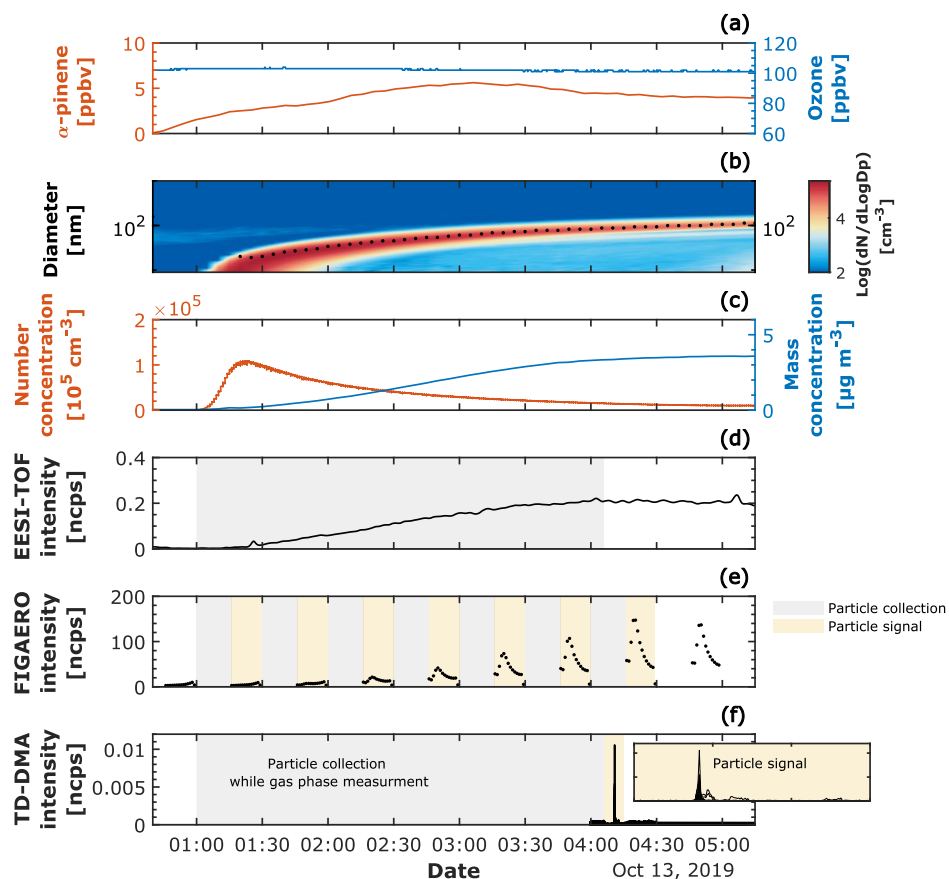

**Figure 1. Experimental overview of a representative biogenic new particle formation experiment ( $\alpha$ -pinene ozonolysis at  $-30\text{ }^{\circ}\text{C}$  and  $20\text{ }\%$  RH). (a) Mixing ratio in ppbv for the precursor gases,  $\alpha$ -pinene and ozone. (b) Particle size distribution measured by the SMPS; the color scale represents the  $\log_{10}$  of the normalized particle concentration per cubic centimeter ( $\text{cm}^{-3}$ ). The median mass diameter (MMD) is shown with a black dashed line. (c) Particle number concentration in  $\text{cm}^{-3}$  measured by the CPC with a cut-off diameter of  $2.5\text{ nm}$  and mass concentration in  $\mu\text{g m}^{-3}$  (obtained by integrating the normalized mass concentration from the SMPS). (d) Particle-phase signal measured continuously by the EESI-TOF, the gray shaded area refers to the period where the EESI-TOF was averaged for the intercomparison with TD-DMA and FIGAERO. (e) Particle-phase measured by FIGAERO, the gray shaded areas refer to the particle collection period and the yellow shaded areas to the desorption period. FIGAERO measured in a semicontinuous mode, namely 15-minute particle collections followed by 15-minute desorption periods. In order to intercompare with EESI-TOF and TD-DMA, FIGAERO signals were integrated during the period where the TD-DMA collected particles ( $\sim 3$  hours), seven FIGAERO particle samples were integrated during the 3 hours comparison period. (f) Particle-phase measured by the TD-DMA; The TD-DMA collection period was approximately 3 hours while the desorption period lasted around 1 minute followed by a second heating for estimating the background.**

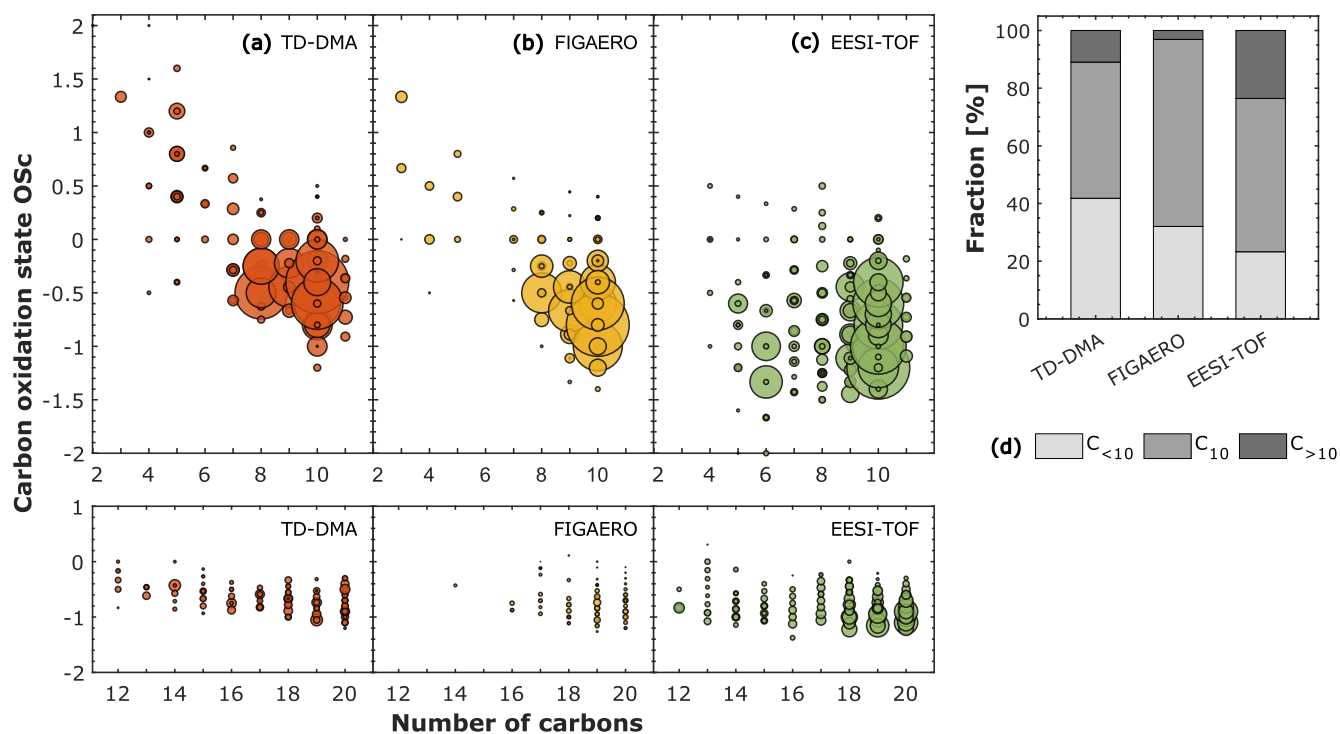

910 **Figure 24.** Carbon oxidation state OSc against the number of carbon atoms for  $\alpha$ -pinene oxidation products in the particle-phase  
 at  $-30\text{ }^{\circ}\text{C}$  and 20 % RH measured by three different techniques. (a) TD-DMA: Thermal Desorption-Differential Mobility Analyzer  
 coupled to a  $\text{NO}_3^-$  chemical ionization-atmospheric-pressure-interface-time-of-flight mass spectrometer. (b) FIGAERO: Filter  
 Inlet for Gases and AEROsols coupled to an I<sup>-</sup> high-resolution time-of-flight chemical-ionization mass spectrometer, and (c) EESI-  
 915 TOF: Extractive Electrospray  $\text{Na}^+$  Ionization time-of-flight mass spectrometer. The level of  $\alpha$ -pinene was between 1 and 6 ppbv  
 while the ozone level was  $\sim 100$  ppbv. The carbon oxidation state is calculated as follows:  $\text{OSc} = 2 \times \text{O}:\text{C} - \text{H}:\text{C}$ . The marker sizes in  
 (a), (b), and (c) represent the intensities normalized by the total signal in each system. (d) Fraction of species in the particle-phase  
 containing less than 10 carbon atoms ( $C_{<10}$ ), 10 carbon atoms ( $C_{10}$ ), and more than 10 carbon atoms ( $C_{>10}$ ). The fraction was  
 calculated by normalizing the intensities by the total signal in each system.

920

925

930

935

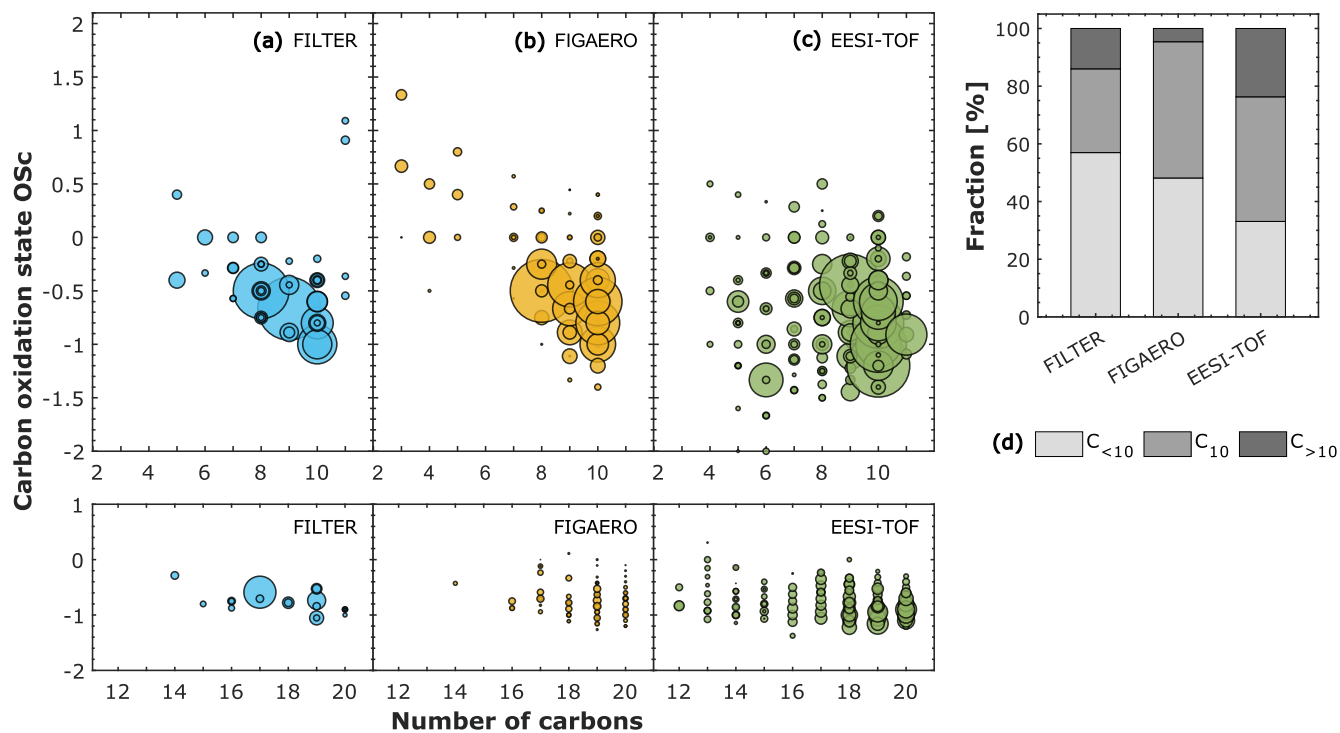

Figure 32. Carbon oxidation state OSc against the number of carbon atoms for  $\alpha$ -pinene oxidation products in the particle-phase at  $-10\text{ }^{\circ}\text{C}$  and  $80\text{ \% RH}$  measured by three different techniques. (a) FILTER: Offline analysis of filters using Ultra-high-performance liquid chromatography (UHPLC) and heated electrospray ionization (HESI) coupled to an Orbitrap high-resolution mass spectrometer (HRMS). (b) FIGAERO: Filter Inlet for Gases and AEROsols coupled to an I high-resolution time-of-flight chemical-ionization mass spectrometer, and (c) EESI-TOF: Extractive Electrospray  $\text{Na}^+$  Ionization time-of-flight mass spectrometer. The level of  $\alpha$ -pinene was between 1 and 3 ppbv while the ozone level was  $\sim 100$  ppbv. The carbon oxidation state is calculated as follows:  $\text{OSc} = 2 \cdot \text{O:C} - \text{H:C}$ . The symbol sizes in (a), (b), and (c) represent the intensities normalized by the total signal in each system. (d) Fraction of species in the particle-phase containing less than 10 carbon atoms ( $\text{C}_{<10}$ ), 10 carbon atoms ( $\text{C}_{10}$ ), and more than 10 carbon atoms ( $\text{C}_{>10}$ ). The fraction was calculated by normalizing the intensities by the total signal in each system.

940

945

950

955

960

965

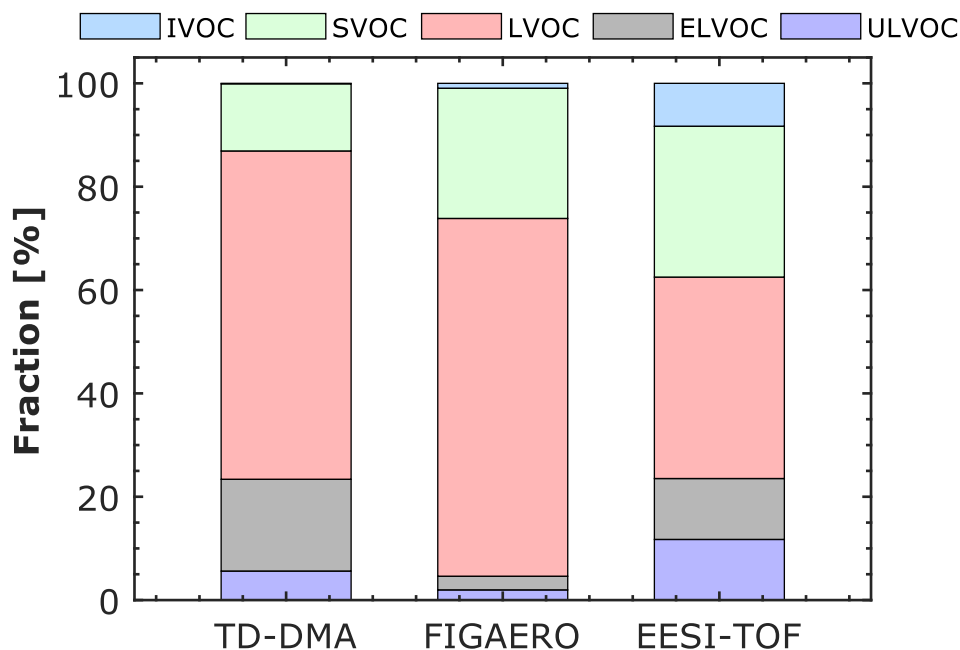

970 | **Figure 43.** Distribution of volatility classes for  $\alpha$ -pinene oxidation products in the particle-phase at  $-30\text{ }^{\circ}\text{C}$  and  $20\text{ \% RH}$  measured  
 | by three different techniques: (TD-DMA) Thermal Desorption-Differential Mobility Analyzer coupled to a  $\text{NO}_3^-$  chemical  
 | ionization-atmospheric-pressure-interface-time-of-flight mass spectrometer, (FIGAERO) Filter Inlet for Gases and AEROsols  
 | coupled to an  $\text{I}^-$  high-resolution time-of-flight chemical-ionization mass spectrometer, and (EESI-TOF) Extractive Electrospray  
 |  $\text{Na}^+$  Ionization time-of-flight mass spectrometer. The level of  $\alpha$ -pinene was between 1 and 6 ppbv while the ozone level was  $\sim 100$   
 | ppbv. The volatility classes (ULVOC, ELVOC, LVOC, SVOC, IVOC) were defined as in Donahue et al. (2012) and in Schervish  
 | and Donahue (2020).

975

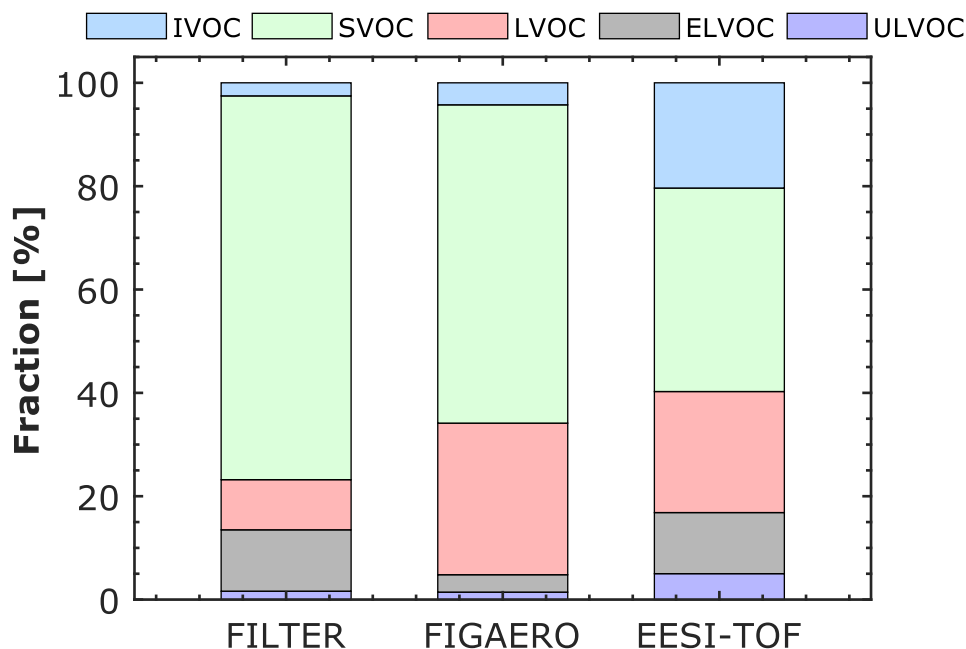

980 | **Figure 54.** Distribution of volatility classes for  $\alpha$ -pinene oxidation products in the particle-phase at  $-10\text{ }^{\circ}\text{C}$  and  $80\text{ \% RH}$  measured  
 | by three different techniques: (FILTER) Offline analysis of filters using Ultra-high-performance liquid chromatography and  
 | heated electrospray ionization coupled to an Orbitrap high-resolution mass spectrometer, (FIGAERO) Filter Inlet for Gases and  
 | AEROsols coupled to an  $\text{I}^-$  high-resolution time-of-flight chemical-ionization mass spectrometer, and (EESI-TOF) Extractive  
 | Electrospray  $\text{Na}^+$  Ionization time-of-flight mass spectrometer. The level of  $\alpha$ -pinene was between 1 and 3 ppbv while the ozone  
 | level was  $\sim 100$  ppbv. The volatility classes (ULVOC, ELVOC, LVOC, SVOC, IVOC) were defined as in Donahue et al. (2012) and  
 | in Schervish and Donahue (2020).

985

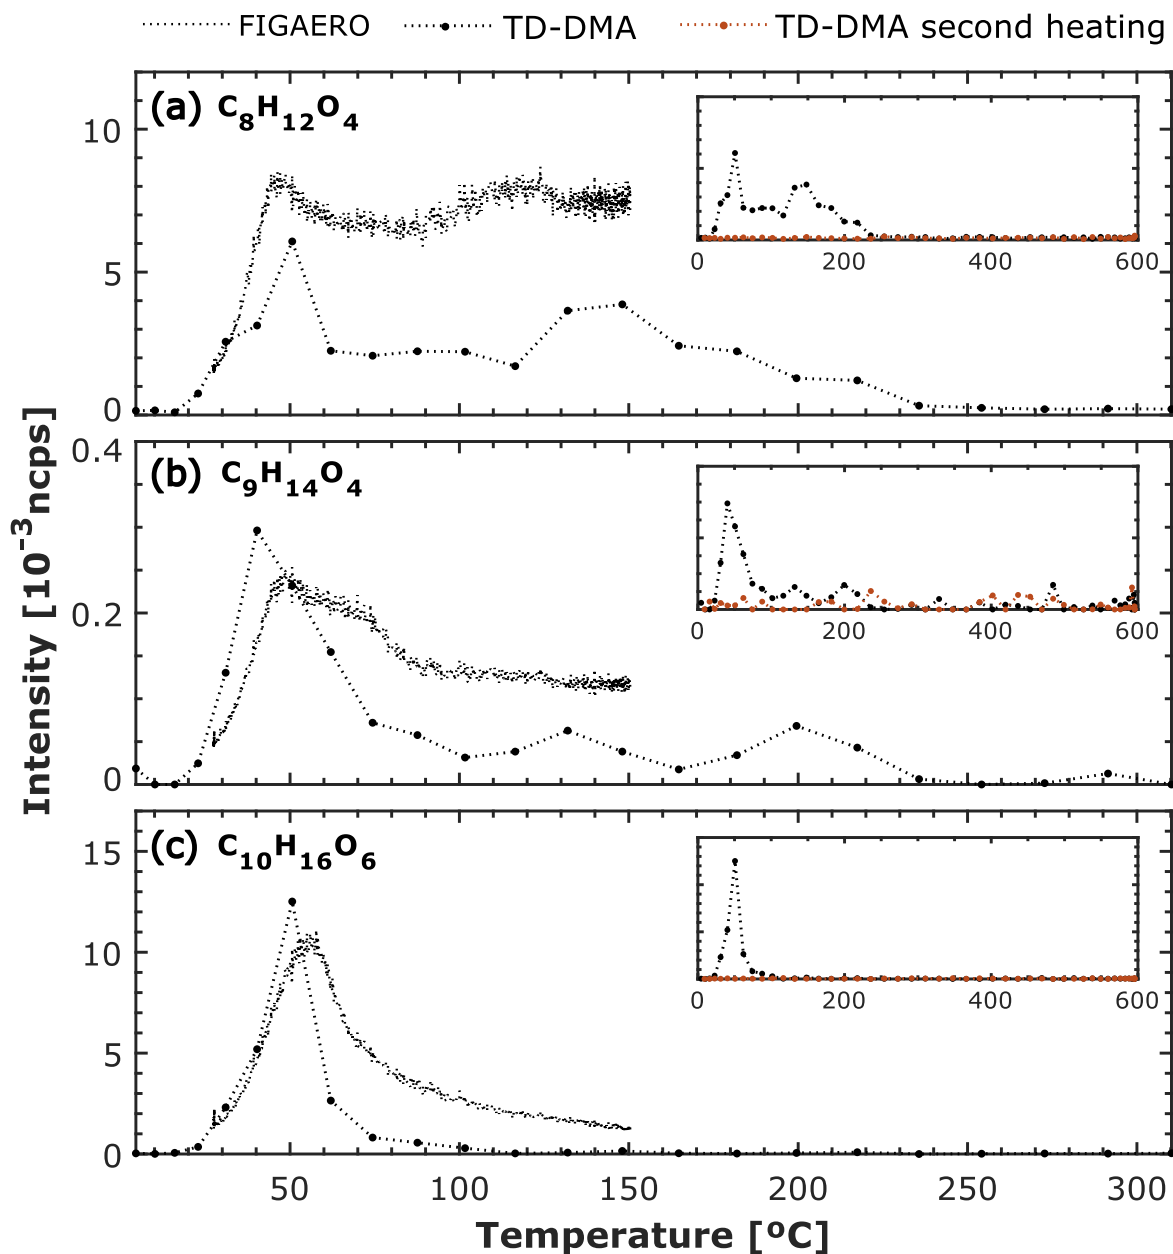

**Figure 6. FIGAERO and TD-DMA thermal desorption profiles for three different compounds detected in  $\alpha$ -pinene ozonolysis experiment at  $-30$   $^{\circ}$ C and 20 % RH. (a)  $C_8H_{12}O_4$ , (b)  $C_9H_{14}O_4$ , and, (c)  $C_{10}H_{16}O_6$ . FIGAERO and TD-DMA intensities are normalized by the reagent ions and expressed in normalized counts per second (ncps), FIGAERO signals have been divided by  $1E3$  in (a) and (c) and by  $5E4$  in (b). FIGAERO temperature is slowly ramped up to  $150$   $^{\circ}$ C in approximately 15 minutes while TD-DMA temperature increased up to  $600$   $^{\circ}$ C in approximately 1 minute. The TD-DMA temperature is an estimate based on the resistance of the filament. For the TD-DMA two heating profiles are needed for determining the particle signal and the background due to the heating of the inlet line.**

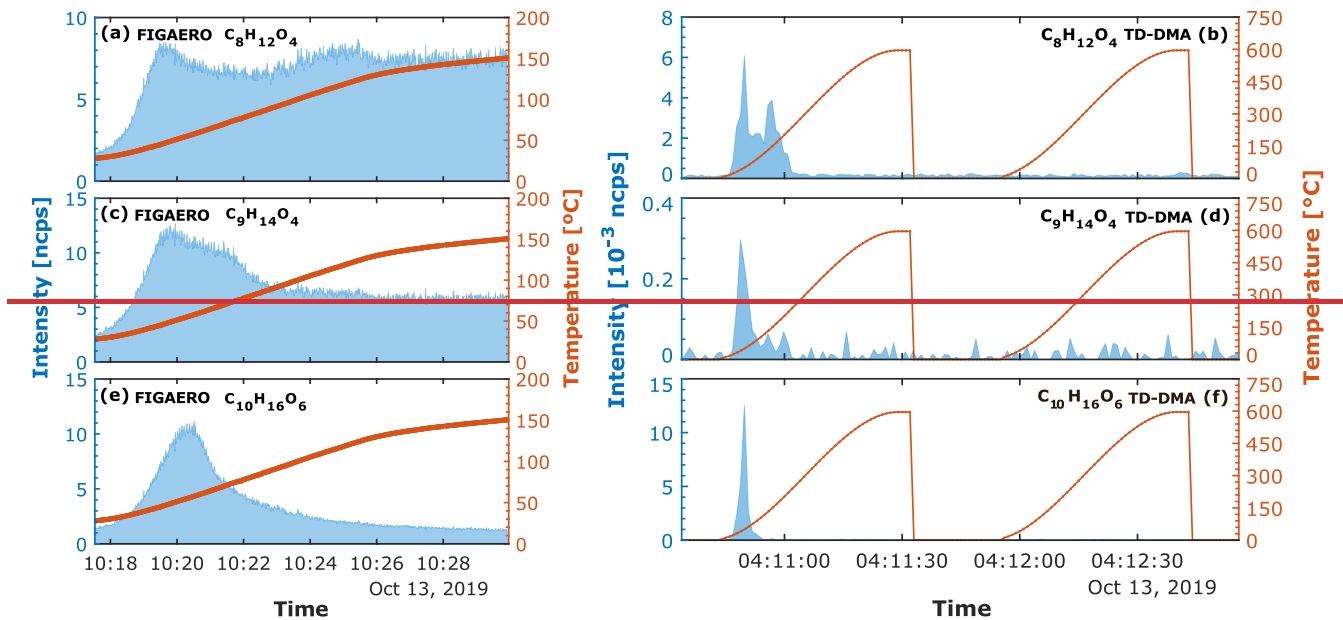

Figure 5. FIGAERO and TD-DMA thermal desorption profiles for three different compounds detected in  $\alpha$ -pinene ozonolysis experiment at  $-30$  °C and 20 % RH. (a), (c) and (e) show FIGAERO thermograms for  $C_8H_{12}O_4$ ,  $C_9H_{14}O_4$  and,  $C_{10}H_{16}O_6$  respectively. While (b), (d) and (f) present TD-DMA thermograms for  $C_8H_{12}O_4$ ,  $C_9H_{14}O_4$  and,  $C_{10}H_{16}O_6$ , respectively. FIGAERO and TD-DMA intensities are normalized by the reagent ions and expressed in normalized counts per second (ncps). Both FIGAERO and TD-DMA heating profiles are plotted as a function of temperature. The TD-DMA temperature is an estimate based on the resistance of the filament. For the TD-DMA two heating profiles are needed for determining the particle signal and the background due to the heating of the inlet line.

995

1000

1005

1010

1015

1020

1025



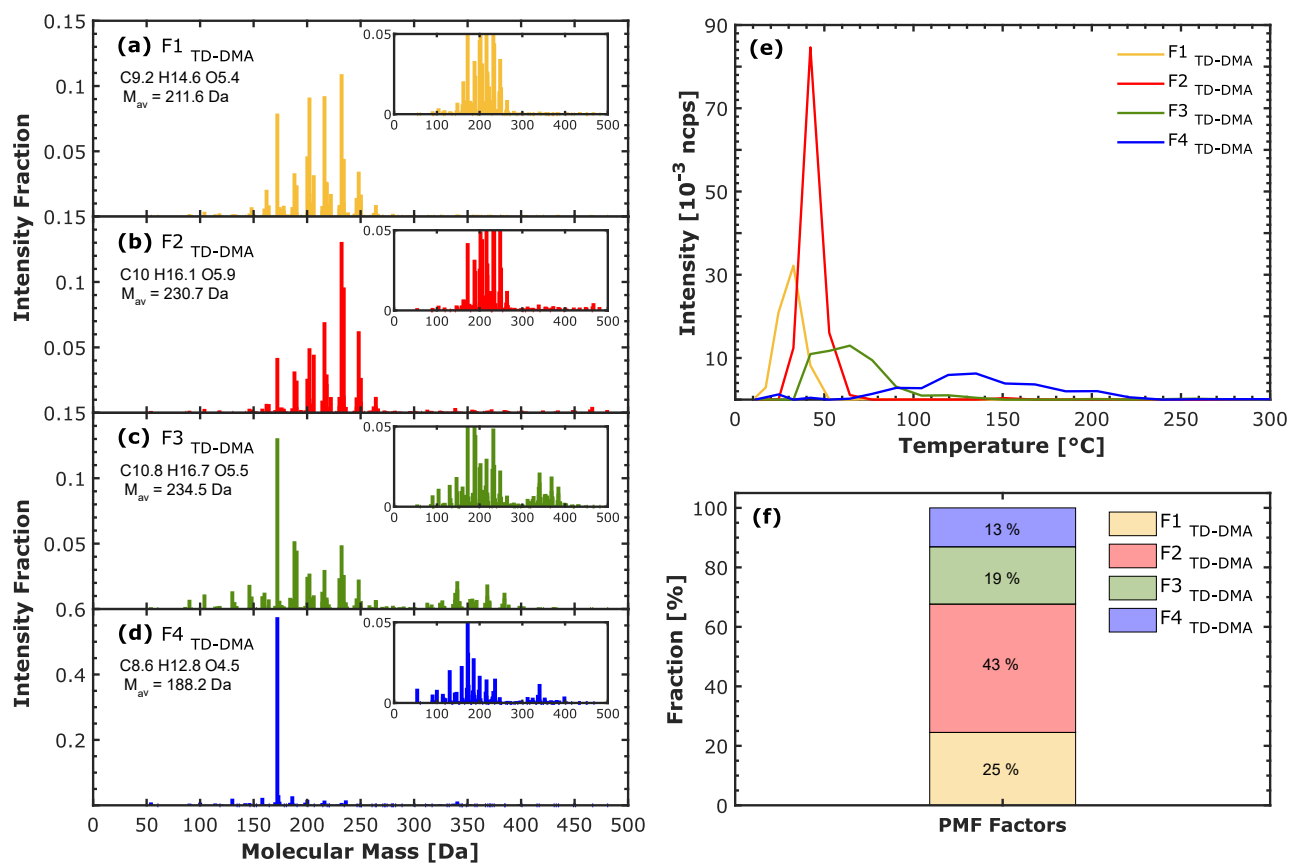

Figure 76. PMF suggested solution on the particle-phase detected by the TD-DMA in  $\alpha$ -pinene ozonolysis experiment at  $-30$  °C and 20 % RH. (a), (b), (c) and, (d) Factors mass spectra, (e) Factors thermograms and, (f) Factors fraction. Each factor mass spectrum is normalized and colored according to the order of appearance in the thermogram: F1<sub>TD-DMA</sub> (yellow), F2<sub>TD-DMA</sub> (red), F3<sub>TD-DMA</sub> (green), and F4<sub>TD-DMA</sub> (blue). The thermogram (e) is expressed as a function of the temperature, which is an estimation based on the filament resistance. The particle-phase signal has been background corrected.

1030

1035

1040

1045

1050

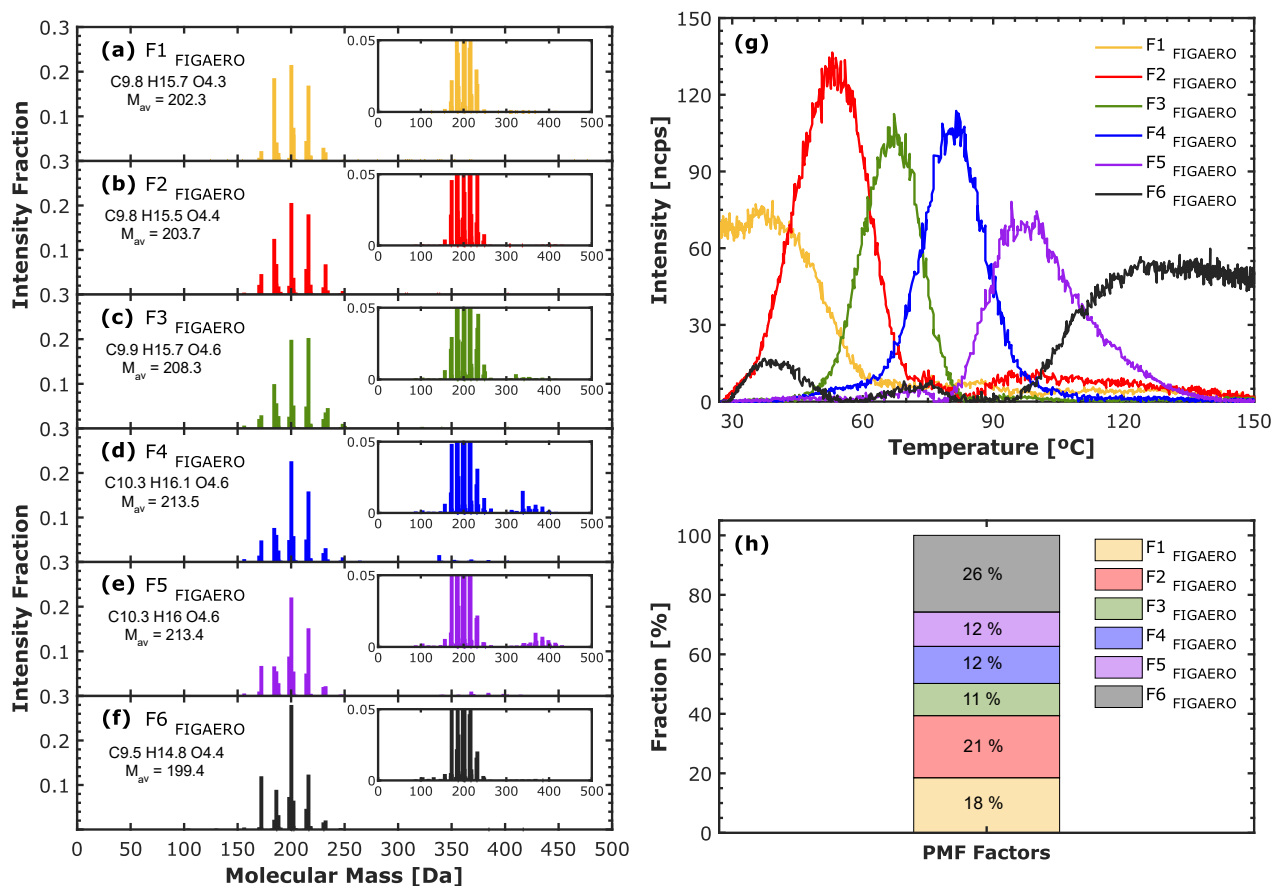

Figure 87. PMF suggested solution on the particle-phase detected by FIGAERO in  $\alpha$ -pinene ozonolysis experiment at -30 °C and 20 % RH. (a), (b), (c), (d), (e) and, (f) Factors mass spectra, (g) Factors thermograms and, (h) Factors fraction. Each factor mass spectrum is normalized and colored according to the order of appearance in the thermogram: F1 FIGAERO (yellow), F2 FIGAERO (red), F3 FIGAERO (green), F4 FIGAERO (blue), F5 FIGAERO (purple) and, F6 FIGAERO (black). The thermogram is expressed as a function of the temperature which causes the desorption. The particle-phase signal has been background corrected.

1060

1065

1070

1075

**Table 1.** Instruments for measuring particle-phase chemical composition used in the CLOUD chamber experiments.

|      | <b>TD-DMA + NO<sub>3</sub><sup>-</sup><br/>CI-API-TOF</b> | <b>FIGAERO + I<sup>-</sup><br/>HRTof-CIMS</b>                                  | <b>Na<sup>+</sup> EESI-TOF</b>                    | <b>FILTER<br/>UHPLC/HESI/HRMS<br/>method</b> |                                                                                   |
|------|-----------------------------------------------------------|--------------------------------------------------------------------------------|---------------------------------------------------|----------------------------------------------|-----------------------------------------------------------------------------------|
| 1080 | <i>Continuous or discontinuous</i>                        | semicontinuous                                                                 | semicontinuous                                    | continuous                                   | discontinuous - offline                                                           |
|      | <i>Evaporation method</i>                                 | Thermal desorption                                                             | Thermal desorption                                | Extraction solvent - evaporation             | Electrospray solvent - evaporation                                                |
|      | <i>Phase measured</i>                                     | Gas and Particle <sup>b</sup>                                                  | Gas and Particle <sup>b</sup>                     | Gas and Particle <sup>b</sup>                | Particle                                                                          |
| 1085 | <i>Ionization technique</i>                               | Chemical ionization                                                            | Chemical ionization                               | Electrospray ionization                      | Electrospray ionization                                                           |
|      | <i>Reagent ion</i>                                        | (HNO <sub>3</sub> )NO <sub>3</sub> <sup>-</sup> , NO <sub>3</sub> <sup>-</sup> | I <sup>-</sup> , (H <sub>2</sub> O)I <sup>-</sup> | (NaI)Na <sup>+</sup> , Na <sup>+</sup>       | NA<br>negative mode                                                               |
|      | <i>Target substances</i>                                  | Highly oxygenated                                                              | Intermediate oxygenated                           | Intermediate oxygenated                      | At least O <sub>1</sub><br>Any chemical stable species and able to donate protons |
| 1090 | <i>Is there thermal fragmentation?</i>                    | Yes                                                                            | Yes                                               | No                                           | No                                                                                |
|      | <i>Size-resolved for this study?</i>                      | No <sup>a</sup>                                                                | No                                                | No                                           | No                                                                                |
|      | <i>Reference</i>                                          | Wagner et al., 2018                                                            | Lopez-Hilfiker et al., 2015                       | Lopez-Hilfiker et al., 2019                  | Ungeheuer et al., 2020                                                            |

1095 <sup>a</sup> TD-DMA can measure both size-resolved and non-size-resolved. For this work it was chosen the non-size-resolved in order to maximize the mass collected and to intercompare with the particle-phase instruments, <sup>b</sup> in this work, only the particle-phase measurements are reported, <sup>c</sup> gas-and particle-phase can be measured by using the dual-EESI-TOF configuration.

1100

1105

1110

1115

1120

**Table 2.** Sample size conditions during the experiments performed at -30 °C, -10 °C and -50 °C. For the purposes of this intercomparison study, the sampling times were aligned base on the TD-DMA and FILTER collection times.

| <u>Experiment</u> | <u>Instruments intercompared</u>    | <u>Collection time / Comparison period (TD-DMA or FILTER)</u> | <u>Particle number concentration average* CPC<sub>2.5</sub> [cm<sup>-3</sup>]</u> | <u>Mass concentration average* SMPS [µg cm<sup>-3</sup>]</u> | <u>Median mass diameter (MMD) average*, max** SMPS [nm]</u> |
|-------------------|-------------------------------------|---------------------------------------------------------------|-----------------------------------------------------------------------------------|--------------------------------------------------------------|-------------------------------------------------------------|
| <u>-30 °C</u>     | <u>TD-DMA, EESI-TOF and FIGAERO</u> | <u>~3 hours</u>                                               | <u>4.5e+04</u>                                                                    | <u>1.70</u>                                                  | <u>51, 82</u>                                               |
| <u>-10 °C</u>     | <u>FILTER, EESI-TOF and FIGAERO</u> | <u>~17 hours</u>                                              | <u>1.0e+04</u>                                                                    | <u>1.24</u>                                                  | <u>106, 147</u>                                             |
| <u>-50 °C</u>     | <u>TD-DMA, EESI-TOF and FIGAERO</u> | <u>~5 hours</u>                                               | <u>3.6e+04</u>                                                                    | <u>1.67</u>                                                  | <u>66, 106</u>                                              |

\*Average during the sample collection period. \*\*maximum value during the sample collection period

125

130

135

140

145

150

155 **Table 32.** Advantages and drawbacks of four different techniques for measuring the chemical composition of nanoparticles.

| Instrument                                            | Advantages                                                                                                                                                                                                                                   | Drawbacks                                                                                                                                                                                                                                                                                         |
|-------------------------------------------------------|----------------------------------------------------------------------------------------------------------------------------------------------------------------------------------------------------------------------------------------------|---------------------------------------------------------------------------------------------------------------------------------------------------------------------------------------------------------------------------------------------------------------------------------------------------|
| <b>TD-DMA + NO<sub>3</sub><sup>-</sup> CI-API-TOF</b> | <ul style="list-style-type: none"> <li>- Size-resolved particle collection</li> <li>- Gas-phase can be measured while particle collection, gas and particle intercomparison</li> <li>- Detection immediately after collection</li> </ul>     | <ul style="list-style-type: none"> <li>- Resolution might depend on the particle load (collection time ~3 and 54 hours)*</li> <li>- Thermal fragmentation is possible</li> </ul>                                                                                                                  |
| <b>FIGAERO + I HRTof-CIMS</b>                         | <ul style="list-style-type: none"> <li>- Gas-phase can be measure while particle collection, gas and particle intercomparison</li> <li>- Detection immediately after collection</li> <li>- Time resolution 30 min: semicontinuous</li> </ul> | <ul style="list-style-type: none"> <li>- Non-size-resolved particle collection</li> <li>- Resolution 30 min: semicontinuous</li> <li>- Thermal fragmentation is possible</li> </ul>                                                                                                               |
| <b>Na<sup>+</sup> EESI-TOF</b>                        | <ul style="list-style-type: none"> <li>- Continuous measurement, 10-seconds time resolution</li> <li>- Gas-phase can be measure using the dual configuration</li> </ul>                                                                      | <ul style="list-style-type: none"> <li>- Non-size-resolved particle collection</li> <li>- size-dependence sensitivity</li> </ul>                                                                                                                                                                  |
| <b>FILTER UHPLC-HESI-HRMS method</b>                  | <ul style="list-style-type: none"> <li>- Differentiates between clusters and molecules (pre-separation makes sure that the compounds are not fragments)</li> <li>- Identify isomers** using chromatography for separation</li> </ul>         | <ul style="list-style-type: none"> <li>- Non-size-resolved particle collection</li> <li>- Resolution might depend on the particle load (collection time ~178 hours)*</li> <li>- Detection not immediately after collection, first stored</li> <li>- Possible aging, sampling artifacts</li> </ul> |

\*Collection period for the experiments reported here for TD-DMA and FILTER. \*\*An assumption about the structure can be expressed by doing complementary experiments.

# An intercomparison study of four different techniques for measuring chemical composition of nanoparticles

## Supplementary Material

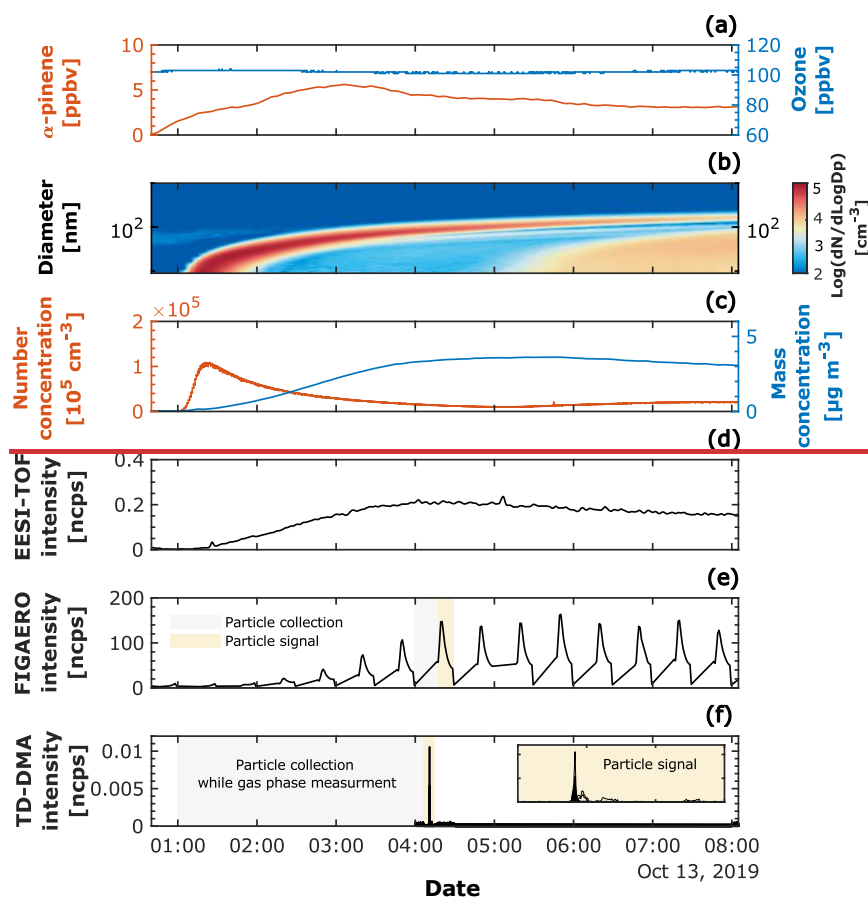

- 5 **Figure S1. Experimental overview of a representative biogenic new particle formation experiment ( $\alpha$ -pinene ozonolysis at  $-30$  °C and 20 % RH), (a) Mixing ratio in ppbv for the precursor gases,  $\alpha$ -pinene and ozone. (b) particle size distribution measured by the SMPS, the color scale represents the  $\log_{10}$  of the normalized particle concentration in cubic centimeters ( $\text{cm}^{-3}$ ). (c) Particle number concentration in  $\text{cm}^{-3}$  measured by the CPC with a cut-off diameter of 2.5 nm and mass concentration in  $\mu\text{g m}^{-3}$  (obtained by integrating the normalized mass concentration from the SMPS). (d) particle phase signal measured continuously by the EESI-TOF. Fifth and sixth panels: Particle phase measured by FIGAERO and TD-DMA respectively, the gray shaded areas refer to the particle collection period and the yellow shaded areas to the desorption period. FIGAERO measured in a semicontinuous mode in which 15-minute particle collections followed by 15-minute desorption periods were performed during the whole experiment. The TD-DMA collection period was approximately 4 hours while the desorption period lasted around 3 minutes.**
- 10



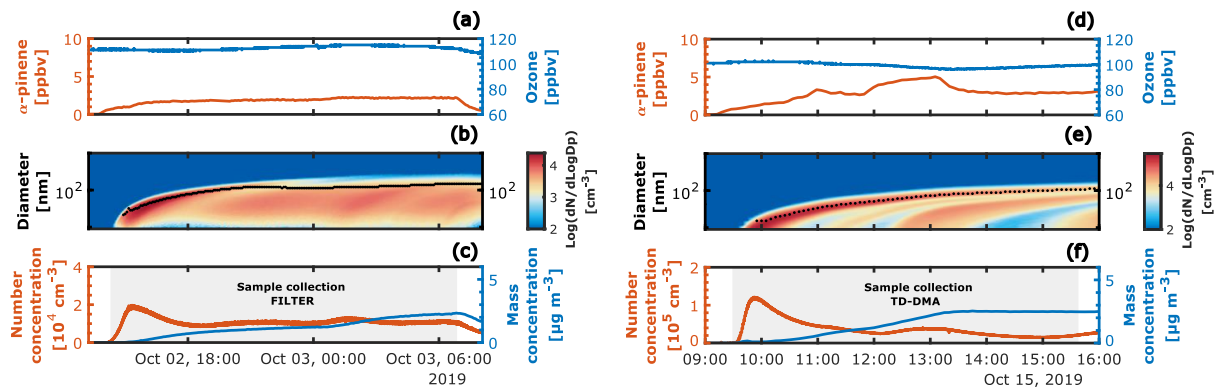

15 **Figure S1. Experimental overview of biogenic new particle formation experiments performed at -10 °C (left) and -50 °C (right).**  
 20 **Figures (a) and (d), show the mixing ratio in ppbv for the precursor gases,  $\alpha$ -pinene, and ozone at -10 °C and -50 °C, respectively.**  
**Figures (b) and (e) particle size distribution measured by the SMPS; the color scale represents the log<sub>10</sub> of the normalized particle**  
**concentration per cubic centimeter (cm<sup>-3</sup>). The median mass diameter (MMD) is shown with a black dashed line. Figures (c) and**  
**(f), particle number concentration in cm<sup>-3</sup> measured by the CPC with a cut-off diameter of 2.5 nm and mass concentration in  $\mu$ g**  
**m<sup>-3</sup> (obtained by integrating the normalized mass concentration from the SMPS), the gray shaded areas refer to the particle**  
**collection period used for the comparison with EESI-TOF and FIGAERO. The sample collection period for the intercomparison**  
**was determined by the FILTER at -10 °C and by the TD-DMA at -50 °C.**

25

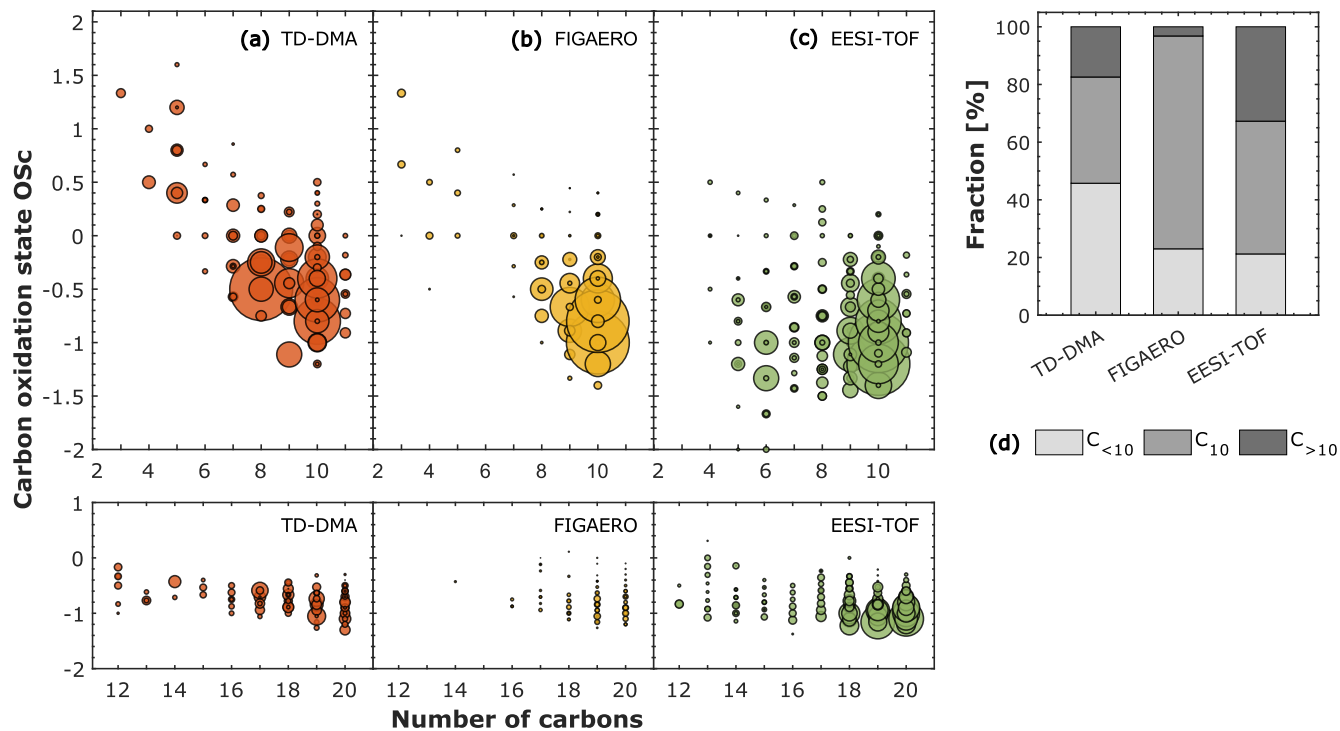

30  
 35  
 40  
 45

Figure S2. Carbon oxidation state OSc against the number of carbon atoms for  $\alpha$ -pinene oxidation products in the particle-phase at  $-50\text{ }^{\circ}\text{C}$  and 20 % RH measured by three different techniques. (a) TD-DMA: Thermal Desorption-Differential Mobility Analyzer coupled to a  $\text{NO}_3$  chemical ionization-atmospheric-pressure-interface-time-of-flight mass spectrometer. (b) FIGAERO: Filter Inlet for Gases and AEROsols coupled to an I<sup>-</sup> high-resolution time-of-flight chemical-ionization mass spectrometer, and (c) EESI-TOF: Extractive Electrospray  $\text{Na}^+$  Ionization time-of-flight mass spectrometer. The level of  $\alpha$ -pinene was between 1 and 6 ppbv while the ozone level was  $\sim$ 100 ppbv. The carbon oxidation state is calculated as follows:  $\text{OSc} = 2x\text{O}:\text{C} - \text{H}:\text{C}$ . The symbol sizes in (a), (b), and (c) represent the intensities normalized by the total signal in each system. (d) Fraction of species in the particle-phase containing less than 10 carbon atoms ( $C_{<10}$ ), 10 carbon atoms ( $C_{10}$ ), and more than 10 carbon atoms ( $C_{>10}$ ). The fraction was calculated by normalizing the intensities by the total signal in each system.

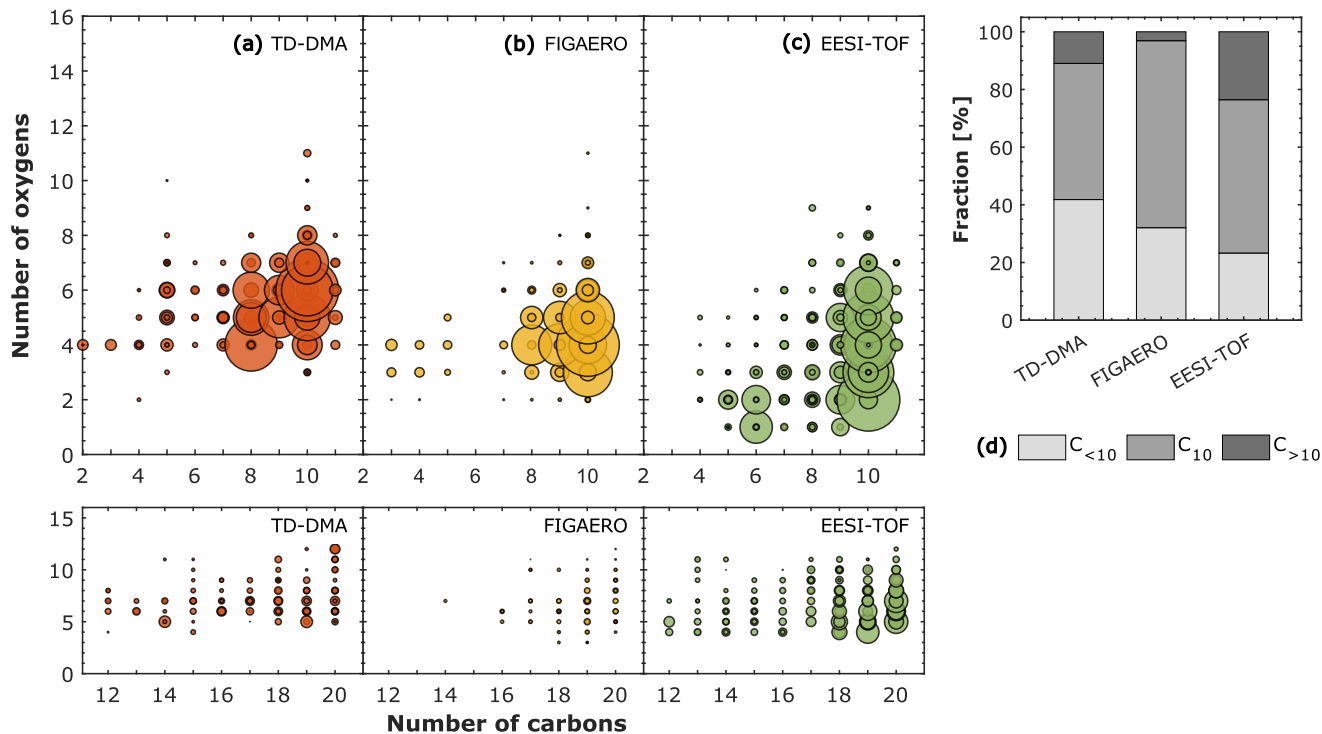

50 **Figure S3.** Number of oxygen atoms against the number of carbon atoms for  $\alpha$ -pinene oxidation products in the particle-phase at -  
 30 °C and 20 % RH measured by three different techniques. (a) TD-DMA: Thermal Desorption-Differential Mobility Analyzer  
 coupled to a  $\text{NO}_3^-$  chemical ionization-atmospheric-pressure-interface-time-of-flight mass spectrometer. (b) FIGAERO: Filter  
 Inlet for Gases and AEROsols coupled to an I<sup>-</sup> high-resolution time-of-flight chemical-ionization mass spectrometer, and (c) EESI-  
 TOF: Extractive Electrospray  $\text{Na}^+$  Ionization time-of-flight mass spectrometer. The level of  $\alpha$ -pinene was between 1 and 6 ppbv  
 while the ozone level was  $\sim$ 100 ppbv. The symbol sizes in (a), (b), and (c) represent the intensities normalized by the total signal in  
 55 each system. (d) Fraction of species in the particle-phase containing less than 10 carbon atoms ( $C_{<10}$ ), 10 carbon atoms ( $C_{10}$ ), and  
 more than 10 carbon atoms ( $C_{>10}$ ). The fraction was calculated by normalizing the intensities by the total signal in each system.

60

65

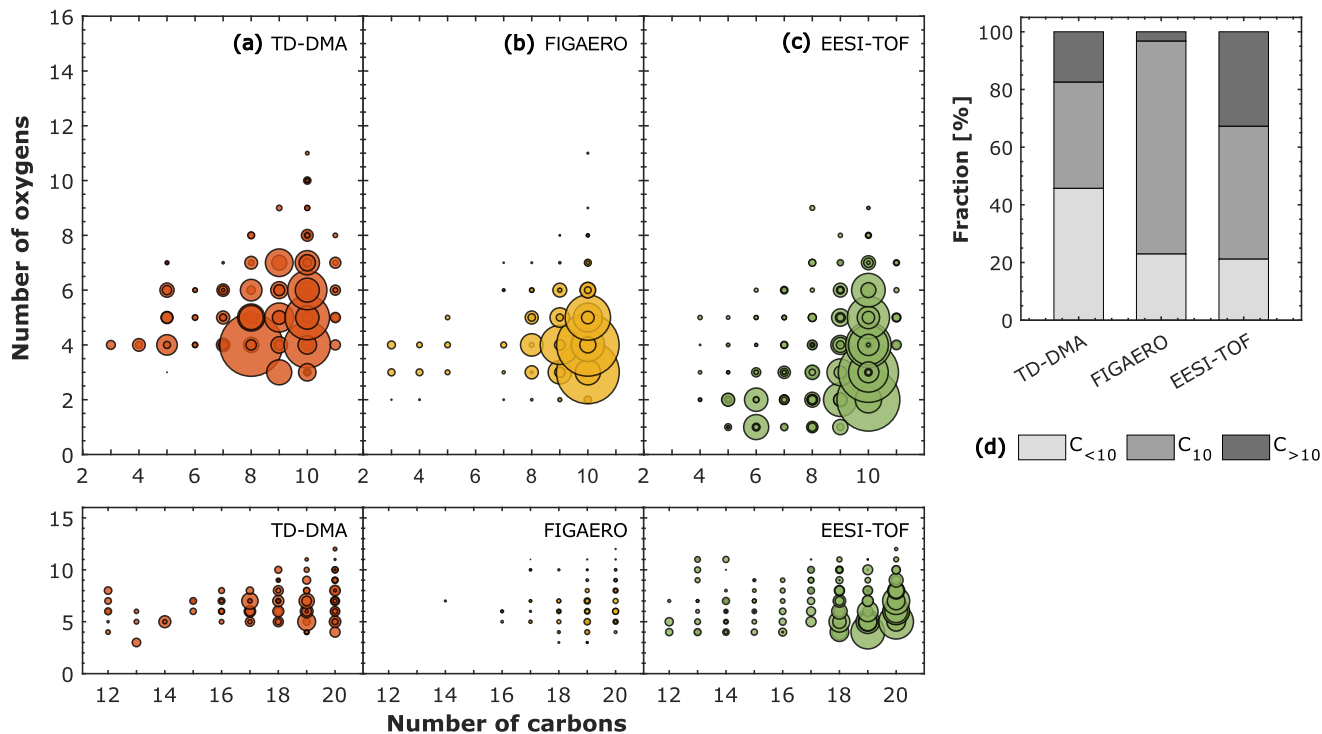

70 **Figure S4.** Number of oxygen atoms against the number of carbon atoms for  $\alpha$ -pinene oxidation products in the particle-phase at -  
 50 °C and 20 % RH measured by three different techniques. (a) TD-DMA: Thermal Desorption-Differential Mobility Analyzer  
 75 coupled to a  $\text{NO}_3^-$  chemical ionization-atmospheric-pressure-interface-time-of-flight mass spectrometer. (b) FIGAERO: Filter  
 Inlet for Gases and AEROsols coupled to an I<sup>-</sup> high-resolution time-of-flight chemical-ionization mass spectrometer, and (c) EESI-  
 TOF: Extractive Electrospray  $\text{Na}^+$  Ionization time-of-flight mass spectrometer. The level of  $\alpha$ -pinene was between 1 and 6 ppbv  
 while the ozone level was ~ 100 ppbv. The symbol sizes in (a), (b), and (c) represent the intensities normalized by the total signal in  
 each system. (d) Fraction of species in the particle-phase containing less than 10 carbon atoms ( $C_{<10}$ ), 10 carbon atoms ( $C_{10}$ ), and  
 more than 10 carbon atoms ( $C_{>10}$ ). The fraction was calculated by normalizing the intensities by the total signal in each system.

80

85

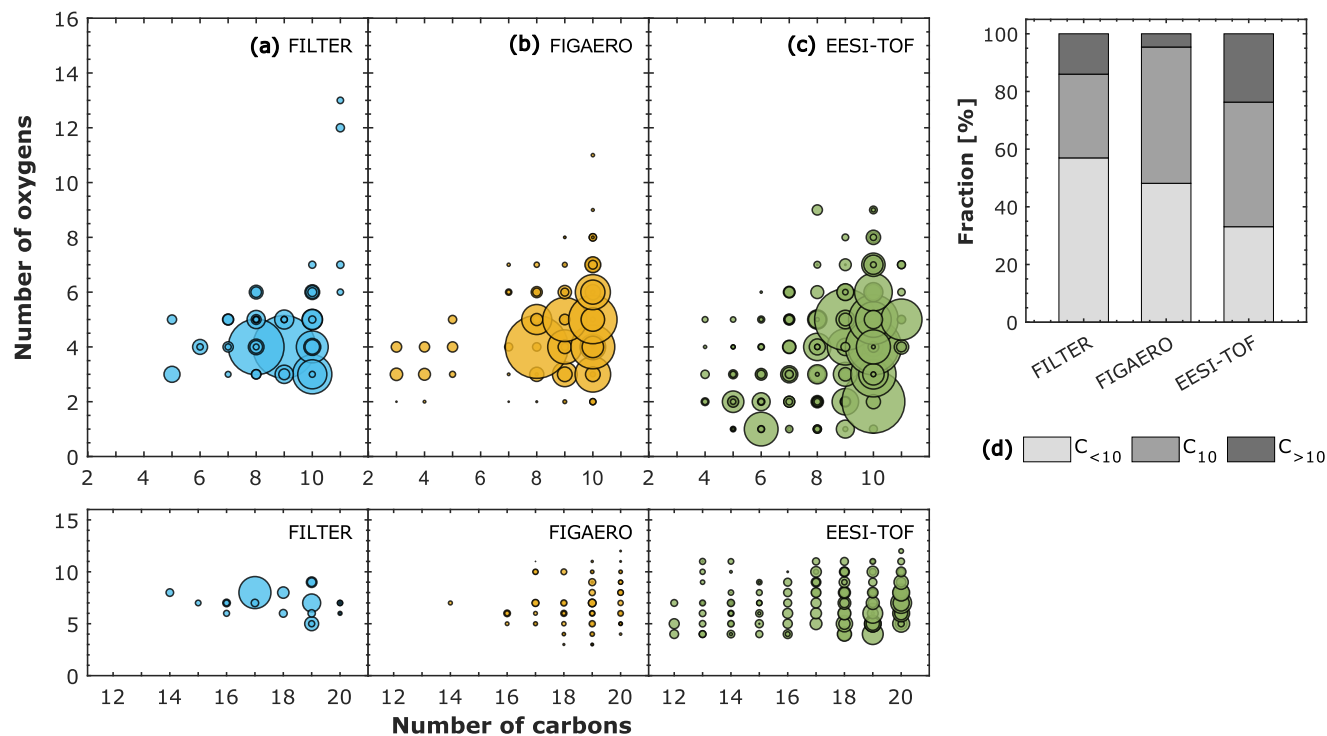

90

Figure S5. Number of oxygen atoms against the number of carbon atoms for  $\alpha$ -pinene oxidation products in the particle-phase at -10 °C and 80 % RH measured by three different techniques. (a) FILTER: Offline analysis of filters using Ultra-high-performance liquid chromatography (UHPLC) and heated electrospray ionization (HESI) coupled to an Orbitrap high-resolution mass spectrometer (HRMS). (b) FIGAERO: Filter Inlet for Gases and AEROsols coupled to an I high-resolution time-of-flight chemical-ionization mass spectrometer, and (c) EESI-TOF: Extractive Electrospray  $\text{Na}^+$  Ionization time-of-flight mass spectrometer. The level of  $\alpha$ -pinene was between 1 and 3 ppbv while the ozone level was  $\sim$ 100 ppbv. The symbol sizes in (a), (b), and (c) represent the intensities normalized by the total signal in each system. (d) Fraction of species in the particle-phase containing less than 10 carbon atoms ( $\text{C}_{<10}$ ), 10 carbon atoms ( $\text{C}_{10}$ ), and more than 10 carbon atoms ( $\text{C}_{>10}$ ). The fraction was calculated by normalizing the intensities by the total signal in each system.

100

105

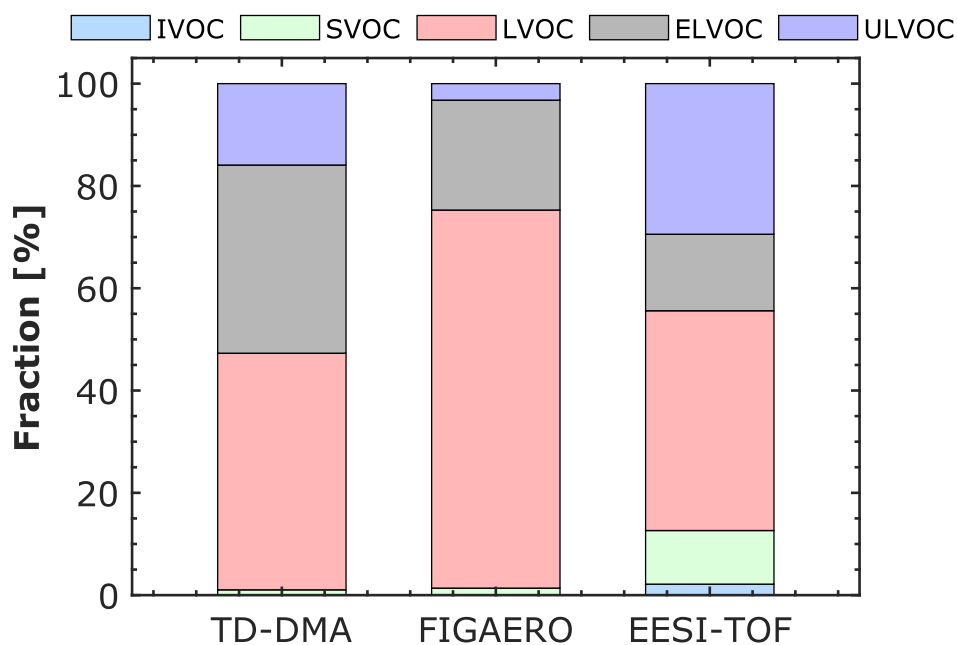

Figure S6. Fraction of volatility regimes for  $\alpha$ -pinene oxidation products in the particle-phase at  $-50\text{ }^{\circ}\text{C}$  and  $20\text{ }\%$  RH measured by three different techniques: (TD-DMA) Thermal Desorption-Differential Mobility Analyzer coupled to a  $\text{NO}_3^-$  chemical ionization-atmospheric-pressure-interface-time-of-flight mass spectrometer, (FIGAERO) Filter Inlet for Gases and AEROsols coupled to an  $\text{I}^-$  high-resolution time-of-flight chemical-ionization mass spectrometer, and (EESI-TOF) Extractive Electrospray  $\text{Na}^+$  Ionization time-of-flight mass spectrometer. The level of  $\alpha$ -pinene was between 1 and 6 ppbv while Ozone level was  $\sim 100$  ppbv. The volatility regimes (ULVOC, ELVOC, LVOC, SVOC, IVOC) were defined as in Donahue et al. (2012) and in Schervish and Donahue (2020).



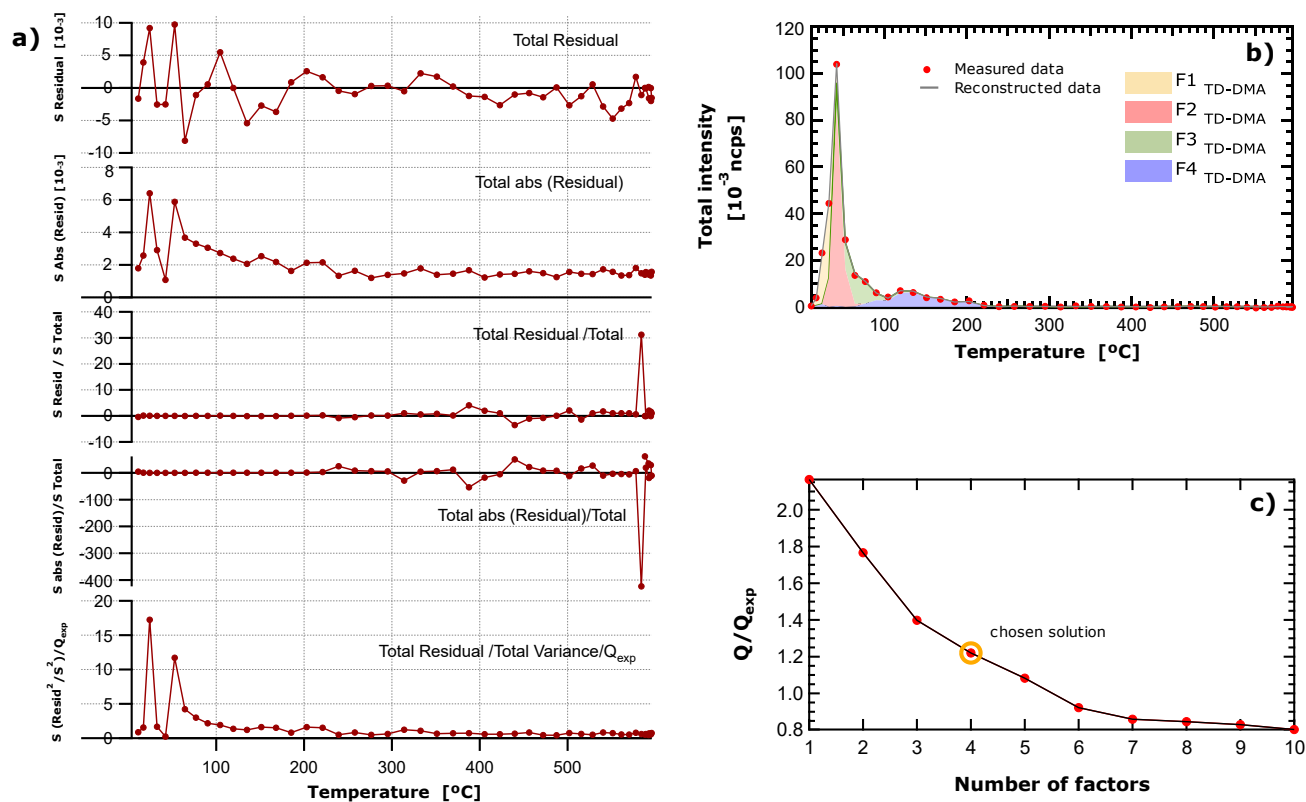

135 **Figure S7. a)** Residuals for TD-DMA 4-Factor solution expressed in terms of total residual, absolute residual, variance and  $Q_{\text{exp}}$   
 (square of the residual scaled with the error summed over all ions and observations) against the temperature. More details about  
 the calculation and interpretation of these quantities can be found in Buchholz et al. (2020); **b)** Measured and reconstructed TD-  
 DMA total intensity against the temperature, the contribution of the factors are shown with different colors, and **c)**  $Q/Q_{\text{exp}}$  vs  
 140 **Number of factors.**  $Q/Q_{\text{exp}}$  is an optimization parameter based on the residuals and described in Buchholz et al. (2020), in the ideal  
 case  $Q/Q_{\text{exp}}$  is equal to 1.

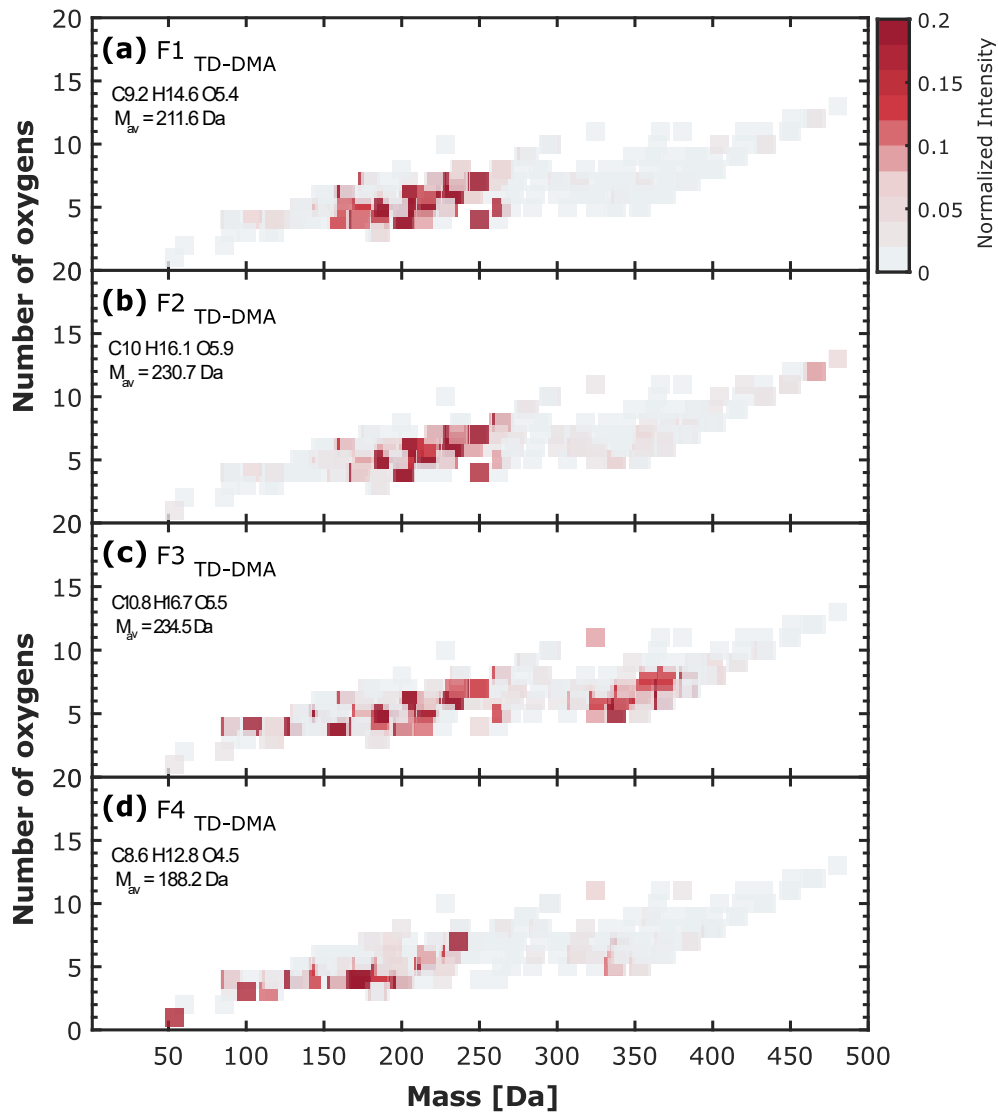

145 **Figure 8. PMF suggested solution on the particle-phase detected by the TD-DMA in  $\alpha$ -pinene ozonolysis experiment at -30 °C and 20 % RH, (a) F1<sub>TD-DMA</sub>, (b) F2<sub>TD-DMA</sub>, (c) F3<sub>TD-DMA</sub> and, (d) F4<sub>TD-DMA</sub> are the factors mass spectra expressed in terms of number of oxygens against the neutral ion mass. The colorscale represents the intensity normalized by the total particle signal. The particle-phase signal has been background corrected.**

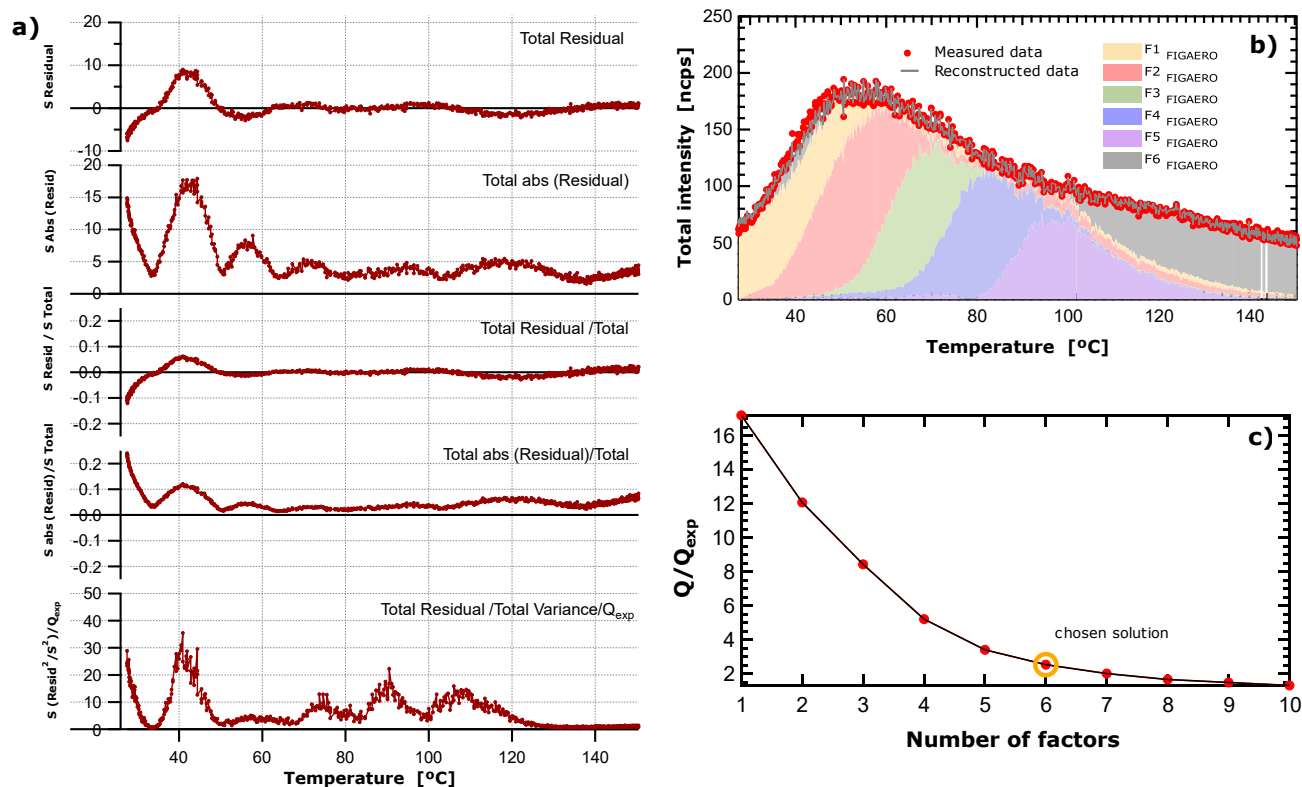

155 **Figure S9. a)** Residuals for FIGAERO 6-Factor solution expressed in terms of total residual, absolute residual, variance and  $Q_{exp}$  (square of the residual scaled with the error summed over all ions and observations) against the temperature. More details about the calculation and interpretation of these quantities can be found in Buchholz et al. (2020); **b)** Measured and reconstructed FIGAERO total intensity against the temperature, the contribution of the factors are shown with different colors, and **c)**  $Q/Q_{exp}$  vs Number of factors.  $Q/Q_{exp}$  is an optimization parameter based on the residuals and described in Buchholz et al. (2020), in the ideal case  $Q/Q_{exp}$  is equal to 1.

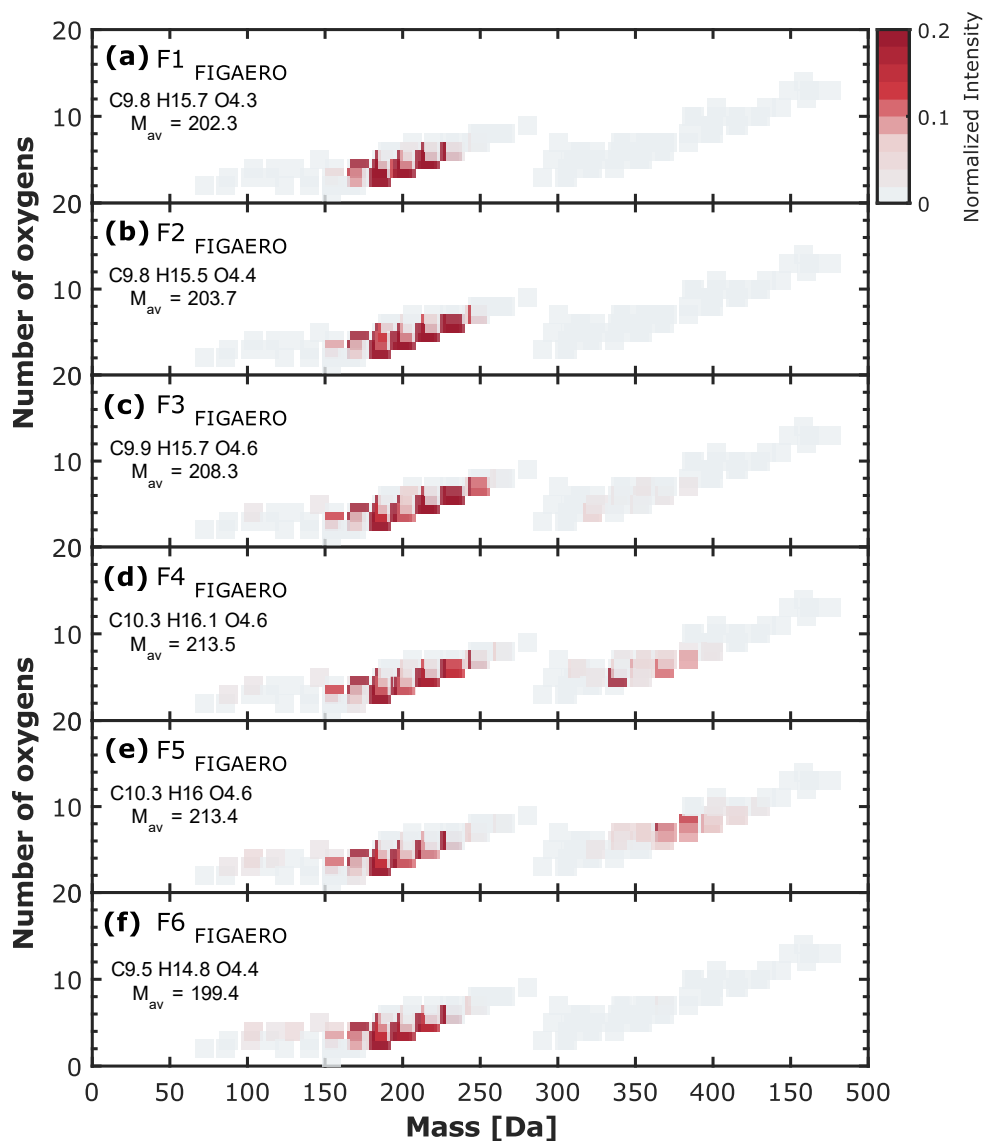

165 **Figure S10.** PMF suggested solution on the particle-phase detected by FIGAERO in  $\alpha$ -pinene ozonolysis experiment at  $-30$  °C and 20 % RH, (a) F1 FIGAERO, (b) F2 FIGAERO, (c) F3 FIGAERO, (d) F4 FIGAERO, (e) F5 FIGAERO and, (f) F6 FIGAERO are the factors mass spectra expressed in terms of number of oxygens against the neutral ion mass. The colorscale represents the intensity normalized by the total particle signal. The particle-phase signal has been background corrected.

170

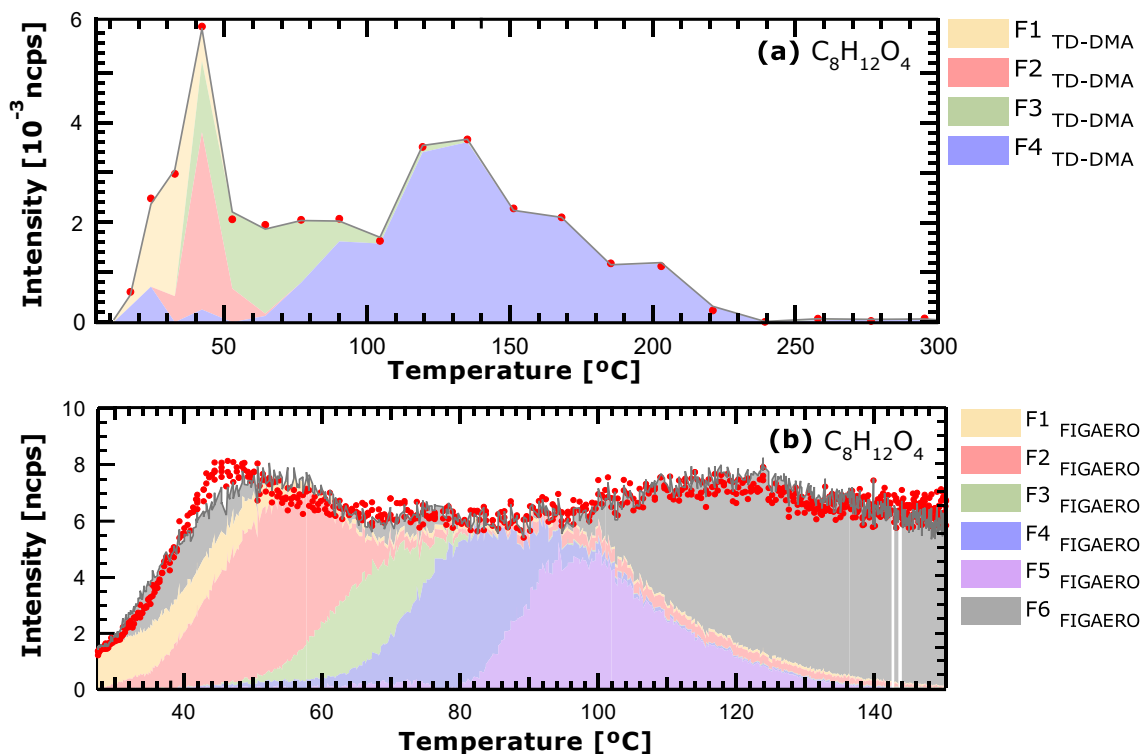

175 Figure S11. Factor thermograms on the PMF suggested solutions for  $C_8H_{12}O_4$  measured by (a) TD-DMA and (b) FIGAERO in the  $\alpha$ -pinene ozonolysis experiment at  $-30^{\circ}C$  and 20 % RH.

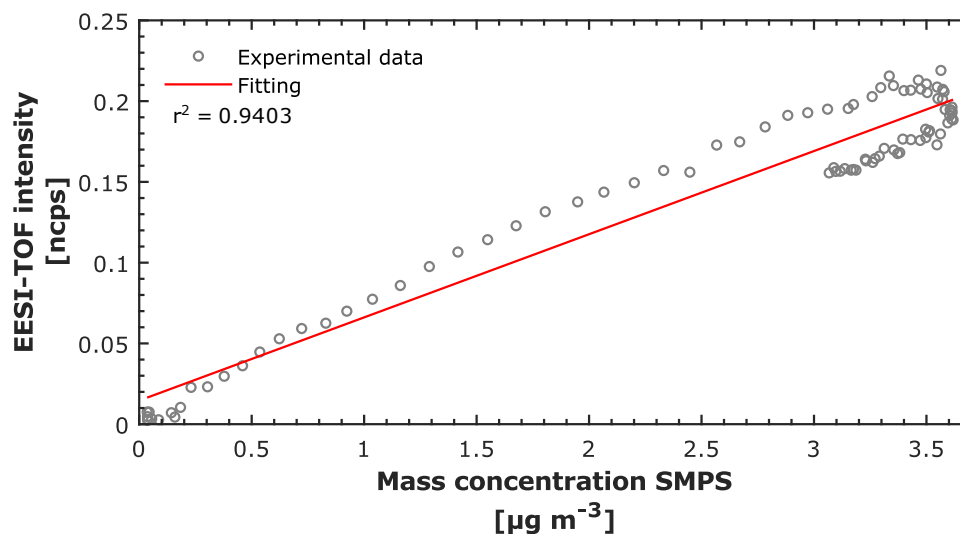

Figure S12. Correlation plot of total EESI intensity in ncps and the mass concentration calculated from the SMPS for the representative experiment shown in Fig. S6. The EESI-TOF particle signal was averaged every 5 minutes for correlation with the SMPS.

180

Buchholz, A., Ylisimiö, A., Huang, W., Mohr, C., Canagaratna, M., Worsnop, D. R., Schobesberger, S., and Virtanen, A.: Deconvolution of FIGAERO–CIMS thermal desorption profiles using positive matrix factorisation to identify chemical and physical processes during particle evaporation, *Atmos. Chem. Phys.*, 20, 7693–7716, 10.5194/acp-20-7693-2020, 2020.

185
